# Supplementary material for: Calculation of the Isobaric Heat Capacities of the Liquid and Solid Phase of Organic Compounds at 298.15K by Means of a Generally Applicable Computer Algorithm Based on the Group-Additivity Method
Source: Preprints.org preprint supplement (doi:10.20944/preprints202002.0076.v1), 2020-02-06
Supplement: Supplementary file 1 [file S03. Experimental vs. calculated Cp(liq,298) Data Table.doc]

| Molecules sorted by calc. Values |  |  |  |  |  |
| --- | --- | --- | --- | --- | --- |
| Molecule name | Cp(liq,298) exp | Cp(liq,298) calc | Cp(liq,298) test | Deviation | Dev. in % |
| Methanethiol | 89.1 | 85.9 | 85.5 | 3.6 | 4.04 |
| Acetonitrile | 91.7 | 85.9 | 85.2 | 6.5 | 7.09 |
| Oxirane | 87 | 88.7 | 88.3 | -1.3 | -1.49 |
| Cyclopropane | 81.2 | 90.4 | 91 | -9.8 | -12.07 |
| Acetaldehyde | 89.05 | 91.9 | 92.7 | -3.65 | -4.1 |
| Chloroethylene | 89.45 | 92 | 92.5 | -3.05 | -3.41 |
| Methanol | 81.92 | 95.6 | 96 | -14.08 | -17.19 |
| Methylamine | 102.1 | 95.8 | 96.2 | 5.9 | 5.78 |
| Propylene | 102 | 95.8 | 95.7 | 6.3 | 6.18 |
| Hydrazine | 92.89 | 97.3 |  | -4.41 | -4.75 |
| Formamide | 107.9 | 100.9 |  | 7 | 6.49 |
| Chloroethane | 107.8 | 100.9 | 100.4 | 7.4 | 6.86 |
| Bromoethane | 105.8 | 101 | 100.4 | 5.4 | 5.1 |
| Nitromethane | 105.98 | 102.2 | 98.4 | 7.58 | 7.15 |
| Dimethylether | 102.5 | 103.2 | 104 | -1.5 | -1.46 |
| 1,1,1-Trifluoroethane | 109.6 | 103.9 | 104.1 | 5.5 | 5.02 |
| Ethyl iodide | 115.1 | 104.8 | 103.8 | 11.3 | 9.82 |
| Formic acid | 99.04 | 107.2 | 108.2 | -9.16 | -9.25 |
| Cyanoethylene | 110.88 | 107.6 | 106.1 | 4.78 | 4.31 |
| Acetylchloride | 117.2 | 107.6 | 106.4 | 10.8 | 9.22 |
| Oxetane | 99.6 | 109.2 | 109.6 | -10 | -10.04 |
| Cyclobutane | 106.3 | 111 | 111 | -4.7 | -4.42 |
| cis-1,2-Dichloroethylene | 113.8 | 112.3 |  | 1.5 | 1.32 |
| trans-1,2-Dichloroethylene | 114.24 | 112.3 |  | 1.94 | 1.7 |
| Vinylidenechloride | 111.29 | 113.1 |  | -1.81 | -1.63 |
| Ethanethiol | 117.9 | 113.4 | 113.3 | 4.6 | 3.9 |
| Methyl formate | 119.1 | 113.5 | 112.9 | 6.2 | 5.21 |
| Dimethyl sulfide | 118.1 | 115.5 | 113.6 | 4.5 | 3.81 |
| Furan | 114.56 | 115.7 | 114 | 0.56 | 0.49 |
| Thietane | 113.39 | 115.7 | 115.4 | -2.01 | -1.77 |
| Trifluoroacetonitrile | 118 | 115.7 | 114.9 | 3.1 | 2.63 |
| Propanenitrile | 119.3 | 115.9 | 115.2 | 4.1 | 3.44 |
| 2,5-Furandione | 120.1 | 116.9 | 117.2 | 2.9 | 2.41 |
| s-trans-1,3-Butadiene | 123.65 | 117.5 | 117 | 6.65 | 5.38 |
| 2-Oxetanone | 122.1 | 119.2 | 119.4 | 2.7 | 2.21 |
| Methyloxiran | 120.4 | 119.3 | 118.9 | 1.5 | 1.25 |
| trans-2-Butene | 124.3 | 119.8 | 119.7 | 4.6 | 3.7 |
| cis-2-Butene | 127 | 119.8 | 119.1 | 7.9 | 6.22 |
| 1,3-Dioxolane | 122.16 | 121 | 120.7 | 1.46 | 1.2 |
| 1,2-Butadiene | 123 | 121.3 | 120.6 | 2.4 | 1.95 |
| Cyclopentadiene | 115.3 | 121.4 | 121.9 | -6.6 | -5.72 |
| 2-Butyne | 124.3 | 122 | 120.3 | 4 | 3.22 |
| Propanal | 134.7 | 122 | 122.2 | 12.5 | 9.28 |
| Allyl chloride | 125.1 | 122.6 | 122.4 | 2.7 | 2.16 |
| 1-Chloro-1,1-difluoroethane | 130.5 | 122.7 | 121.5 | 9 | 6.9 |
| Pyrrole | 127.74 | 122.7 | 118.5 | 9.24 | 7.23 |
| Ethylamine | 130 | 123.2 | 124.3 | 5.7 | 4.38 |
| 1,1-Dichloroethane | 126.27 | 123.5 | 123 | 3.27 | 2.59 |
| Propanone | 124.7 | 124.3 | 124.1 | 0.6 | 0.48 |
| Ethanol | 115.9 | 125.2 | 125.2 | -9.3 | -8.02 |
| 1-Butene | 128.96 | 125.8 | 124.9 | 4.06 | 3.15 |
| Isobutylene | 121.3 | 126 | 125.7 | -4.4 | -3.63 |
| Ethylenedichloride | 128.81 | 127.6 | 125.7 | 3.11 | 2.41 |
| 1-Bromo-2-chloroethane | 130.1 | 127.8 | 128 | 2.1 | 1.61 |
| 1,2-Dibromoethane | 134.72 | 127.9 | 125.3 | 9.42 | 6.99 |
| Cyclopentene | 122.38 | 128 | 128.1 | -5.72 | -4.67 |
| N-Methylformamide | 123.9 | 128.2 |  | -4.3 | -3.47 |
| Spiro[2.2]pentane | 134.52 | 128.5 | 128.7 | 5.82 | 4.33 |
| Acetic acid | 123.1 | 128.7 | 129 | -5.9 | -4.79 |
| Tetrahydrofuran | 123.9 | 128.9 | 129 | -5.1 | -4.12 |
| Dimethylamine | 136.8 | 128.9 | 130.6 | 6.2 | 4.53 |
| Cyclopropanecarbonitrile | 115.5 | 130.3 | 131 | -15.5 | -13.42 |
| 1-Butyne | 132.6 | 130.5 | 129 | 3.6 | 2.71 |
| Cyclopentane | 128.8 | 130.6 | 130.2 | -1.4 | -1.09 |
| 1-Chloropropane | 131.3 | 130.9 | 130.8 | 0.5 | 0.38 |
| 2-Bromopropane | 135.6 | 130.9 | 129.6 | 6 | 4.42 |
| 1-Bromopropane | 133.46 | 131 | 130.4 | 3.06 | 2.29 |
| Benzene | 136.8 | 132 | 131.8 | 5 | 3.65 |
| 1,3-Dioxolan-2-one | 133.9 | 132.8 | 133 | 0.9 | 0.67 |
| Methylhydrazine | 134.93 | 132.9 |  | 2.03 | 1.5 |
| Trichloroethylene | 128.9 | 133.4 |  | -4.5 | -3.49 |
| Perfluoroethane | 131.4 | 133.6 | 134.4 | -3 | -2.28 |
| Pyridine | 133 | 133.9 | 132.7 | 0.3 | 0.23 |
| Nitroethane | 134.22 | 134.2 | 133.8 | 0.42 | 0.31 |
| Butane | 140.9 | 134.2 | 133.9 | 7 | 4.97 |
| 1-Iodopropane | 136.2 | 134.8 | 134.6 | 1.6 | 1.17 |
| Methyl acetate | 140.56 | 135 | 135.6 | 4.96 | 3.53 |
| 2,3-Dihydrofuran | 122.1 | 135 | 135.8 | -13.7 | -11.22 |
| Thiolane | 140.16 | 137 | 136.4 | 3.76 | 2.68 |
| Propanoyl chloride | 147.3 | 137.6 | 140.2 | 7.1 | 4.82 |
| Crotonaldehyde | 148.6 | 137.6 | 136.5 | 12.1 | 8.14 |
| Cyclopropylamine | 147.11 | 137.8 | 135.2 | 11.91 | 8.1 |
| 2-Methylacrylonitrile | 126.3 | 137.8 | 138.7 | -12.4 | -9.82 |
| gamma-Butyrolactone | 141.4 | 138.9 | 139 | 2.4 | 1.7 |
| 1,1,1-Trichloroethane | 143.93 | 139.6 | 138.9 | 5.03 | 3.49 |
| Trimethylamine | 132.6 | 139.9 | 141.4 | -8.8 | -6.64 |
| Methylenecyclobutane | 133.6 | 140.7 | 142.5 | -8.9 | -6.66 |
| cis-1,3-Pentadiene | 146.57 | 141.5 | 141.1 | 5.47 | 3.73 |
| trans-1,3-Pentadiene | 149.33 | 141.5 | 141.1 | 8.23 | 5.51 |
| 1-Cyanobicyclobutane | 131.8 | 142.3 | 143.5 | -11.7 | -8.88 |
| 2-Propanethiol | 145.35 | 142.6 | 142.2 | 3.15 | 2.17 |
| Methylnitrate | 156.9 | 142.8 |  | 14.1 | 8.99 |
| Ethyl methyl sulfide | 144.6 | 143 | 142.1 | 2.5 | 1.73 |
| Ethyl formate | 144.3 | 143.1 | 143.3 | 1 | 0.69 |
| 1-Propanethiol | 144.56 | 143.5 | 144 | 0.56 | 0.39 |
| Isobutyronitrile | 156.1 | 144.1 | 143.5 | 12.6 | 8.07 |
| 2,3-Pentadiene | 152.34 | 145.3 | 143.2 | 9.14 | 6 |
| Butyronitrile | 134.2 | 146 | 146.9 | -12.7 | -9.46 |
| 2-Methylfuran | 143.72 | 146.1 | 145.7 | -1.98 | -1.38 |
| Epichlorohydrin | 131.6 | 146.1 | 147.1 | -15.5 | -11.78 |
| Allyl alcohol | 146.3 | 146.9 | 147.7 | -1.4 | -0.96 |
| Fluorobenzene | 146.29 | 147.1 | 147.1 | -0.81 | -0.55 |
| Dimethyl disulfide | 146.11 | 147.1 | 147.5 | -1.39 | -0.95 |
| 1,3-Dioxane | 143.9 | 147.1 | 147.7 | -3.8 | -2.64 |
| 1,4-Pentadiene | 146.82 | 147.5 | 149.1 | -2.28 | -1.55 |
| 1,3-Cyclohexadiene | 141.3 | 147.6 | 149.6 | -8.3 | -5.87 |
| Isoprene | 151.08 | 147.7 | 147.3 | 3.78 | 2.5 |
| Quadricyclane | 157.6 | 148.2 | 145.2 | 12.4 | 7.87 |
| Ethan-1,2-diol | 149.8 | 148.6 | 150.2 | -0.4 | -0.27 |
| Ethylepoxide | 147 | 149.4 | 150.1 | -3.1 | -2.11 |
| cis-2-Pentene | 151.8 | 149.8 | 149.9 | 1.9 | 1.25 |
| trans-2-Pentene | 157 | 149.8 | 150.7 | 6.3 | 4.01 |
| Trimethylethylene | 152.8 | 150 | 150.5 | 2.3 | 1.51 |
| Pyrrolidine | 156.57 | 150.1 | 149.3 | 7.27 | 4.64 |
| 1,1,2-Trichloroethane | 150.9 | 150.3 | 148.7 | 2.2 | 1.46 |
| Acrylic acid | 144.2 | 150.4 | 150.3 | -6.1 | -4.23 |
| Cyclobutanecarbonitrile | 146 | 150.9 | 151.8 | -5.8 | -3.97 |
| N,N-Dimethylformamide | 148.36 | 151 |  | -2.64 | -1.78 |
| Chlorobenzene | 153.78 | 151.3 | 151.2 | 2.58 | 1.68 |
| 1,2-Pentadiene | 150.83 | 151.4 | 151.4 | -0.57 | -0.38 |
| 3-Methyl-1,2-butadiene | 152.42 | 151.5 | 151 | 1.42 | 0.93 |
| 1,4-Cyclohexadiene | 142.2 | 151.5 | 151.3 | -9.1 | -6.4 |
| Isopropylamine | 164 | 151.5 | 150.1 | 13.9 | 8.48 |
| Butanal | 163.7 | 152 | 151.1 | 12.6 | 7.7 |
| 1-Methylpyrrole | 150.06 | 152.6 | 168.1 | -18.04 | -12.02 |
| 1-Propylamine | 161.9 | 153.2 | 153 | 8.9 | 5.5 |
| 1,4-Dioxane | 150.65 | 153.3 | 153.5 | -2.85 | -1.89 |
| 1-Methylimidazole | 147.2 | 153.3 |  | -6.1 | -4.14 |
| 2-Pyrrolidone | 169.5 | 153.5 | 152.6 | 16.9 | 9.97 |
| 1,1-Dichloropropane | 152.82 | 153.6 | 154.4 | -1.58 | -1.03 |
| 3-Methyl-1-butene | 156.1 | 153.9 | 153.6 | 2.5 | 1.6 |
| Cyclohexene | 152.9 | 154.1 | 153.8 | -0.9 | -0.59 |
| 2-Butanone | 158.4 | 154.4 | 153.8 | 4.6 | 2.9 |
| 2-Methylthiophene | 149.83 | 154.5 |  | -4.67 | -3.12 |
| Tetrachloroethylene | 157.7 | 154.5 | 147.1 | 10.6 | 6.72 |
| Tetrahydropyran | 149.6 | 155 | 155.5 | -5.9 | -3.94 |
| 1-Propanol | 146.88 | 155.3 | 155.3 | -8.42 | -5.73 |
| Dimethoxymethane | 163.6 | 155.4 | 152.3 | 11.3 | 6.91 |
| Chloroacetic acid | 179.9 | 155.5 | 155 | 24.9 | 13.84 |
| 1-Pentene | 155.3 | 155.9 | 154.9 | 0.4 | 0.26 |
| 2,2-Dimethylpropane | 153.1 | 155.9 | 156.2 | -3.1 | -2.02 |
| Isopentene | 157.3 | 156 | 155.7 | 1.6 | 1.02 |
| 3-Methylcyclopentene | 152.3 | 156.1 | 156.3 | -4 | -2.63 |
| Methyl acrylate | 158.8 | 156.7 | 156.6 | 2.2 | 1.39 |
| Cyclohexane | 158.1 | 156.8 | 157.4 | 0.7 | 0.44 |
| Chlorocyclopentane | 152.4 | 157.1 | 156.1 | -3.7 | -2.43 |
| 1,2-Dichloropropane | 156.81 | 157.3 | 157.2 | -0.39 | -0.25 |
| Chloral | 151.5 | 157.4 | 158.4 | -6.9 | -4.55 |
| 2,5-Norbornadiene | 161.2 | 157.5 | 155.4 | 5.8 | 3.6 |
| 1,3-Dichloropropane | 157 | 157.7 | 157.9 | -0.9 | -0.57 |
| Methyltrichlorosilane | 163.1 | 157.8 |  | 5.3 | 3.25 |
| Succinonitrile | 145.6 | 157.8 | 159.6 | -14 | -9.62 |
| 1,2-Dibromopropane | 172.8 | 157.8 | 152.6 | 20.2 | 11.69 |
| Iodobenzene | 158.4 | 157.9 |  | 0.5 | 0.32 |
| 1,3-Dibromopropane | 163.7 | 157.9 | 155.4 | 8.3 | 5.07 |
| 1-Methylcyclopentene | 153.1 | 158.2 | 158.2 | -5.1 | -3.33 |
| Methylbenzene | 158.7 | 158.6 | 158.4 | 0.3 | 0.19 |
| Cyclopentanone | 154.5 | 158.7 | 158.6 | -4.1 | -2.65 |
| Methylcyclopentane | 158.7 | 158.8 | 158.9 | -0.2 | -0.13 |
| Propanoic acid | 158.6 | 158.8 | 159.2 | -0.6 | -0.38 |
| Isobutyl chloride | 158.6 | 159 | 159.2 | -0.6 | -0.38 |
| Isobutyl bromide | 163.7 | 159.1 | 158.1 | 5.6 | 3.42 |
| 2-Picoline | 158.41 | 159.2 | 159.5 | -1.09 | -0.69 |
| Dimethyl carbonate | 157.9 | 159.5 | 159.5 | -1.6 | -1.01 |
| 2-Methyltetrahydrofuran | 156.89 | 159.6 | 158.7 | -1.81 | -1.15 |
| 4-Methylpyridine | 158.99 | 160.5 | 161 | -2.01 | -1.26 |
| 3-Methylpyridine | 158.69 | 160.5 | 161.2 | -2.51 | -1.58 |
| 2-Chlorobutane | 160.9 | 160.6 | 160.6 | 0.3 | 0.19 |
| 3-Chloro-1,1,1-trifluoropropane | 171.08 | 160.7 | 159.7 | 11.38 | 6.65 |
| 1-Chlorobutane | 159.64 | 161 | 160.9 | -1.26 | -0.79 |
| 1-Bromobutane | 162.2 | 161.1 | 161.2 | 1 | 0.62 |
| N-Methylpyrrolidine | 167.75 | 161.1 | 159.4 | 8.35 | 4.98 |
| 2-Cyanopropionaldehyde | 169.5 | 161.9 | 160.5 | 9 | 5.31 |
| Bromobenzene | 155.23 | 162 | 162.5 | -7.27 | -4.68 |
| 1,3-Difluorobenzene | 159.11 | 162.1 | 161.9 | -2.79 | -1.75 |
| 1,4-Difluorobenzene | 159.1 | 162.1 | 162.4 | -3.3 | -2.07 |
| 1,2-Difluorobenzene | 159.03 | 162.1 | 162.5 | -3.47 | -2.18 |
| Isopentane | 164.85 | 162.3 | 162.6 | 2.25 | 1.36 |
| Ethyl ether | 172.5 | 162.5 | 162.4 | 10.1 | 5.86 |
| Isobutyl iodide | 165.5 | 162.9 | 164.5 | 1 | 0.6 |
| Methylpropylether | 165.4 | 162.9 | 163.2 | 2.2 | 1.33 |
| 1-Cyanobicyclo[2.1.0]pentane | 164 | 162.9 | 161.3 | 2.7 | 1.65 |
| Thiane | 163.3 | 163.1 | 163.3 | 0 | 0 |
| Isopropyl methyl ether | 161.9 | 163.5 | 164.8 | -2.9 | -1.79 |
| Propylenecarbonate | 167.4 | 163.5 | 163.1 | 4.3 | 2.57 |
| 2-Methoxy-1-propene | 162.3 | 163.6 | 165.9 | -3.6 | -2.22 |
| Furfural | 162.8 | 163.9 | 164.5 | -1.7 | -1.04 |
| Pentane | 167.19 | 164.2 | 164.3 | 2.89 | 1.73 |
| 1-Nitropropane | 160.4 | 164.2 | 166.5 | -6.1 | -3.8 |
| Ethyl acetate | 169.06 | 164.6 | 164.5 | 4.56 | 2.7 |
| 1-Iodobutane | 164.5 | 164.9 | 163.8 | 0.7 | 0.43 |
| Tetrahydro-2H-pyran-2-one | 170.7 | 165 | 164.5 | 6.2 | 3.63 |
| Methyl propanoate | 172.74 | 165.1 | 165.3 | 7.44 | 4.31 |
| 3-Methylthiolane | 172.85 | 165.1 | 164.3 | 8.55 | 4.95 |
| 1,3-Diiodopropane | 169.2 | 165.5 | 163.7 | 5.5 | 3.25 |
| 2-Methylthiolane | 172 | 166.1 | 165 | 7 | 4.07 |
| 1,3,5-Cycloheptatriene | 162.76 | 167.1 | 168.1 | -5.34 | -3.28 |
| Dichlorodimethylsilane | 171.5 | 167.4 |  | 4.1 | 2.39 |
| Butanoyl chloride | 170.7 | 167.7 | 167.5 | 3.2 | 1.87 |
| Pivalonitrile | 179.37 | 167.7 | 168.3 | 11.07 | 6.17 |
| 1,2-Dimethylhydrazine | 171.04 | 168.6 |  | 2.44 | 1.43 |
| Cyclopentanethiol | 165.2 | 169.1 | 169.6 | -4.4 | -2.66 |
| 1,1,1-Trichlorotrifluoroethane | 168.6 | 169.4 | 169.4 | -0.8 | -0.47 |
| t-Butylmercaptan | 174.9 | 169.6 | 168.9 | 6 | 3.43 |
| Benzonitrile | 165.2 | 170.4 | 171 | -5.8 | -3.51 |
| Diethyl sulphide | 171.42 | 170.5 | 171 | 0.42 | 0.25 |
| 1,2-Dichlorobenzene | 170.9 | 170.6 | 170.5 | 0.4 | 0.23 |
| 1,3-Dichlorobenzene | 170.18 | 170.6 | 170.7 | -0.52 | -0.31 |
| Cyclopentanecarbonitrile | 167.4 | 170.6 | 170.9 | -3.5 | -2.09 |
| Cryofluorane | 164 | 171.4 | 179.4 | -15.4 | -9.39 |
| 2-Methyl-1-propanethiol | 171.88 | 171.6 | 172.4 | -0.52 | -0.3 |
| Isopropyl methyl sulfide | 172.38 | 172.1 | 171.1 | 1.28 | 0.74 |
| 1,1-Difluoro-1,2,2-trichloroethane | 167.04 | 172.2 | 174.1 | -7.06 | -4.23 |
| 1,2-Diaminoethane | 170 | 172.3 | 173 | -3 | -1.76 |
| Ethylnitrate | 170.3 | 172.4 |  | -2.1 | -1.23 |
| 2-Butanethiol | 171.2 | 172.6 | 172.5 | -1.3 | -0.76 |
| 1,2-Dibromotetrafluoroethane | 173.8 | 172.8 |  | 1 | 0.58 |
| 1,1,2,2-Tetrachloroethane | 168 | 173 | 176 | -8 | -4.76 |
| Methyl propyl sulfide | 171.63 | 173.1 | 173.4 | -1.77 | -1.03 |
| n-Propylformate | 171.5 | 173.2 | 175 | -3.5 | -2.04 |
| 1,3-Dioxepane | 167 | 173.2 | 175 | -8 | -4.79 |
| Norcarane | 187.9 | 173.2 | 172.4 | 15.5 | 8.25 |
| 1-Butanethiol | 172.3 | 173.5 | 174.1 | -1.8 | -1.04 |
| 4-Fluorotoluene | 173.7 | 173.7 | 173.5 | 0.2 | 0.12 |
| 2-Fluorotoluene | 171.2 | 173.7 | 173.7 | -2.5 | -1.46 |
| Pivalaldehyde | 185.58 | 173.8 | 172.6 | 12.98 | 6.99 |
| Colamine | 166.14 | 174.3 | 174.5 | -8.36 | -5.03 |
| Morpholine | 164.8 | 174.5 | 175.5 | -10.7 | -6.49 |
| Dimethylacetamide | 175.6 | 174.6 | 174.5 | 1.1 | 0.63 |
| Methylvinyldichlorosilane | 177.9 | 175.7 |  | 2.2 | 1.24 |
| N-Methyl-2-pyrrolidone | 166.26 | 176.2 | 176.5 | -10.24 | -6.16 |
| Piperidine | 179.86 | 176.3 | 176.6 | 3.26 | 1.81 |
| Phenylisocyanate | 186.2 | 176.3 | 165.5 | 20.7 | 11.12 |
| Benzaldehyde | 177.9 | 176.4 | 176.3 | 1.6 | 0.9 |
| 7-Oxabicyclo[4.1.0]heptane | 166.1 | 176.5 | 177.3 | -11.2 | -6.74 |
| 3,3-Dimethyl-1-butene | 188.3 | 177.6 | 177.3 | 11 | 5.84 |
| 2-Propanol | 154.43 | 177.7 | 178.7 | -24.27 | -15.72 |
| 2-Chlorotoluene | 166.8 | 177.9 | 178.9 | -12.1 | -7.25 |
| Cyclopentylamine | 181.21 | 178.1 | 180.1 | 1.11 | 0.61 |
| Dichloroacetic acid | 188 | 178.2 | 177.7 | 10.3 | 5.48 |
| 3-Methylpyrrolidine | 188.28 | 178.3 | 177.5 | 10.78 | 5.73 |
| 2,5-Dimethylthiophene | 178.32 | 178.4 |  | -0.08 | -0.04 |
| Propan-1,3-diol | 175.78 | 178.7 | 178.2 | -2.42 | -1.38 |
| Ethylacetamide | 179.9 | 179.2 | 178.9 | 1 | 0.56 |
| Dimethylmalononitrile | 179.5 | 179.6 | 179.7 | -0.2 | -0.11 |
| cis-2-Hexene | 178.36 | 179.9 | 179.9 | -1.54 | -0.86 |
| Tetramethylethene | 174.68 | 180.2 | 182.1 | -7.42 | -4.25 |
| Cycloheptene | 171.7 | 180.3 | 180.6 | -8.9 | -5.18 |
| Styrene | 201.9 | 180.3 | 179.3 | 22.6 | 11.19 |
| 3-Methylenecyclobutanenitrile | 190.8 | 180.6 | 179.1 | 11.7 | 6.13 |
| Methacrylic acid | 161.1 | 180.6 | 180.6 | -19.5 | -12.1 |
| 1-Ethylimidazole | 186.82 | 180.7 |  | 6.12 | 3.28 |
| 3-Bromochlorobenzene | 181.9 | 181.3 | 181.8 | 0.1 | 0.05 |
| Bromo-2-chlorobenzene | 176.9 | 181.3 | 180.6 | -3.7 | -2.09 |
| 2-Methylpropylamine | 183.2 | 181.4 | 181.6 | 1.6 | 0.87 |
| Aniline | 178.7 | 181.6 | 184.1 | -5.4 | -3.02 |
| N-Methylpropionamide | 179 | 181.8 | 182.7 | -3.7 | -2.07 |
| n-Valeraldehyde | 174.39 | 182.1 | 183 | -8.61 | -4.94 |
| 4-Methylcyclohexene | 180.42 | 182.3 | 183.1 | -2.68 | -1.49 |
| Nitrobenzene | 186.6 | 182.3 | 183.2 | 3.4 | 1.82 |
| 1,1-Dimethylcyclopentane | 186.61 | 182.4 | 181.9 | 4.71 | 2.52 |
| 3-Methyl-2-butanone | 180 | 182.5 | 182.8 | -2.8 | -1.56 |
| 1-Cyanobicyclo[3.1.0]hexane | 170.3 | 182.5 | 183 | -12.7 | -7.46 |
| 3-Chloro-1,1,1,3,3-pentafluoropropane | 196.6 | 182.6 | 179.7 | 16.9 | 8.6 |
| Cyclooctatetraene | 185.18 | 182.8 | 181.8 | 3.38 | 1.83 |
| Cycloheptane | 180.61 | 182.9 | 182.5 | -1.89 | -1.05 |
| 1-Butylamine | 179.2 | 183.3 | 184 | -4.8 | -2.68 |
| 2-Methyl-1-propanol | 181.05 | 183.4 | 182.9 | -1.85 | -1.02 |
| Benzo[b]furan | 178.7 | 183.5 | 183.7 | -5 | -2.8 |
| Bromocyclohexane | 182.1 | 183.6 | 184.3 | -2.2 | -1.21 |
| Diethylamine | 169.2 | 183.7 | 184 | -14.8 | -8.75 |
| 1,2-Diiodobenzene | 190 | 183.8 |  | 6.2 | 3.26 |
| Perfluoroacetone | 181.2 | 183.9 | 184.6 | -3.4 | -1.88 |
| Methyl cellosolve | 176.4 | 184 | 185.1 | -8.7 | -4.93 |
| 1,2,3-Trichloropropane | 183.6 | 184.1 | 184.5 | -0.9 | -0.49 |
| Ethylidenecyclopentane | 181.2 | 184.3 | 185.2 | -4 | -2.21 |
| Methyl-n-propylketone | 184.1 | 184.4 | 184.4 | -0.3 | -0.16 |
| Diethylketone | 190.9 | 184.4 | 184.3 | 6.6 | 3.46 |
| 2,6-Lutidine | 185.17 | 184.5 | 184.4 | 0.77 | 0.42 |
| Perfluoropropane | 181.6 | 184.5 | 185.1 | -3.5 | -1.93 |
| Ethyltrichlorosilane | 192.6 | 184.6 |  | 8 | 4.15 |
| 1,2,3-Tribromopropane | 166.5 | 184.7 | 191.8 | -25.3 | -15.2 |
| Cyclohexanone | 182.2 | 184.8 | 183.8 | -1.6 | -0.88 |
| Methylcyclohexane | 184.96 | 184.9 | 184.5 | 0.46 | 0.25 |
| Ethynylbenzene | 180.1 | 184.9 | 185.7 | -5.6 | -3.11 |
| 1,3-Dimethylbenzene | 183.18 | 185.2 | 185 | -1.82 | -0.99 |
| 1,4-Dimethylbenzene | 183.65 | 185.2 | 185.5 | -1.85 | -1.01 |
| 1,2-Dimethylbenzene | 187.65 | 185.2 | 184.4 | 3.25 | 1.73 |
| 1-Butanol | 177.16 | 185.3 | 186.2 | -9.04 | -5.1 |
| Indole | 192 | 185.3 | 180.8 | 11.2 | 5.83 |
| (Chloromethyl)benzene | 182.4 | 185.4 | 185.2 | -2.8 | -1.54 |
| N-Methylmorpholine | 199.26 | 185.5 | 184.2 | 15.06 | 7.56 |
| 2,4-Lutidine | 184.76 | 185.8 | 186.1 | -1.34 | -0.73 |
| 2,5-Lutidine | 184.7 | 185.8 | 186.2 | -1.5 | -0.81 |
| 2,3-Lutidine | 189.55 | 185.8 | 185.3 | 4.25 | 2.24 |
| 1-Hexene | 183.3 | 185.9 | 186.4 | -3.1 | -1.69 |
| Neohexane | 189.67 | 186 | 185.5 | 4.17 | 2.2 |
| Allyl acetate | 184.1 | 186.3 | 187 | -2.9 | -1.58 |
| Methylenecyclohexane | 177.4 | 186.5 | 186.1 | -8.7 | -4.9 |
| Indene | 186.94 | 186.9 | 188 | -1.06 | -0.57 |
| trans-1,2-Dimethylcyclopentane | 188.7 | 186.9 | 187 | 1.7 | 0.9 |
| trans-1,3-Dimethylcyclopentane | 188.7 | 186.9 | 187 | 1.7 | 0.9 |
| Methyl methacrylate | 188.7 | 186.9 | 186.5 | 2.2 | 1.17 |
| cis-1,2-Dimethylcyclopentane | 190.8 | 186.9 | 187 | 3.8 | 1.99 |
| 2-Methylpropanoic acid | 181.7 | 186.9 | 187.1 | -5.4 | -2.97 |
| 3,5-Lutidine | 184.55 | 187.1 | 187.6 | -3.05 | -1.65 |
| 3,4-Lutidine | 196 | 187.1 | 185 | 11 | 5.61 |
| N-Methylpiperidine | 184.9 | 187.2 | 186.6 | -1.7 | -0.92 |
| trans-Bicyclo[3.3.0]octane | 180.3 | 187.3 | 186.9 | -6.6 | -3.66 |
| cis-Bicyclo[3.3.0]octane | 213.4 | 187.3 | 186.5 | 26.9 | 12.61 |
| 1,2-Dichlorobutane | 195.6 | 187.4 | 187.1 | 8.5 | 4.35 |
| t-Butylamine | 191.71 | 187.6 | 189 | 2.71 | 1.41 |
| 1,4-Dichlorobutane | 184 | 187.7 | 188.1 | -4.1 | -2.23 |
| Pentanedinitrile | 183.3 | 187.8 | 188.2 | -4.9 | -2.67 |
| 3-Bromoiodobenzene | 183.1 | 187.9 |  | -4.8 | -2.62 |
| 2-Bromoiodobenzene | 179.9 | 187.9 |  | -8 | -4.45 |
| 1,4-Dibromobutane | 191.2 | 188 | 189.6 | 1.6 | 0.84 |
| 2-Nitropropane | 170.3 | 188 |  | -17.7 | -10.39 |
| 1-Ethylcyclopentene | 188.3 | 188.3 | 189.2 | -0.9 | -0.48 |
| Benzotrifluoride | 188.45 | 188.4 | 189.5 | -1.05 | -0.56 |
| Ethylbenzene | 185.78 | 188.6 | 188.2 | -2.42 | -1.3 |
| Ethylcyclopentane | 187.4 | 188.8 | 188.1 | -0.7 | -0.37 |
| Butanoic acid | 177.7 | 188.8 | 189 | -11.3 | -6.36 |
| Pentachloroethane | 196.2 | 189 | 187.5 | 8.7 | 4.43 |
| Isopentyl chloride | 179.5 | 189.1 | 189.3 | -9.8 | -5.46 |
| Isopentyl bromide | 187 | 189.2 | 189.9 | -2.9 | -1.55 |
| exo-2-Methylnorbornane | 185.8 | 189.3 | 188.5 | -2.7 | -1.45 |
| endo-2-Methylnorbornane | 184.3 | 189.3 | 188.7 | -4.4 | -2.39 |
| 1,2,4-Trichlorobenzene | 194.9 | 189.9 | 188.1 | 6.8 | 3.49 |
| 2,5-Dimethyltetrahydrofuran | 188.13 | 190.2 | 190.8 | -2.67 | -1.42 |
| 2,3-Dimethylbutane | 188.8 | 190.4 | 190.6 | -1.8 | -0.95 |
| MTBE | 187.5 | 190.5 | 191.1 | -3.6 | -1.92 |
| 1-Chloropentane | 188.12 | 191 | 191.4 | -3.28 | -1.74 |
| 1-Bromopentane | 191.33 | 191.1 | 189.9 | 1.43 | 0.75 |
| Caprolactone | 196.8 | 191.1 | 191.2 | 5.6 | 2.85 |
| Methyl bicyclobutane-1-carboxylate | 192.9 | 191.4 | 190.6 | 2.3 | 1.19 |
| Glyme | 191.14 | 191.6 | 192.2 | -1.06 | -0.55 |
| 1,3-Dihydroisobenzofuran | 188.7 | 191.7 | 191.6 | -2.9 | -1.54 |
| 1,3-Dibromobenzene | 192 | 192.1 | 191.4 | 0.6 | 0.31 |
| 1,2-Dibromobenzene | 196.8 | 192.1 | 191.4 | 5.4 | 2.74 |
| Benzoyl chloride | 187 | 192.1 | 192.8 | -5.8 | -3.1 |
| Phenol | 200 | 192.1 | 191.9 | 8.1 | 4.05 |
| 1,2,4,5-Tetrafluorobenzene | 192.2 | 192.2 | 192.3 | -0.1 | -0.05 |
| 1,2,3,5-Tetrafluorobenzene | 190.3 | 192.2 | 190.9 | -0.6 | -0.32 |
| 1,2,3,4-Tetrafluorobenzene | 189.9 | 192.2 | 192.3 | -2.4 | -1.26 |
| 3-Methylpentane | 190.83 | 192.3 | 192.2 | -1.37 | -0.72 |
| 2-Methylpentane | 193.96 | 192.3 | 192.4 | 1.56 | 0.8 |
| Ethyl-n-propylether | 197.2 | 192.5 | 192.5 | 4.7 | 2.38 |
| n-Butyl methyl ether | 192.48 | 193 | 193.3 | -0.82 | -0.43 |
| Isopentyliodide | 178.7 | 193 | 194.5 | -15.8 | -8.84 |
| Indane | 190.25 | 193.4 | 192.8 | -2.55 | -1.34 |
| 1,1-Dimethylsilacyclobutane | 197.53 | 193.6 | 191.9 | 5.63 | 2.85 |
| Hexane | 197.66 | 194.3 | 194.4 | 3.26 | 1.65 |
| Perfluorocyclobutane | 209.6 | 194.4 | 189.6 | 20 | 9.54 |
| n-Propyl acetate | 194.1 | 194.7 | 195.4 | -1.3 | -0.67 |
| Diethylmethylamine | 200 | 194.7 | 194.4 | 5.6 | 2.8 |
| Ethyl propanoate | 204.06 | 194.7 | 194.4 | 9.66 | 4.73 |
| 1-Iodopentane | 193.6 | 194.9 | 195.1 | -1.5 | -0.77 |
| Tetramethylsilane | 204.1 | 195 | 195.3 | 8.8 | 4.31 |
| Naphthalene | 196.06 | 195.1 | 195.8 | 0.26 | 0.13 |
| Butyric acid methylester | 198.16 | 195.1 | 195.2 | 2.96 | 1.49 |
| Cyclohexanethiol | 192.63 | 195.2 | 195 | -2.37 | -1.23 |
| Isopropylacetate | 196.6 | 195.3 | 194.1 | 2.5 | 1.27 |
| 1-Chloro-3-isocyanatobenzene | 187 | 195.6 | 204.3 | -17.3 | -9.25 |
| 1,1,1,3-Tetrachloropropane | 196.4 | 196.4 | 197.2 | -0.8 | -0.41 |
| 4-Fluoroaniline | 195.2 | 196.7 | 197.1 | -1.9 | -0.97 |
| Cyclohexanecarbonitrile | 177.8 | 196.7 | 196.9 | -19.1 | -10.74 |
| Isoquinoline | 196.16 | 197 | 197.7 | -1.54 | -0.79 |
| Furfuranol | 204.01 | 197.3 | 196.1 | 7.91 | 3.88 |
| Valeryl chloride | 187.9 | 197.7 | 200.2 | -12.3 | -6.55 |
| Benzyl mercaptan | 202.81 | 197.9 | 196.7 | 6.11 | 3.01 |
| Anisole | 199 | 198.4 | 198.3 | 0.7 | 0.35 |
| Cyclopentyl methyl sulfide | 193.18 | 198.7 | 198.6 | -5.42 | -2.81 |
| Quinoline | 199.2 | 198.8 |  | 0.4 | 0.2 |
| Methyl t-butyl sulfide | 199.95 | 199.2 | 199.4 | 0.55 | 0.28 |
| 1,1,1-Trichloro-3,3,3-trifluoropropane | 199.91 | 199.4 | 199.6 | 0.31 | 0.16 |
| t-Amyl mercaptan | 198.15 | 199.7 | 200.6 | -2.45 | -1.24 |
| Methyl cyclobutanecarboxylate | 190.8 | 200.1 | 200.8 | -10 | -5.24 |
| 4-Methylpent-3-en-2-one | 212.5 | 200.2 | 200.2 | 12.3 | 5.79 |
| Ethyl propyl sulfide | 198.41 | 200.6 | 200.6 | -2.19 | -1.1 |
| Propylenediamine | 205.64 | 200.6 | 200.9 | 4.74 | 2.3 |
| 3-Methyl-2-butanethiol | 198.95 | 200.7 | 201.1 | -2.15 | -1.08 |
| 2-Chloroaniline | 199 | 201 | 201.2 | -2.2 | -1.11 |
| 3-Chloroaniline | 198.7 | 201 | 201 | -2.3 | -1.16 |
| Isobutyl formate | 214.2 | 201.3 | 199.4 | 14.8 | 6.91 |
| 2-Methyl-1-butanethiol | 200.7 | 201.6 | 201.6 | -0.9 | -0.45 |
| 3-Methyl-1-butanethiol | 200.33 | 201.6 | 201.6 | -1.27 | -0.63 |
| 2-Chloronitrobenzene | 212.3 | 201.7 | 201.2 | 11.1 | 5.23 |
| Diethyl disulfide | 204.01 | 202.2 | 201.8 | 2.21 | 1.08 |
| 1,3-Diaminopropane | 204.4 | 202.3 | 203.2 | 1.2 | 0.59 |
| Hexamethylenimine | 205 | 202.4 | 201.6 | 3.4 | 1.66 |
| 2,3-Dihydrobenzofuran | 188.64 | 202.8 | 203.1 | -14.46 | -7.67 |
| n-Butylmethylsulfide | 200.92 | 203.1 | 203.5 | -2.58 | -1.28 |
| Isopropylnitrate | 191.1 | 203.1 |  | -12 | -6.28 |
| n-Butylformate | 200.25 | 203.2 | 202.8 | -2.55 | -1.27 |
| Trimethylvinylsilane | 198 | 203.2 | 206 | -8 | -4.04 |
| 1-Pentanethiol | 200.4 | 203.6 | 204 | -3.6 | -1.8 |
| 1,5-Cyclooctadiene | 208.1 | 203.8 | 203.6 | 4.5 | 2.16 |
| Cyclopentanol | 185.4 | 204.2 | 204.9 | -19.5 | -10.52 |
| 4-Methylpiperidine | 209 | 204.4 | 205.3 | 3.7 | 1.77 |
| 2-Methylpiperidine | 205 | 204.6 | 205.1 | -0.1 | -0.05 |
| N,N-Dimethylpropionamide | 209 | 204.6 | 201.7 | 7.3 | 3.49 |
| 2-Acetylthiophene | 210.7 | 204.7 |  | 6 | 2.85 |
| Pinacolone | 206.9 | 206.2 | 206.5 | 0.4 | 0.19 |
| cis- Cyclooctene | 207.8 | 206.4 | 205.9 | 1.9 | 0.91 |
| Ethyl cyanoacetate | 220.22 | 206.5 | 205.6 | 14.62 | 6.64 |
| Pentafluorobenzene | 210.79 | 207.3 | 207.4 | 3.39 | 1.61 |
| N-(1-Methylethyl)ethanamide | 211 | 207.5 | 203.6 | 7.4 | 3.51 |
| Benzylamine | 207.18 | 207.7 | 208.7 | -1.52 | -0.73 |
| 2-Butanol | 196.67 | 207.7 | 207.8 | -11.13 | -5.66 |
| o-Toluidine | 209.6 | 208.2 | 208.4 | 1.2 | 0.57 |
| m-Toluidine | 216.7 | 208.2 | 205.7 | 11 | 5.08 |
| 1,1-Dimethylcyclohexane | 209.24 | 208.6 | 208.8 | 0.44 | 0.21 |
| Tetramethylene glycol | 203.79 | 208.7 | 208.9 | -5.11 | -2.51 |
| Acetophenone | 205.5 | 208.8 | 209.1 | -3.6 | -1.75 |
| 3-Nitrotoluene | 202.5 | 208.9 | 209.1 | -6.6 | -3.26 |
| 2-Nitrotoluene | 202.1 | 208.9 | 209.4 | -7.3 | -3.61 |
| N-Methylaniline | 207.1 | 209 | 210.2 | -3.1 | -1.5 |
| Cyclooctane | 215.53 | 209 | 207.4 | 8.13 | 3.77 |
| 3-Dimethylaminopropanenitrile | 212.5 | 209.1 | 209.3 | 3.2 | 1.51 |
| Ethyl cyclopropanecarboxylate | 213 | 209.1 | 209.7 | 3.3 | 1.55 |
| Propylacetamide | 207.94 | 209.2 | 209.6 | -1.66 | -0.8 |
| Benzyl alcohol | 215.9 | 209.8 | 209.7 | 6.2 | 2.87 |
| N,2-Dimethylpropanamide | 209.2 | 210 | 211.1 | -1.9 | -0.91 |
| Acetylacetone (enol form) | 208.4 | 210.3 | 232 | -23.6 | -11.32 |
| Ethylidenecyclohexane | 203.8 | 210.5 | 210.4 | -6.6 | -3.24 |
| Allylcyclopentane | 202.9 | 210.5 | 210 | -7.1 | -3.5 |
| alpha-Methylstyrene | 202.1 | 210.5 | 210.1 | -8 | -3.96 |
| Tetrahydrofurfuryl alcohol | 190 | 210.7 | 211.4 | -21.4 | -11.26 |
| Suberone | 211.8 | 210.9 | 211.1 | 0.7 | 0.33 |
| 3-Chlorophenol | 211 | 211.4 | 212.3 | -1.3 | -0.62 |
| 2-Chlorophenol | 217.5 | 211.4 | 210.4 | 7.1 | 3.26 |
| 1,2,4-Trimethylbenzene | 213.11 | 211.8 | 211.7 | 1.41 | 0.66 |
| 1,3,5-Trimethylbenzene | 207.85 | 211.8 | 212.4 | -4.55 | -2.19 |
| Hemimellitene | 216.44 | 211.8 | 211.1 | 5.34 | 2.47 |
| N-Methylbutylamide | 207 | 211.9 | 210.8 | -3.8 | -1.84 |
| 1-Amino-3-methoxypropane | 225.52 | 212 | 211.6 | 13.92 | 6.17 |
| Caproic aldehyde | 210.4 | 212.1 | 212.4 | -2 | -0.95 |
| Methyl isobutyl ketone | 211.9 | 212.5 | 212.4 | -0.5 | -0.24 |
| Ethylisopropylketone | 187.9 | 212.5 | 213.1 | -25.2 | -13.41 |
| 2-Isopropylthiophene | 211.38 | 212.6 |  | -1.22 | -0.58 |
| N-Ethylmorpholine | 207.32 | 212.9 | 211.2 | -3.88 | -1.87 |
| trans-1,3-Dimethylcyclohexane | 212.84 | 213 | 213.4 | -0.56 | -0.26 |
| cis-1,4-Dimethylcyclohexane | 212.09 | 213 | 213.1 | -1.01 | -0.48 |
| cis-1,2-Dimethylcyclohexane | 210.87 | 213 | 212.9 | -2.03 | -0.96 |
| trans-1,4-Dimethylcyclohexane | 210.25 | 213 | 213.2 | -2.95 | -1.4 |
| trans-1,2-Dimethylcyclohexane | 209.41 | 213 | 212.9 | -3.49 | -1.67 |
| cis-1,3-Dimethylcyclohexane | 209.37 | 213 | 213.4 | -4.03 | -1.92 |
| Amylamine | 218 | 213.3 | 214.5 | 3.5 | 1.61 |
| cis-Hydrindan | 214.18 | 213.4 | 213.6 | 0.58 | 0.27 |
| trans-Hydrindan | 209.7 | 213.4 | 213.6 | -3.9 | -1.86 |
| Isopentyl alcohol | 209.6 | 213.5 | 214.4 | -4.8 | -2.29 |
| 2-Ethoxyethanol | 210.3 | 213.6 | 213.7 | -3.4 | -1.62 |
| Triptane | 213.51 | 214.1 | 214.1 | -0.59 | -0.28 |
| Ethyl dichloroacetate | 209.6 | 214.1 | 215 | -5.4 | -2.58 |
| 1-Chloronaphthalene | 212.6 | 214.4 | 213.4 | -0.8 | -0.38 |
| Butylmethylketone | 213.4 | 214.5 | 214.6 | -1.2 | -0.56 |
| 3-Hexanone | 216.9 | 214.5 | 214.5 | 2.4 | 1.11 |
| 3,3-Bis(chloromethyl)oxetane | 218.8 | 214.6 | 213.4 | 5.4 | 2.47 |
| 1-Ethylpiperidine | 232.06 | 214.7 | 213.8 | 18.26 | 7.87 |
| Ethylcyclohexane | 211.79 | 214.9 | 215 | -3.21 | -1.52 |
| 2-Hydroxybenzaldehyde | 222 | 215.2 | 236.4 | -14.4 | -6.49 |
| 1-Pentanol | 208.14 | 215.4 | 216.2 | -8.06 | -3.87 |
| Cellosolve acetate | 203 | 215.8 | 216.5 | -13.5 | -6.65 |
| 3,3-Dimethylpentane | 214.8 | 216 | 216.2 | -1.4 | -0.65 |
| 1-Heptene | 211.79 | 216 | 216.5 | -4.71 | -2.22 |
| Bis(2-chloroethyl) ether | 220.9 | 216 | 215.7 | 5.2 | 2.35 |
| 2,2-Dimethylpentane | 221.12 | 216 | 215.8 | 5.32 | 2.41 |
| Cumene | 215.4 | 216.8 | 217 | -1.6 | -0.74 |
| Methyl pivalate | 223 | 216.9 | 216.9 | 6.1 | 2.74 |
| 3-Methylbutanoic acid | 197.1 | 216.9 | 217.2 | -20.1 | -10.2 |
| 1,4-Dimethylpiperazine | 210.11 | 217.7 | 218.4 | -8.29 | -3.95 |
| 3,4-Dihydro-1H-2-benzopyran | 217.77 | 217.8 | 218.2 | -0.43 | -0.2 |
| 1,5-Dichloropentane | 213.4 | 217.8 | 218.4 | -5 | -2.34 |
| Tetrahydrodicyclopentadiene | 236.5 | 217.8 | 215.7 | 20.8 | 8.79 |
| 1,5-Dibromopentane | 220.84 | 218 | 216.8 | 4.04 | 1.83 |
| Diethylcarbonate | 218.55 | 218.7 | 219.1 | -0.55 | -0.25 |
| p-Cresol | 221.03 | 218.7 | 218.2 | 2.83 | 1.28 |
| Isocumene | 214.72 | 218.7 | 219.5 | -4.78 | -2.23 |
| m-Cresol | 224.93 | 218.7 | 218.1 | 6.83 | 3.04 |
| o-Cresol | 229.75 | 218.7 | 218.1 | 11.65 | 5.07 |
| Propylcyclopentane | 216.27 | 218.9 | 219.3 | -3.03 | -1.4 |
| Pentanoic acid | 210 | 218.9 | 219.4 | -9.4 | -4.48 |
| Methyl benzoate | 221.3 | 219.5 | 220.8 | 0.5 | 0.23 |
| 1,2,3,4-Tetrahydronaphthalene | 217.44 | 219.6 | 218.9 | -1.46 | -0.67 |
| Ethyl t-butyl ether | 218 | 220.1 | 219.5 | -1.5 | -0.69 |
| 5,6,7,8-Tetrahydroquinoline | 217.41 | 220.2 | 220 | -2.59 | -1.19 |
| Methyl t-pentyl ether | 222 | 220.5 | 220.1 | 1.9 | 0.86 |
| 2,3-Dimethylpentane | 218.3 | 220.5 | 220.9 | -2.6 | -1.19 |
| t-Butyl vinyl ether | 217.6 | 220.5 | 221.2 | -3.6 | -1.65 |
| 2,4-Dimethylpentane | 224.22 | 220.5 | 220.4 | 3.82 | 1.7 |
| Dichlorodiethylsilane | 214.7 | 220.9 |  | -6.2 | -2.89 |
| Isobutyl vinyl ether | 231.8 | 221 | 218.3 | 13.5 | 5.82 |
| Ethyl 2-chloropropionate | 220.5 | 221.1 | 221.6 | -1.1 | -0.5 |
| 1-Chlorohexane | 216.73 | 221.1 | 220.7 | -3.97 | -1.83 |
| Hexyl bromide | 219.7 | 221.2 | 221.2 | -1.5 | -0.68 |
| 2,5-Dioxaheptane | 224.7 | 221.3 | 221 | 3.7 | 1.65 |
| 1-Methylnaphthalene | 224.39 | 221.7 | 219.7 | 4.69 | 2.09 |
| 2-Methylnaphthalene | 228 | 221.7 | 220.9 | 7.1 | 3.11 |
| Triethylamine | 219.9 | 222.1 | 219.9 | 0 | 0 |
| Cinnamaldehyde | 232.6 | 222.1 | 222.1 | 10.5 | 4.51 |
| t-Butylacetate | 231 | 222.3 | 221.5 | 9.5 | 4.11 |
| 2-Methylhexane | 222.92 | 222.4 | 222.6 | 0.32 | 0.14 |
| Hexafluorobenzene | 221.6 | 222.4 | 222.4 | -0.8 | -0.36 |
| 3-Ethylpentane | 219.58 | 222.4 | 222.6 | -3.02 | -1.38 |
| Dipropyl ether | 221.45 | 222.6 | 222.4 | -0.95 | -0.43 |
| Isobutyl acetate | 233.8 | 222.8 | 223 | 10.8 | 4.62 |
| Butyl vinyl ether | 231.8 | 223 | 221.6 | 10.2 | 4.4 |
| Diisopropyl ether | 216.74 | 223.8 | 225.6 | -8.86 | -4.09 |
| 2-Methylquinoline | 224.72 | 224.1 |  | 0.62 | 0.28 |
| Trichlorotoluene | 218.67 | 224.1 | 222.8 | -4.13 | -1.89 |
| Heptane | 225.33 | 224.3 | 224.4 | 0.93 | 0.41 |
| n-Butyl acetate | 225.1 | 224.7 | 224.5 | 0.6 | 0.27 |
| Propyl propanoate | 226.65 | 224.7 | 225.3 | 1.35 | 0.6 |
| Ethyl butanoate | 220.1 | 224.7 | 224.3 | -4.2 | -1.91 |
| 1-Iodohexane | 222.5 | 225 | 225.1 | -2.6 | -1.17 |
| Methyl valerate | 226.11 | 225.2 | 225.3 | 0.81 | 0.36 |
| 8-Methylquinoline | 224.5 | 225.4 |  | -0.9 | -0.4 |
| cis-Bicyclo[6.1.0]nonane | 235.1 | 225.4 | 225.7 | 9.4 | 4 |
| Dimethyl malonate | 210.1 | 226 | 226.5 | -16.4 | -7.81 |
| 2-Methyl-2-propanol | 218.6 | 226.4 | 227.1 | -8.5 | -3.89 |
| Cyclohexyl formate | 219.7 | 226.5 | 227.4 | -7.7 | -3.5 |
| Chloropentafluorobenzene | 223.17 | 226.6 | 226.6 | -3.43 | -1.54 |
| Ethoxybenzene | 228.5 | 228 | 227.9 | 0.6 | 0.26 |
| Heptamethylenimine | 230 | 228.5 | 227.7 | 2.3 | 1 |
| Diisopropyl sulfide | 232 | 228.8 | 229.5 | 2.5 | 1.08 |
| 3,4-Dihydro-2H-1-benzopyran | 214 | 228.9 | 230.8 | -16.8 | -7.85 |
| Ethyl cyclobutanecarboxylate | 213 | 229.7 | 230.5 | -17.5 | -8.22 |
| Ethyl trichloroacetate | 230.1 | 230.1 | 229.7 | 0.4 | 0.17 |
| Cyclohexanol | 213.4 | 230.3 | 230.1 | -16.7 | -7.83 |
| Dipropyl sulfide | 225.48 | 230.6 | 231.2 | -5.72 | -2.54 |
| cis-3-Hexen-1-ol | 234 | 231 | 232 | 2 | 0.85 |
| trans-3-Hexen-1-ol | 237.2 | 231 | 230.6 | 6.6 | 2.78 |
| 1,2-Butanediol | 230.82 | 231.1 | 232.5 | -1.68 | -0.73 |
| 1,3-Butyleneglycol | 218.89 | 231.1 | 232.3 | -13.41 | -6.13 |
| 1,4-Diisocyanatobutane | 225.1 | 231.6 | 236 | -10.9 | -4.84 |
| N,N-Dimethylaniline | 213.4 | 231.8 | 235.9 | -22.5 | -10.54 |
| Lactic acid | 210.5 | 232.3 | 232.1 | -21.6 | -10.26 |
| DL-Lactic acid | 210.5 | 232.3 | 233.7 | -23.2 | -11.02 |
| 2,4,4-Trimethyl-2-nitropentane | 232.5 | 232.5 |  | 0 | 0 |
| Tetramethylurea | 229.6 | 232.8 |  | -3.2 | -1.39 |
| 3-Azabicyclo[3.2.2]nonane | 238.9 | 232.9 | 232.3 | 6.6 | 2.76 |
| Indole-3-carboxyaldehyde | 220.5 | 233.4 | 239.7 | -19.2 | -8.71 |
| 1-Hexanethiol | 230.71 | 233.6 | 233.2 | -2.49 | -1.08 |
| 2,3,4,5,6-Pentafluorotoluene | 225.8 | 233.9 | 235.3 | -9.5 | -4.21 |
| Phenyltrichlorosilane | 220.7 | 234 |  | -13.3 | -6.03 |
| 2,6-Xylidine | 238.86 | 234.8 | 235.2 | 3.66 | 1.53 |
| 2-(Ethylamino)ethanol | 227 | 234.9 | 235.7 | -8.7 | -3.83 |
| 3-Methyl-2-butanol | 245.9 | 235.8 | 235.9 | 10 | 4.07 |
| Cyclohexanemethanol | 236.5 | 236.1 | 236.3 | 0.2 | 0.08 |
| N-Ethylaniline | 239.3 | 236.4 | 235.7 | 3.6 | 1.5 |
| Allylcyclohexane | 233.5 | 236.6 | 236 | -2.5 | -1.07 |
| 2-Methyl-1,2-propanediamine | 234.56 | 236.7 | 235.3 | -0.74 | -0.32 |
| 1,1-Diethoxyethane | 237.7 | 236.9 |  | 0.8 | 0.34 |
| Tetrahydro-2H-pyran-2-methanol | 222 | 236.9 | 237.2 | -15.2 | -6.85 |
| Tetramethyoxysilane | 240.5 | 237 | 237.6 | 2.9 | 1.21 |
| Diethyleneglycol | 243.9 | 237 | 237.4 | 6.5 | 2.67 |
| 3,3-Dimethyl-1-butanol | 236.08 | 237.1 | 237.7 | -1.62 | -0.69 |
| 1,2,3,4-Tetrahydroquinoline | 236.04 | 237.3 | 236.4 | -0.36 | -0.15 |
| 2-Phenylethylamine | 239.24 | 237.8 | 237.7 | 1.54 | 0.64 |
| 3-Pentanol | 239.7 | 237.8 | 237.8 | 1.9 | 0.79 |
| 2,2,3,3-Tetramethylbutane | 232.2 | 237.8 | 237.9 | -5.7 | -2.45 |
| Diisobutylene | 240.2 | 237.9 | 238.1 | 2.1 | 0.87 |
| 3,4-Dimethylpentanal | 235.6 | 238.3 | 239.1 | -3.5 | -1.49 |
| Prehnitene | 244.3 | 238.4 | 236.7 | 7.6 | 3.11 |
| 1,2,4,5-Tetramethylbenzene | 220.1 | 238.4 | 240.1 | -20 | -9.09 |
| Glycidyl isopropyl ether | 259.04 | 238.4 | 237 | 22.04 | 8.51 |
| 3-Nitrobenzotrifluoride | 223.8 | 238.7 | 239.8 | -16 | -7.15 |
| 1,5-Pentanediol | 232.49 | 238.8 | 240.4 | -7.91 | -3.4 |
| 2-Aminoisobutanol | 229.5 | 238.8 | 240.5 | -11 | -4.79 |
| 1-Phenyl-1-propanone | 243.2 | 238.9 | 239.1 | 4.1 | 1.69 |
| Levulinic acid | 246.7 | 239.1 | 238.3 | 8.4 | 3.4 |
| Butylacetamide | 236.89 | 239.3 | 238.5 | -1.61 | -0.68 |
| cis-Decalin | 231.79 | 239.5 | 239.8 | -8.01 | -3.46 |
| trans-Decalin | 229.17 | 239.5 | 239.8 | -10.63 | -4.64 |
| Phenethyl alcohol | 252.64 | 239.8 | 240.3 | 12.34 | 4.88 |
| trans-2-Octene | 239.3 | 240 | 239.9 | -0.6 | -0.25 |
| 3-Methylhexanal | 246 | 240.2 | 239.2 | 6.8 | 2.76 |
| t-Butylbenzene | 241.59 | 240.4 | 239.7 | 1.89 | 0.78 |
| Nitrocyclohexane | 258.32 | 240.6 |  | 17.72 | 6.86 |
| 2,4-Dimethyl-3-pentanone | 233.7 | 240.7 | 241.1 | -7.4 | -3.17 |
| Dimethyl maleate | 263.2 | 241.6 | 239.6 | 23.6 | 8.97 |
| N-Methylvaleramide | 238.4 | 241.9 | 242.6 | -4.2 | -1.76 |
| n-Heptaldehyde | 230.78 | 242.2 | 242.7 | -11.92 | -5.17 |
| 4-Octyne | 233.6 | 242.2 | 247.6 | -14 | -5.99 |
| 2-Methyl-3-hexanone | 241.5 | 242.6 | 242.4 | -0.9 | -0.37 |
| Biphenyl | 250.9 | 243.1 | 242.9 | 8 | 3.19 |
| p-Cymene | 242.3 | 243.4 | 243.4 | -1.1 | -0.45 |
| n-Hexylamine | 246 | 243.4 | 243.1 | 2.9 | 1.18 |
| 2-Ethyl-1-butanol | 246.65 | 243.5 | 243.2 | 3.45 | 1.4 |
| Butanedioic acid | 238.6 | 243.5 | 243 | -4.4 | -1.84 |
| Bicyclopentyl | 238.9 | 243.5 | 243.4 | -4.5 | -1.88 |
| 2-Methyl-1-pentanol | 248.4 | 243.5 | 243.5 | 4.9 | 1.97 |
| 2-Propoxyethanol | 241.6 | 243.7 | 243.3 | -1.7 | -0.7 |
| Dipropylamine | 252.7 | 243.8 | 243.5 | 9.2 | 3.64 |
| Isooctane | 242.49 | 244.1 | 243.8 | -1.31 | -0.54 |
| 2,3,3-Trimethylpentane | 245.56 | 244.1 | 244 | 1.56 | 0.64 |
| 2,2,3-Trimethylpentane | 245.6 | 244.1 | 244 | 1.6 | 0.65 |
| 2-Isopropoxyethanol | 238.8 | 244.3 | 244.7 | -5.9 | -2.47 |
| 2-Heptanone | 243.6 | 244.5 | 244.2 | -0.6 | -0.25 |
| 4-Heptanone | 246.3 | 244.5 | 244 | 2.3 | 0.93 |
| Ethyl acetoacetate | 241.8 | 244.9 | 245.7 | -3.9 | -1.61 |
| Propylcyclohexane | 242.04 | 245 | 245 | -2.96 | -1.22 |
| 1,1-Dimethylindane | 249.4 | 245.2 | 244.5 | 4.9 | 1.96 |
| Methyl levulinate | 231.1 | 245.3 | 246 | -14.9 | -6.45 |
| 1-Hexanol | 242.7 | 245.4 | 246.2 | -3.5 | -1.44 |
| Caprylene | 241.21 | 246 | 246.1 | -4.89 | -2.03 |
| 3,3-Dimethylhexane | 246.6 | 246.1 | 246.5 | 0.1 | 0.04 |
| Methyl m-toluate | 248.7 | 246.1 | 245.9 | 2.8 | 1.13 |
| Methyl o-toluate | 242.5 | 246.1 | 246.3 | -3.8 | -1.57 |
| 3-(Dimethylamino)propylamine | 248.71 | 246.4 | 249.1 | -0.39 | -0.16 |
| n-Butyl acrylate | 251 | 246.4 | 246.2 | 4.8 | 1.91 |
| Ethyl pivalate | 251.5 | 246.5 | 246.2 | 5.3 | 2.11 |
| 4,7-Dimethylindane | 241.5 | 246.6 | 247.4 | -5.9 | -2.44 |
| 4,6-Dimethylindane | 240.9 | 246.6 | 247.1 | -6.2 | -2.57 |
| Dihydropinene | 251.26 | 247.5 | 246.8 | 4.46 | 1.78 |
| 1,6-Dichlorohexane | 240.39 | 247.8 | 248.9 | -8.51 | -3.54 |
| Ethyl 2,3-dichloropropionate | 248.9 | 247.9 | 248.2 | 0.7 | 0.28 |
| Cyclohexyl acetate | 245.4 | 247.9 | 247.6 | -2.2 | -0.9 |
| 4-Methoxyaniline | 236 | 248.1 | 250.9 | -14.9 | -6.31 |
| 2,7-Dimethylnaphthalene | 251.85 | 248.3 | 248.4 | 3.45 | 1.37 |
| 2,3,4-Trimethylpentane | 247.32 | 248.6 | 249 | -1.68 | -0.68 |
| Butylbenzene | 243.5 | 248.7 | 248.4 | -4.9 | -2.01 |
| Butylcyclopentane | 245.35 | 248.9 | 248.1 | -2.75 | -1.12 |
| n-Hexanoic acid | 225.1 | 248.9 | 248.6 | -23.5 | -10.44 |
| Benzyl acetate | 250.2 | 249.1 | 249.2 | 1 | 0.4 |
| Ethyl benzoate | 246 | 249.1 | 250.5 | -4.5 | -1.83 |
| 1,1-Dimethoxy-3-cyanopropane | 253.6 | 249.5 |  | 4.1 | 1.62 |
| Trimethylethylenediamine | 255.6 | 249.5 | 248.7 | 6.9 | 2.7 |
| Ethyl t-amyl ether | 243 | 250.2 | 251 | -8 | -3.29 |
| 2,5-Dimethylhexane | 249.2 | 250.5 | 250.3 | -1.1 | -0.44 |
| 1-Octyne | 242.14 | 250.7 | 252.8 | -10.66 | -4.4 |
| Diethyl cellosolve | 259.4 | 250.9 | 250.8 | 8.6 | 3.32 |
| 1-Chloroheptane | 245.71 | 251.1 | 251.7 | -5.99 | -2.44 |
| Heptyl bromide | 249.41 | 251.2 | 251.1 | -1.69 | -0.68 |
| 2,5-Dioxaoctane | 248.9 | 251.3 | 251.3 | -2.4 | -0.96 |
| Phthaloyl chloride | 248.5 | 252.2 | 256.7 | -8.2 | -3.3 |
| 2,4-Dibromophenol | 259.4 | 252.2 | 250.8 | 8.6 | 3.32 |
| 2-Methylheptane | 252 | 252.4 | 252.7 | -0.7 | -0.28 |
| 4-Methylheptane | 251.08 | 252.4 | 252.4 | -1.32 | -0.53 |
| 3-Methylheptane | 250.2 | 252.4 | 252.4 | -2.2 | -0.88 |
| 3-Carene | 254.26 | 252.5 | 251.6 | 2.66 | 1.05 |
| Isoamyl acetate | 251.2 | 252.8 | 253.3 | -2.1 | -0.84 |
| Dimethyl methylmalonate | 261.7 | 254.1 | 254 | 7.7 | 2.94 |
| Octane | 255.68 | 254.4 | 254.4 | 1.28 | 0.5 |
| Ethyl pentanoate | 256.81 | 254.8 | 254.7 | 2.11 | 0.82 |
| Amyl acetate | 276.1 | 254.8 | 254.8 | 21.3 | 7.71 |
| 1-Iodoheptane | 251.8 | 255 | 255.4 | -3.6 | -1.43 |
| Diethyl oxalate | 260.7 | 255.2 | 255 | 5.7 | 2.19 |
| Methyl hexanoate | 245.3 | 255.2 | 254.8 | -9.5 | -3.87 |
| Ethanediol diacetate | 269.2 | 255.2 | 254 | 15.2 | 5.65 |
| 1-Ethyl-3-methylimidazolium bromide | 264.8 | 256.4 | 254.9 | 9.9 | 3.74 |
| Cycloheptanol | 250.22 | 256.5 | 256 | -5.78 | -2.31 |
| 2-Methyl-2-butanol | 247.3 | 256.5 | 257.5 | -10.2 | -4.12 |
| Pentafluoronitrobenzene | 272.96 | 257.6 | 254.5 | 18.46 | 6.76 |
| Ethyl N,N-dimethylglycinate | 244.2 | 257.8 | 258.9 | -14.7 | -6.02 |
| Diethanolamine | 251.3 | 258.3 | 258.1 | -6.8 | -2.71 |
| trans-2-Methylcyclohexanol | 262.98 | 258.4 | 257.6 | 5.38 | 2.05 |
| cis-2-Methylcyclohexanol | 268.95 | 258.4 | 257.6 | 11.35 | 4.22 |
| N,N-Dimethyl-o-toluidine | 280.3 | 258.4 | 256.4 | 23.9 | 8.53 |
| 2-Methoxyphenol | 240 | 258.5 | 261.8 | -21.8 | -9.08 |
| 2,4-Dinitrotoluene | 255.2 | 259.3 | 260.4 | -5.2 | -2.04 |
| trans-Decahydroquinoline | 254.81 | 259.3 | 260.2 | -5.39 | -2.12 |
| 1-Hexen-3-ol | 269.3 | 259.5 | 258.4 | 10.9 | 4.05 |
| Sulcatone | 268.8 | 260.3 | 260.7 | 8.1 | 3.01 |
| Diglycolamine | 246.84 | 260.7 | 263.1 | -16.26 | -6.59 |
| s-Phenethyl alcohol | 257.45 | 262.2 | 262.5 | -5.05 | -1.96 |
| Dipropyl disulfide | 262.46 | 262.3 | 261.8 | 0.66 | 0.25 |
| 1-Amino-2-(2-hydroxyethoxy)ethane | 258.6 | 262.7 | 263 | -4.4 | -1.7 |
| 2-(Isopropylamino)ethanol | 258.82 | 263.2 | 262.7 | -3.88 | -1.5 |
| Perfluorotoluene | 262.3 | 263.7 | 264.4 | -2.1 | -0.8 |
| 1-Heptanethiol | 259.32 | 263.7 | 264 | -4.68 | -1.8 |
| 2,4,6-Trimethyl-2-cyclohexen-1-one | 258.6 | 264.7 | 265.1 | -6.5 | -2.51 |
| Camphor | 271.2 | 264.7 | 263.7 | 7.5 | 2.77 |
| 2,5,6-Trimethyl-2-cyclohexen-1-one | 258.4 | 264.7 | 265.9 | -7.5 | -2.9 |
| Veratrole | 274 | 264.8 | 267.2 | 6.8 | 2.48 |
| 1,3-Dimethyladamantane | 258.31 | 265.1 | 265.5 | -7.19 | -2.78 |
| 4-Ethylacetophenone | 260.7 | 265.5 | 265.4 | -4.7 | -1.8 |
| Butanoic anhydride | 283.7 | 265.5 | 264.9 | 18.8 | 6.63 |
| 4-Methyl-2-pentanol | 272.34 | 265.9 | 266.1 | 6.24 | 2.29 |
| 3-Methyl-2-pentanol | 275.89 | 265.9 | 264.9 | 10.99 | 3.98 |
| Cyclohexaneethanol | 266 | 266.1 | 266 | 0 | 0 |
| Fenchone | 269.8 | 266.3 | 265 | 4.8 | 1.78 |
| t-Butylcyclohexane | 264.8 | 266.7 | 266.3 | -1.5 | -0.57 |
| 3-Phenylpropylamine | 265.59 | 267.8 | 267.1 | -1.51 | -0.57 |
| 3-Hexanol | 269.27 | 267.8 | 267.5 | 1.77 | 0.66 |
| 2,2,4,4-Tetramethylpentane | 266.3 | 267.8 | 268.6 | -2.3 | -0.86 |
| 2,2,3,3-Tetramethylpentane | 271.5 | 267.8 | 266.7 | 4.8 | 1.77 |
| 2-Hexanol | 256.31 | 267.8 | 267.8 | -11.49 | -4.48 |
| Ethyl lactate | 254 | 268.2 | 268.3 | -14.3 | -5.63 |
| Bis(2-hydroxyethyl)methylamine | 262.2 | 269.2 | 269.2 | -7 | -2.67 |
| N-Cyclopentylpiperidine | 282.02 | 269.5 | 263 | 19.02 | 6.74 |
| 2-Phenyltoluene | 275.77 | 269.7 | 268.9 | 6.87 | 2.49 |
| 1-Phenyl-1-methylsilacyclobutane | 273.2 | 269.8 | 270.4 | 2.8 | 1.02 |
| Hydrocinnamyl alcohol | 280.74 | 269.9 | 268.3 | 12.44 | 4.43 |
| 2-Ethylhexanal | 267.8 | 270.3 | 270.7 | -2.9 | -1.08 |
| Neopentylbenzene | 271.9 | 270.5 | 270.4 | 1.5 | 0.55 |
| 1-Methyl-4-isopropylcyclohexene | 257.8 | 270.6 | 271.9 | -14.1 | -5.47 |
| 2-t-Butoxyethanol | 273.45 | 271.3 | 270.1 | 3.35 | 1.23 |
| 1-Ethyladamantane | 258.45 | 271.5 | 270.3 | -11.85 | -4.59 |
| Diphenyl ether | 268.6 | 272.1 | 272.1 | -3.5 | -1.3 |
| Caprylic aldehyde | 259.4 | 272.2 | 272.7 | -13.3 | -5.13 |
| 1,8-Cineole | 270.72 | 272.7 | 272.2 | -1.48 | -0.55 |
| Diphenylmethane | 266.1 | 273.2 | 273.4 | -7.3 | -2.74 |
| 2-(Phenoxymethyl)oxirane | 276 | 273.3 | 273.1 | 2.9 | 1.05 |
| 2-Diethylaminoethanol | 281.2 | 273.3 | 269.4 | 11.8 | 4.2 |
| Pentanedioic acid | 270.5 | 273.5 | 273.6 | -3.1 | -1.15 |
| Butylcellosolve | 271.66 | 273.7 | 273.5 | -1.84 | -0.68 |
| 2-Octanone | 273.26 | 274.6 | 274.8 | -1.54 | -0.56 |
| Ethyl levulinate | 276.4 | 275 | 274.9 | 1.5 | 0.54 |
| Butylcyclohexane | 271.04 | 275 | 275 | -3.96 | -1.46 |
| 2-Acetoxyanisole | 278.5 | 275.1 | 277.1 | 1.4 | 0.5 |
| Ethyl cyclohexanecarboxylate | 271.5 | 275.4 | 274.8 | -3.3 | -1.22 |
| 1-Heptanol | 274.81 | 275.5 | 274.5 | 0.31 | 0.11 |
| Tetraethylmethane | 278.2 | 276.1 | 275.8 | 2.4 | 0.86 |
| 1-Nonene | 270.36 | 276.1 | 276.6 | -6.24 | -2.31 |
| n-Butylmethacrylate | 273.8 | 276.6 | 277.2 | -3.4 | -1.24 |
| Di-t-butyl ether | 276.1 | 277.7 | 278.7 | -2.6 | -0.94 |
| Methyl dimethylmalonate | 259.3 | 277.8 | 279.1 | -19.8 | -7.64 |
| Diisobutyl ether | 276.08 | 278.8 | 278.3 | -2.22 | -0.8 |
| Dipropyl carbonate | 275.55 | 278.8 | 279.5 | -3.95 | -1.43 |
| Enanthic acid | 267.31 | 279 | 279.2 | -11.89 | -4.45 |
| 1-Methylcyclohexanol | 279.05 | 279.1 | 279.6 | -0.55 | -0.2 |
| 2-Phenoxyethanol | 294.63 | 279.2 | 277.9 | 16.73 | 5.68 |
| Dimethylphenylvinylsilane | 284.8 | 279.4 | 274.1 | 10.7 | 3.76 |
| Diethylene glycol dimethyl ether | 274.1 | 280 | 280.6 | -6.5 | -2.37 |
| 1-Chlorooctane | 275.03 | 281.2 | 281.2 | -6.17 | -2.24 |
| 1-Bromooctane | 272.16 | 281.3 | 281.3 | -9.14 | -3.36 |
| 2,5-Dioxanonane | 282 | 281.4 | 281 | 1 | 0.35 |
| Di-n-butylether | 278.16 | 282.7 | 282.4 | -4.24 | -1.52 |
| 1,2,3,4-Tetrahydrophenanthrene | 278.26 | 282.7 | 283 | -4.74 | -1.7 |
| Isopentyl propionate | 285.2 | 282.9 | 282.9 | 2.3 | 0.81 |
| Di-t-butylsulfide | 281.74 | 283 | 283.4 | -1.66 | -0.59 |
| 1-Piperazineethanamine | 284.9 | 283.3 | 280.3 | 4.6 | 1.61 |
| Nonane | 284.43 | 284.4 | 285 | -0.57 | -0.2 |
| n-Hexylacetate | 282.8 | 284.8 | 285.4 | -2.6 | -0.92 |
| Butyl butanoate | 282 | 284.8 | 284.9 | -2.9 | -1.03 |
| Diethyl malonate | 285 | 285.2 | 284.1 | 0.9 | 0.32 |
| Methylenanthate | 285.1 | 285.3 | 284.6 | 0.5 | 0.18 |
| 2-Piperidineethanol | 289.02 | 285.8 | 285.3 | 3.72 | 1.29 |
| 2-Methyl-2-pentanol | 289.03 | 286.5 | 287.8 | 1.23 | 0.43 |
| 1-Propyl-3-methylimidazolium bromide | 281.4 | 286.5 | 287.4 | -6 | -2.13 |
| 3-Methyl-3-pentanol | 293.3 | 286.5 | 284.4 | 8.9 | 3.03 |
| N,N-Diethylaniline | 274.5 | 286.6 | 284.9 | -10.4 | -3.79 |
| Ethyl salicylate | 283.07 | 287.9 | 308.6 | -25.53 | -9.02 |
| Carvone | 279.34 | 288.5 | 288.7 | -9.36 | -3.35 |
| Di-n-butylsulfide | 284.34 | 290.7 | 290.2 | -5.86 | -2.06 |
| Tolane | 297.5 | 291.1 | 288.3 | 9.2 | 3.09 |
| 1,2-Hexanediol | 293.1 | 291.2 | 290.8 | 2.3 | 0.78 |
| 1,6-Hexamethylene diisocyanate | 294 | 291.7 | 289.9 | 4.1 | 1.39 |
| Pulegone | 284.5 | 292.9 | 293.9 | -9.4 | -3.3 |
| Benzophenone | 289.59 | 293.4 | 294.9 | -5.31 | -1.83 |
| 1-Octanethiol | 300.4 | 293.7 | 293.2 | 7.2 | 2.4 |
| 2,4-Dimethyl-3-pentanol | 312 | 294 | 293.2 | 18.8 | 6.03 |
| 1-(2-Aminoethyl)-4-methylpiperazine | 291.6 | 294.2 | 293.8 | -2.2 | -0.75 |
| Ethyl trans-cinnamate | 296.36 | 294.9 | 294.8 | 1.56 | 0.53 |
| 1,1-Diphenylethylene | 299.2 | 295 | 293.7 | 5.5 | 1.84 |
| N-Cyclohexylpiperidine | 287.76 | 295.7 | 295.1 | -7.34 | -2.55 |
| Bicyclohexyl | 283 | 295.7 | 295.9 | -12.9 | -4.56 |
| 5-Methyl-2-hexanol | 295.2 | 295.9 | 297.1 | -1.9 | -0.64 |
| Cyclohexanepropanol | 293 | 296.2 | 295.3 | -2.3 | -0.78 |
| 3,3'-Bitolyl | 295.45 | 296.3 | 295 | 0.45 | 0.15 |
| 2,2'-Dimethylbiphenyl | 298.06 | 296.3 | 295.8 | 2.26 | 0.76 |
| 2-Hydroxyethyl-2',2'-dimethylpropionate | 308 | 297.6 | 297.2 | 10.8 | 3.51 |
| 2-Heptanol | 298.63 | 297.9 | 297.9 | 0.73 | 0.24 |
| 4-Heptanol | 306.77 | 297.9 | 298.1 | 8.67 | 2.83 |
| 3-Heptanol | 314.2 | 297.9 | 297.9 | 16.3 | 5.19 |
| 2,3-Dihydro-1,1,4,6-tetramethyl-1H-indene | 299.6 | 298.4 | 298.5 | 1.1 | 0.37 |
| 1,1,4,7-Tetramethylindane | 302.5 | 298.4 | 297.5 | 5 | 1.65 |
| N-Methyldiphenylamine | 301.2 | 298.7 | 281.8 | 19.4 | 6.44 |
| 1,7-Heptanediol | 297 | 298.9 | 298.8 | -1.8 | -0.61 |
| L-Menthone | 290.8 | 299.2 | 299 | -8.2 | -2.82 |
| Benzhydryl chloride | 290.4 | 299.6 | 301.4 | -11 | -3.79 |
| 2-Methyldiphenylmethane | 296.58 | 299.8 | 299.2 | -2.62 | -0.88 |
| 2-Ethylbiphenyl | 302.73 | 299.8 | 298.9 | 3.83 | 1.27 |
| 1-Ethyl-3-methylimidazolium thiocyanate | 281.45 | 300 |  | -18.55 | -6.59 |
| 2,6-Dimethylheptan-4-one | 297.3 | 300.8 | 300.4 | -3.1 | -1.04 |
| 1,1-Diphenylethane | 295 | 301.3 | 301.2 | -6.2 | -2.1 |
| Tetraethylsilane | 297.7 | 301.9 | 305.4 | -7.7 | -2.59 |
| n-Nonanal | 290.4 | 302.3 | 302.9 | -12.5 | -4.3 |
| 1,2-Diphenylethane | 320.1 | 303.2 | 301.9 | 18.2 | 5.69 |
| n-Octylamine | 302 | 303.5 | 303.2 | -1.2 | -0.4 |
| 5-Methyl-1-heptanol | 304.2 | 303.6 | 303.4 | 0.8 | 0.26 |
| 2-Methyl-1-heptanol | 313 | 303.6 | 303.9 | 9.1 | 2.91 |
| 2-Ethyl-1-hexanol | 317.5 | 303.6 | 302.8 | 14.7 | 4.63 |
| Neral | 304.6 | 303.8 | 304.8 | -0.2 | -0.07 |
| Di-n-butylamine | 292.9 | 303.9 | 304.8 | -11.9 | -4.06 |
| 5-Nonanone | 303.6 | 304.6 | 304.4 | -0.8 | -0.26 |
| Propyl levulinate | 317 | 305 | 304.3 | 12.7 | 4.01 |
| Hexamethyldisiloxane | 311.3 | 305.3 |  | 6 | 1.93 |
| 1-Octanol | 312.1 | 305.5 | 306.4 | 5.7 | 1.83 |
| cis,trans,trans-1,5,9-Cyclododecatriene | 287.76 | 305.6 | 308.3 | -20.54 | -7.14 |
| 1-Decene | 300.83 | 306.1 | 306.1 | -5.27 | -1.75 |
| Dimethyl phthalate | 303.1 | 307.1 | 306.4 | -3.3 | -1.09 |
| 1-Ethyl-3-methylimidazolium tetrafluoroborate | 308.1 | 307.6 | 310.5 | -2.4 | -0.78 |
| Cyclohexyl butanoate | 300.7 | 308 | 308.9 | -8.2 | -2.73 |
| n-Octanoic acid | 304 | 309 | 309.3 | -5.3 | -1.74 |
| Ethyl hydrocinnamate | 286.6 | 309.2 | 309.1 | -22.5 | -7.85 |
| 2,4,5-Trinitrotoluene | 311.7 | 309.6 | 312.8 | -1.1 | -0.35 |
| 1,2-Dipropoxyethane | 309 | 311 | 310.7 | -1.7 | -0.55 |
| 1-Chlorononane | 296.44 | 311.2 | 311.7 | -15.26 | -5.15 |
| 1-Bromononane | 308.32 | 311.3 | 311.4 | -3.08 | -1 |
| Tripropylamine | 301 | 312.3 | 311.3 | -10.3 | -3.42 |
| 2-Methylnonane | 313.3 | 312.5 | 312.7 | 0.6 | 0.19 |
| 5-Methylnonane | 314.43 | 312.5 | 312.3 | 2.13 | 0.68 |
| 3-Methylnonane | 308.99 | 312.5 | 312.9 | -3.91 | -1.27 |
| 4-Methylnonane | 317.36 | 312.5 | 312.9 | 4.46 | 1.41 |
| 1-Ethyl-3-methylimidazolium dicyanamide | 314.64 | 313 | 313.2 | 1.44 | 0.46 |
| Decane | 316.32 | 314.5 | 314.1 | 2.22 | 0.7 |
| Benzyldimethylvinylsilane | 312.2 | 314.5 | 316.7 | -4.5 | -1.44 |
| Di-t-butyldisulfide | 313.63 | 314.6 | 316.1 | -2.47 | -0.79 |
| Pentyl butyrate | 311.7 | 314.9 | 314.9 | -3.2 | -1.03 |
| Methyl octanoate | 314.23 | 315.3 | 314.6 | -0.37 | -0.12 |
| Diethyl succinate | 330.5 | 315.3 | 315.1 | 15.4 | 4.66 |
| Ethylene glycol dipropionate | 331.8 | 315.3 | 315.2 | 16.6 | 5 |
| 1-Butyl-3-methylimidazolium bromide | 316.7 | 316.5 | 316.6 | 0.1 | 0.03 |
| 1-Butyl-3-methylimidazolium chloride | 317 | 316.5 | 316.4 | 0.6 | 0.19 |
| 1-Butyl-3-methylimidazolium iodide | 314 | 316.5 | 315.1 | -1.1 | -0.35 |
| 2-Methyl-2-hexanol | 313.54 | 316.6 | 314.4 | -0.86 | -0.27 |
| 3-Methylbenzophenone | 325.1 | 320 | 319.1 | 6 | 1.85 |
| Triethanolamine | 309.27 | 320 | 321.9 | -12.63 | -4.08 |
| Dipropylene glycol | 322.1 | 320.1 | 320.6 | 1.5 | 0.47 |
| Diphenylmethylamine | 301.2 | 320.6 | 324 | -22.8 | -7.57 |
| 1-Ethyl-3-methylimidazolium acetate | 321.9 | 321.1 | 320.5 | 1.4 | 0.43 |
| 2,5-Dimethyl-3-hexanol | 339.4 | 324.1 | 324.7 | 14.7 | 4.33 |
| Triethyleneglycol | 327.6 | 325.4 | 324.7 | 2.9 | 0.89 |
| 2-Methyl-4-heptanol | 331.8 | 326 | 326.1 | 5.7 | 1.72 |
| 6-Methyl-2-heptanol | 315.1 | 326 | 326.2 | -11.1 | -3.52 |
| 4-Methyl-2-heptanol | 312.5 | 326 | 326 | -13.5 | -4.32 |
| 6-Methyl-3-heptanol | 310.5 | 326 | 326.1 | -15.6 | -5.02 |
| 4-Methyl-3-heptanol | 309.2 | 326 | 325.8 | -16.6 | -5.37 |
| 1,3-Dimethylimidazolium methosulfate | 341 | 326.3 | 322.9 | 18.1 | 5.31 |
| 2-Octanol | 330.1 | 327.9 | 327.6 | 2.5 | 0.76 |
| 4-Octanol | 332.09 | 327.9 | 328.6 | 3.49 | 1.05 |
| 3-Octanol | 338.5 | 327.9 | 327.8 | 10.7 | 3.16 |
| 4-Isopropylbiphenyl | 343.9 | 327.9 | 327.3 | 16.6 | 4.83 |
| Benzyl ether | 307 | 331.5 | 333.1 | -26.1 | -8.5 |
| Capraldehyde | 319.7 | 332.3 | 332.9 | -13.2 | -4.13 |
| N-Methyl-2-hydroxyethylammonium propionate | 328 | 333.3 | 335.9 | -7.9 | -2.41 |
| Heptanedioic acid | 334.3 | 333.6 | 334.2 | 0.1 | 0.03 |
| Butyl 4-oxopentanoate | 333.7 | 335.1 | 335.6 | -1.9 | -0.57 |
| 1-Nonanol | 341 | 335.6 | 334.7 | 6.3 | 1.85 |
| 1-Undecene | 329.95 | 336.2 | 336.7 | -6.75 | -2.05 |
| 4-Allyl-2-methoxyphenol | 343.1 | 336.9 | 334.4 | 8.7 | 2.54 |
| trans-Geraniol | 346.1 | 337.1 | 335.5 | 10.6 | 3.06 |
| 5-Cyano-5H-dibenzo[a,d]cycloheptene | 347.5 | 337.9 | 336.2 | 11.3 | 3.25 |
| Cyclohexyl valerate | 323 | 338.1 | 338.6 | -15.6 | -4.83 |
| Isopulegol | 357.6 | 338.5 | 337.9 | 19.7 | 5.51 |
| Pelargonic acid | 362.37 | 339.1 | 339.7 | 22.67 | 6.26 |
| Diethyleneglycol diethyl ether | 347.5 | 339.3 | 338.7 | 8.8 | 2.53 |
| 1-Ethyltetrahydrothiophenium dicyanamide | 335.38 | 339.6 | 342.9 | -7.52 | -2.24 |
| 1-Benzyl-3-methylimidazolium chloride | 339.4 | 340.9 | 340.3 | -0.9 | -0.27 |
| 1-Chlorodecane | 335.37 | 341.3 | 341.2 | -5.83 | -1.74 |
| 1-Bromodecane | 338.73 | 341.4 | 341.3 | -2.57 | -0.76 |
| Perfluoromethylcyclohexane | 353.1 | 341.4 |  | 11.7 | 3.31 |
| Tetraethylurea | 345.7 | 342.5 |  | 3.2 | 0.93 |
| 2-Methyldecane | 341.21 | 342.6 | 342.2 | -0.99 | -0.29 |
| Undecane | 345.05 | 344.5 | 344 | 1.05 | 0.3 |
| Ethyl caprylate | 343.13 | 344.9 | 345.6 | -2.47 | -0.72 |
| n-Octylacetate | 339.7 | 344.9 | 345.6 | -5.9 | -1.74 |
| Methyl nonanoate | 345.63 | 345.4 | 345.8 | -0.17 | -0.05 |
| 1-Ethyl-3-methylimidazolium methanesulfonate | 345.5 | 345.4 | 331.7 | 13.8 | 3.99 |
| delta-Undecanolactone | 342.7 | 345.9 | 344.7 | -2 | -0.58 |
| 2-Methyl-2-heptanol | 337.6 | 346.6 | 347.7 | -10.1 | -2.99 |
| 4-Methyl-4-heptanol | 366.9 | 346.6 | 344.4 | 22.5 | 6.13 |
| 1-Ethylpyridinium triflate | 351.8 | 348.6 | 348.3 | 3.5 | 0.99 |
| 1,4-Di-t-butylbenzene | 347.84 | 348.9 | 349 | -1.16 | -0.33 |
| beta-Citronellol | 357.9 | 349.5 | 349.4 | 8.5 | 2.37 |
| 1-Ethyl-3-methylimidazolium hexafluorophosphate | 343.6 | 353 | 352.7 | -9.1 | -2.65 |
| 1-Ethyl-3-methylimidazolium methylsulfate | 341 | 353.7 | 355.5 | -14.5 | -4.25 |
| 1-Decanethiol | 350.41 | 353.8 | 354.8 | -4.39 | -1.25 |
| o-Terphenyl | 369.05 | 354.2 | 352.9 | 16.15 | 4.38 |
| 2,3:7,8-Dibenzocycloocta-2,7-dien-1-one | 364.8 | 354.8 | 353.5 | 11.3 | 3.1 |
| Tetraethoxysilane | 364.4 | 355.4 | 352.2 | 12.2 | 3.35 |
| 2,2,4,6,6-Pentamethylheptane | 350.98 | 356 | 356.9 | -5.92 | -1.69 |
| Isoamyl lactate | 364.02 | 356.4 | 356 | 8.02 | 2.2 |
| Dibutyl acetal | 352.2 | 357.1 |  | -4.9 | -1.39 |
| 2-Nonanol | 356.32 | 358 | 359 | -2.68 | -0.75 |
| 4-Nonanol | 367.86 | 358 | 357.8 | 10.06 | 2.73 |
| 5-Nonanol | 370.75 | 358 | 356.8 | 13.95 | 3.76 |
| 3-Nonanol | 373.63 | 358 | 357.6 | 16.03 | 4.29 |
| 1-Butyl-3-methylimidazolium thiocyanate | 385 | 360.1 |  | 24.9 | 6.47 |
| 2-(2-(2-Methoxyethoxy)ethoxy)ethanol | 357.05 | 360.8 | 360.2 | -3.15 | -0.88 |
| 3,7-Dimethyl-1-octanol | 367.21 | 361.8 | 362.1 | 5.11 | 1.39 |
| Diethyleneglycol monobutyl ether | 354.89 | 362.1 | 362.6 | -7.71 | -2.17 |
| beta-Ionone | 382.8 | 362.3 | 360 | 22.8 | 5.96 |
| N-Methyl-2-hydroxyethylammonium butanoate | 361 | 363.4 | 364.5 | -3.5 | -0.97 |
| n-Decylamine | 361 | 363.6 | 363.4 | -2.4 | -0.66 |
| Octanedioic acid | 366.2 | 363.7 | 362.9 | 3.3 | 0.9 |
| 1-Ethyl-3-methylimidazolium trifluoromethylsulfonate | 362.8 | 363.8 | 364 | -1.2 | -0.33 |
| 6-Undecanone | 362.7 | 364.7 | 364.3 | -1.6 | -0.44 |
| 2-Ethylhexyl acrylate | 355.1 | 364.7 | 364.8 | -9.7 | -2.73 |
| Heptylcyclohexane | 363.2 | 365.2 | 365 | -1.8 | -0.5 |
| Hexamethylcyclotrisiloxane | 360 | 365.4 | 367.5 | -7.5 | -2.08 |
| n-Decyl alcohol | 377 | 365.6 | 365.2 | 11.8 | 3.13 |
| 1-Dodecene | 360.66 | 366.2 | 366.4 | -5.74 | -1.59 |
| Diethyl phthalate | 366.1 | 366.3 | 366.2 | -0.1 | -0.03 |
| Diethyl terephthalate | 380.7 | 366.3 | 366.5 | 14.2 | 3.73 |
| 1-Butyl-3-methylimidazolium tetrafluoroborate | 364.8 | 367.7 | 368.2 | -3.4 | -0.93 |
| 2,5,8,11-Tetraoxododecane | 367.78 | 368.4 | 368.3 | -0.52 | -0.14 |
| n-Decanoic acid | 361.1 | 369.1 | 369.7 | -8.6 | -2.38 |
| 1,2-Dibutoxyethane | 350 | 371.1 | 372.3 | -22.3 | -6.37 |
| 1-Bromoundecane | 373.23 | 371.4 | 372.7 | 0.53 | 0.14 |
| 1-Butyl-3-methylimidazolium dicyanoamide | 365 | 373.1 | 374.9 | -9.9 | -2.71 |
| 1-Methoxydecane | 370.8 | 373.3 | 373.3 | -2.5 | -0.67 |
| Tridecanolactone | 398.3 | 374.1 | 374 | 24.3 | 6.1 |
| Dodecane | 376.1 | 374.6 | 374.7 | 1.4 | 0.37 |
| Methyl decanoate | 372.03 | 375.4 | 374.9 | -2.87 | -0.77 |
| Ethylene glycol dibutyrate | 380.3 | 375.4 | 375.4 | 4.9 | 1.29 |
| Glyceryltriacetate | 384.7 | 376.4 | 376.1 | 8.6 | 2.24 |
| 1-Butyl-3-methylpyridinium tetrafluoroborate | 388 | 379.1 | 375.6 | 12.4 | 3.2 |
| 1-Butyl-3-methylimidazolium acetate | 383.2 | 381.2 | 380.1 | 3.1 | 0.81 |
| Pseudoionone | 382.7 | 381.9 | 381.2 | 1.5 | 0.39 |
| 1-Propyl-3-methylimidazolium hexafluorophosphate | 374.4 | 383 | 384.5 | -10.1 | -2.7 |
| 1-Ethyl-3-methylimidazolium ethosulfate | 378 | 383.3 | 383.8 | -5.8 | -1.53 |
| Linalool | 372.4 | 384.1 | 386.6 | -14.2 | -3.81 |
| 2-(2'-Hydroxyethoxy)ethyl pivalate | 368.83 | 386 | 386.6 | -17.77 | -4.82 |
| 5-Decanol | 405.77 | 388 | 387.8 | 17.97 | 4.43 |
| 3,7-Dimethyl-6-octen-1-yn-3-ol | 385.3 | 388.8 | 390.1 | -4.8 | -1.25 |
| 6,10-Dimethyl-4,5,9-undecatrien-2-one | 382.7 | 391.8 | 396.4 | -13.7 | -3.58 |
| 1-Benzyl-3-methylimidazolium tetrafluoroborate | 387.5 | 392.2 | 393.1 | -5.6 | -1.45 |
| Diethylene glycol monopentyl ether | 373.62 | 392.2 | 392.8 | -19.18 | -5.13 |
| N-((2-Aminoethyl)-2-aminoethyl)piperazine | 391 | 392.9 | 392.8 | -1.8 | -0.46 |
| N-Methyl-2-hydroxyethylammonium pentanoate | 401 | 393.4 | 389.5 | 11.5 | 2.87 |
| Nonanedioic acid | 398.1 | 393.7 | 394.1 | 4 | 1 |
| 1-Ethyl-3-methylpyridinium ethylsulfate | 389 | 394.7 | 396.4 | -7.4 | -1.9 |
| 1-Undecanol | 406.34 | 395.7 | 394.8 | 11.54 | 2.84 |
| 1-Tridecene | 391.8 | 396.3 | 396.3 | -4.5 | -1.15 |
| Nonyl acrylate | 417.9 | 396.7 | 396.1 | 21.8 | 5.22 |
| Octyl methacrylate | 386 | 396.8 | 396.8 | -10.8 | -2.8 |
| Dibenzo[a,e]cyclooctene-5,11-dicarbonitrile | 417 | 397.7 | 393.3 | 23.7 | 5.68 |
| 1-Butyl-1-methylpyrrolidinium dicyanamide | 413 | 397.8 | 391.4 | 21.6 | 5.23 |
| n-Undecanoic acid | 415.1 | 399.2 | 398.8 | 16.3 | 3.93 |
| 1,3-Bis(trimethylsilyl)propane | 394.34 | 399.4 | 405.2 | -10.86 | -2.75 |
| 1-Butyltetrahydrothiophenium dicyanamide | 395.19 | 399.7 | 403 | -7.81 | -1.98 |
| 1-Bromododecane | 399.31 | 401.5 | 402.4 | -3.09 | -0.77 |
| Tributylamine | 391.83 | 402.4 | 401.5 | -9.67 | -2.47 |
| Tris-(carboethoxy)methane | 419.8 | 403.9 | 403.8 | 16 | 3.81 |
| Tridecane | 407.1 | 404.6 | 404.1 | 3 | 0.74 |
| Ethyl decanoate | 403.34 | 405 | 405 | -1.66 | -0.41 |
| Butyl octanoate | 397.41 | 405 | 405.7 | -8.29 | -2.09 |
| Hexyl hexanoate | 394.92 | 405 | 405 | -10.08 | -2.55 |
| Octyl butanoate | 383.28 | 405 | 404.5 | -21.22 | -5.54 |
| Methyl undecanoate | 406.24 | 405.5 | 404.9 | 1.34 | 0.33 |
| 1-Butyl-3-methylimidazolium trifluoroacetate | 408.2 | 411 | 412.3 | -4.1 | -1 |
| 1,4-Bis-(1-isocyanato-1-methylethyl)benzene | 415.1 | 411.5 | 402.3 | 12.8 | 3.08 |
| 1-Butyl-3-methylimidazolium hexafluorophosphate | 407.7 | 413.1 | 414.5 | -6.8 | -1.67 |
| 1-Butyl-3-methylimidazolium methosulfate | 416 | 413.8 | 409.9 | 6.1 | 1.47 |
| Tetraglycol | 428.9 | 413.8 | 412.9 | 16 | 3.73 |
| Perfluorobicyclo[4.4.0]dec-1,6-ene | 428.4 | 415.7 | 408.5 | 19.9 | 4.65 |
| 6,10-Dimethyl-2-undecanone | 428.4 | 421 | 420.8 | 7.6 | 1.77 |
| Decanedioic acid | 430 | 423.8 | 423.8 | 6.2 | 1.44 |
| 1-Butyl-3-methylimidazolium trifluoromethylsulfonate | 417 | 423.9 | 425.7 | -8.7 | -2.09 |
| 1-Dodecanol | 438.42 | 425.7 | 426.8 | 11.62 | 2.65 |
| Oxacyclohexadecan-2-one | 444.6 | 426.3 | 423.5 | 21.1 | 4.75 |
| Nonyl methacrylate | 419.3 | 426.9 | 427 | -7.7 | -1.84 |
| 1-Hexyl-3-methylimidazolium tetrafluoroborate | 416 | 427.8 | 430.6 | -14.6 | -3.51 |
| Decylcyclopentane | 426.52 | 429.2 | 429 | -2.48 | -0.58 |
| Lauric acid | 404.28 | 429.2 | 429.9 | -25.62 | -6.34 |
| Tetradecane | 438.9 | 434.7 | 435.5 | 3.4 | 0.77 |
| Octamethyltrisiloxane | 420.6 | 435 |  | -14.4 | -3.42 |
| Dibutyl succinate | 436.24 | 435.5 | 435.2 | 1.04 | 0.24 |
| Methyl laurate | 432.68 | 435.5 | 435.7 | -3.02 | -0.7 |
| 1-Pentyl-3-methylimidazolium hexafluorophosphate | 437.4 | 443.1 | 443.8 | -6.4 | -1.46 |
| 1-Butyl-1-methylpyrrolidinium trifluoromethanesulfonate | 435 | 448.6 | 454.3 | -19.3 | -4.44 |
| Perfluoro-cis-decalin | 449.8 | 451.2 |  | -1.4 | -0.31 |
| Perfluoro-trans-decalin | 446.8 | 451.2 |  | -4.4 | -0.98 |
| Undecanedioic acid | 461.9 | 453.8 | 453.9 | 8 | 1.73 |
| Decylcyclohexane | 455.6 | 455.3 | 454.8 | 0.8 | 0.18 |
| 1-Tridecanol | 476 | 455.8 | 455.2 | 20.8 | 4.37 |
| 2,5,8,11,14-Pentaoxopentadecane | 457.1 | 456.8 | 457.8 | -0.7 | -0.15 |
| Decyl methacrylate | 452.9 | 456.9 | 456.8 | -3.9 | -0.86 |
| Diethyleneglycol-di-n-butylether | 452 | 459.5 | 460.6 | -8.6 | -1.9 |
| 1,4,7,10,13,16-Hexaoxacyclooctadecane | 460 | 459.8 | 458.5 | 1.5 | 0.33 |
| 1H,1H-Perfluorooctan-1-ol | 468.6 | 460.4 | 459.9 | 8.7 | 1.86 |
| 1-Bromotetradecane | 450.86 | 461.6 | 462.6 | -11.74 | -2.6 |
| 4-Cyano-3-fluorophenyl 4-butylbenzoate | 478.16 | 463.4 | 463.4 | 14.76 | 3.09 |
| Pentadecane | 469.9 | 464.7 | 464.5 | 5.4 | 1.15 |
| Ethyl dodecanoate | 464 | 465.1 | 464.5 | -0.5 | -0.11 |
| Methyl tridecanoate | 468.4 | 465.6 | 466.2 | 2.2 | 0.47 |
| Tripropionine | 481.3 | 466.5 | 465.3 | 16 | 3.32 |
| 2,2,4,4,6,8,8-Heptamethylnonane | 458.8 | 467.9 | 470 | -11.2 | -2.44 |
| Tetrapropoxysilane | 460.1 | 475.6 | 479.9 | -19.8 | -4.3 |
| Triethyleneglycol monopentylether | 479.8 | 480.6 | 480.8 | -1 | -0.21 |
| Dodecanedioic acid | 493.8 | 483.9 | 481.9 | 11.9 | 2.41 |
| 1-Hexyl-3-methylimidazolium trifluoromethylsulfonate | 502.3 | 484 | 479.8 | 22.5 | 4.48 |
| Myristyl alcohol | 505.8 | 485.8 | 485.5 | 20.3 | 4.01 |
| 1-Ethyl-3-methylimidazolium toluenesulfonate | 484.2 | 486.3 | 488.2 | -4 | -0.83 |
| Cetene | 485.83 | 486.4 | 486.8 | -0.97 | -0.2 |
| Dibutyl phthalate | 476 | 486.5 | 488.4 | -12.4 | -2.61 |
| Octamethylcyclotetrasiloxane | 495.94 | 487.2 | 478.2 | 17.74 | 3.58 |
| 1-Octyl-3-methylimidazolium tetrafluoroborate | 498 | 487.9 | 486 | 12 | 2.41 |
| N-Ethylpyridinium bis(trifluoromethylsulfonyl)amide | 502.15 | 491.5 | 490.4 | 11.75 | 2.34 |
| Cetane | 501.61 | 494.8 | 494.9 | 6.71 | 1.34 |
| Methyl tetradecanoate | 497.91 | 495.6 | 495.8 | 2.11 | 0.42 |
| Pentaglycol | 515.5 | 502.2 | 500.5 | 15 | 2.91 |
| 1-Heptyl-3-methylimidazolium hexafluorophosphate | 500.6 | 503.2 | 503.6 | -3 | -0.6 |
| Hexaethylcyclohexane | 530.1 | 505.8 | 505.4 | 24.7 | 4.66 |
| 1-Ethyl-3-methylimidazolium bis(trifluoromethanesulfonyl) amide | 500 | 506.7 | 507.8 | -7.8 | -1.56 |
| 1,1,1,3,5,5,5-Heptamethyl-3-phenyltrisiloxane | 519.6 | 511.2 |  | 8.4 | 1.62 |
| 1H,1H-Perfluorononan-1-ol | 515.9 | 511.3 | 510.3 | 5.6 | 1.09 |
| 1,13-Tridecanedioic acid | 525.7 | 513.9 | 513.1 | 12.6 | 2.4 |
| 1-Pentadecanol | 535.1 | 515.9 | 516.1 | 19 | 3.55 |
| Heptadecane | 534.34 | 524.8 | 523.9 | 10.44 | 1.95 |
| Ethyl myristate | 526.32 | 525.2 | 525.3 | 1.02 | 0.19 |
| Methyl pentadecanoate | 523 | 525.7 | 526.4 | -3.4 | -0.65 |
| N,N-Dimethyl-2-pentylnonylamine | 538.1 | 525.9 | 526.4 | 11.7 | 2.17 |
| N-Octylisoquinolinium thiocyanate | 522 | 528.2 |  | -6.2 | -1.19 |
| 1-Ethyl-3-methylimidazolium 2-(2-methoxyethoxy)ethylsulfate | 526 | 530.5 | 531.5 | -5.5 | -1.05 |
| 1-Octyl-3-methylimidazolium hexafluorophosphate | 536.1 | 533.3 | 532.9 | 3.2 | 0.6 |
| 1-Isopropyl-3-methylimidazolium bis(trifluoromethanesulfonyl) amide | 529.9 | 535.1 | 538 | -8.1 | -1.53 |
| N-Ethyl-2-methylpyridinium bis(trifluoromethylsulfonyl)amide | 534.5 | 535.3 | 535.3 | -0.8 | -0.15 |
| 1-Propyl-3-methylimidazolium bis(trifluoromethanesulfonyl) amide | 534.9 | 536.8 | 536 | -1.1 | -0.21 |
| Pentaethylene glycol monomethyl ether | 537.12 | 537.6 | 537.8 | -0.68 | -0.13 |
| 6,10,14-Trimethylpentadeca-3,5-diene-2-one | 555.2 | 542.6 | 541.8 | 13.4 | 2.41 |
| 1,14-Tetradecanedioic acid | 557.6 | 544 | 543.2 | 14.4 | 2.58 |
| Pentaethylene glycol dimethyl ether | 547.4 | 545.2 | 545.2 | 2.2 | 0.4 |
| 1-Hexadecanol | 523.8 | 545.9 | 547.2 | -23.4 | -4.47 |
| 1-Butyl-3-methylimidazolium toluenesulfonate | 548.4 | 546.4 |  | 2 | 0.36 |
| 1-Cyclopropylmethyl-3-methylimidazolium bis(trifluoromethanesulfonyl) amide | 539.1 | 551.2 | 551.9 | -12.8 | -2.37 |
| N-Butylpyridinium bis(trifluoromethanesulfonyl) amide | 566.52 | 551.6 | 551.2 | 15.32 | 2.7 |
| Octadecane | 564.4 | 554.9 | 555 | 9.4 | 1.67 |
| Glyceryl tributanoate | 555.3 | 556.7 | 556.3 | -1 | -0.18 |
| Tetrapropylene glycol | 559.8 | 558.3 | 556.5 | 3.3 | 0.59 |
| Trimethyl butylammonium bis(trifluoromethylsulfonyl)amide | 559.2 | 561.1 | 573.4 | -14.2 | -2.54 |
| 1-Methyl-1-propylpyrrolidinium bis(trifluoromethanesulfonyl) amide | 554 | 561.4 | 562.4 | -8.4 | -1.52 |
| 1H,1H-Perfluorodecan-1-ol | 563.9 | 562.2 | 561.7 | 2.2 | 0.39 |
| 1-Nonyl-3-methylimidazolium hexafluorophosphate | 569.4 | 563.3 | 564.6 | 4.8 | 0.84 |
| 1-Isobutyl-3-methylimidazolium bis(trifluoromethanesulfonyl) amide | 557.1 | 564.9 | 565.9 | -8.8 | -1.58 |
| 1-sec-Butyl-3-methylimidazolium bis(trifluoromethanesulfonyl) amide | 557.1 | 565.1 | 568.1 | -11 | -1.97 |
| 1,2-Diethylpyridinium bis(trifluoromethanesulfonyl) amide | 566.1 | 565.4 | 564.7 | 1.4 | 0.25 |
| N-Propyl-2-methylpyridinium bis(trifluoromethylsulfonyl)amide | 557.96 | 565.4 | 566.2 | -8.24 | -1.48 |
| 1-Butyl-3-methylimidazolium bis(trifluoromethanesulfonyl) amide | 565.9 | 566.8 | 566.7 | -0.8 | -0.14 |
| 1-Isobutyl-3-methylpyridinium bis(trifluoromethylsulfonyl)amide | 579 | 576.3 | 574.4 | 4.6 | 0.79 |
| Pristane | 569.76 | 577.2 | 577.8 | -8.04 | -1.41 |
| N-Butyl-3-methylpyridinium bis(trifluoromethylsulfonyl)amide | 578.1 | 578.2 | 577.2 | 0.9 | 0.16 |
| 1-Chlorooctadecane | 606.7 | 581.7 | 579.8 | 26.9 | 4.43 |
| Trihexylamine | 568.12 | 582.7 | 582.1 | -13.98 | -2.46 |
| Nonadecane | 604 | 584.9 | 584.2 | 19.8 | 3.28 |
| 1-Isobutyl-1-methylpyrrolidinium bis(trifluoromethylsulfonyl)amide | 582.2 | 589.6 | 591.6 | -9.4 | -1.61 |
| 1-Butyl-3-cyanopyridinium bis(trifluoromethylsulfonyl)amide | 586 | 590 | 590.7 | -4.7 | -0.8 |
| 1-Benzyl-3-methylimidazolium bis(trifluoromethylsulfonyl) amide | 607.8 | 591.2 | 591.3 | 16.5 | 2.71 |
| N-Ethyl-4-dimethylaminopyridinium bis(trifluoromethanesulfonyl) amide | 594.3 | 591.3 | 592.2 | 2.1 | 0.35 |
| 1-Butyl-1-methylpyrrolidinium bis(trifluoromethylsulfonyl)amide | 589.3 | 591.5 | 591.8 | -2.5 | -0.42 |
| 1-Butyltetrahydrothiophenium bis(trifluoromethylsulfonyl) amide | 596 | 593.4 | 592.6 | 3.4 | 0.57 |
| 1-Decyl-3-methylimidazolium hexafluorophosphate | 603.3 | 593.4 | 592.2 | 11.1 | 1.84 |
| (9Z)-Octadecenoic acid | 577 | 595.1 | 596 | -19 | -3.29 |
| 1-Ethyl-2-propylpyridinium bis(trifluoromethanesulfonyl) amide | 593.9 | 595.4 | 596.3 | -2.4 | -0.4 |
| Tetrabutoxysilane | 580.2 | 595.8 | 599.7 | -19.5 | -3.36 |
| 1-Pentyl-3-methylimidazolium bis(trifluoromethanesulfonyl) amide | 595.6 | 596.9 | 596.7 | -1.1 | -0.18 |
| 1,1-Diphenyldodecane | 593.7 | 601.8 | 601.7 | -8 | -1.35 |
| Hexadecanedioic acid | 621.4 | 604.1 | 601.9 | 19.5 | 3.14 |
| N-Hexylpyridinium bis(trifluoromethanesulfonyl) amide | 612 | 611.7 | 611.7 | 0.3 | 0.05 |
| 1H,1H-Perfluoroundecan-1-ol | 602.4 | 613.1 | 615.8 | -13.4 | -2.22 |
| Dibutyl decanedioate | 619 | 615.8 | 614.9 | 4.1 | 0.66 |
| 1-Cyclohexylmethyl-3-methylimidazolium bis(trifluoromethanesulfonyl) amide | 617.1 | 617.5 | 618 | -0.9 | -0.15 |
| 1-Butyl-1-methylpiperidinium bis(trifluoromethylsulfonyl)amide | 607.5 | 617.6 | 617.9 | -10.4 | -1.71 |
| 1-Methyl-1-pentylpyrrolidinium bis(trifluoromethanesulfonyl) amide | 622.6 | 621.5 | 620.8 | 1.8 | 0.29 |
| 1-Pentyltetrahydrothiophenium bis(trifluoromethylsulfonyl) amide | 627 | 623.5 | 622.8 | 4.2 | 0.67 |
| 1-Butyl-3-methylimidazolium octylsulfate | 635 | 623.7 | 621.2 | 13.8 | 2.17 |
| 1,1,3,3-Tetraethyl-5,5-diphenylcylotrisiloxane | 629.6 | 624.8 | 618.9 | 10.7 | 1.7 |
| 1-Ethyl-2-butylpyridinium bis(trifluoromethanesulfonyl) amide | 623.6 | 625.5 | 625.7 | -2.1 | -0.34 |
| 1-Hexyl-3-methylimidazolium bis(trifluoromethanesulfonyl) amide | 629.2 | 626.9 | 626.7 | 2.5 | 0.4 |
| 1-Phenyl-1-cyclohexyldodecane | 611.1 | 628.1 | 627.9 | -16.8 | -2.75 |
| 1-Hexyl-3-methylpyridinium bis(trifluoromethylsulfonyl)amide | 624 | 638.3 | 639.8 | -15.8 | -2.53 |
| 1,1-Diphenyl-3,3,5,5,7,7-hexamethylcyclotetrasiloxane | 633 | 639.6 | 646.5 | -13.5 | -2.13 |
| 1-Hexyl-3-cyanopyridinium bis(trifluoromethylsulfonyl)amide | 658 | 650.1 | 650.4 | 7.6 | 1.16 |
| 1-Hexyl-4-cyanopyridinium bis(trifluoromethylsulfonyl)amide | 633 | 650.1 | 650.5 | -17.5 | -2.76 |
| N-Butyl-4-dimethylaminopyridinium bis(trifluoromethanesulfonyl) amide | 657.71 | 651.4 | 651.9 | 5.81 | 0.88 |
| 1-Hexyl-1-methylpyrrolidinium bis(trifluoromethanesulfonyl) amide | 655.1 | 651.6 | 650.1 | 5 | 0.76 |
| 1-Hexyltetrahydrothiophenium bis(trifluoromethylsulfonyl) amide | 646 | 653.5 | 654.7 | -8.7 | -1.35 |
| 1-Dodecyl-3-methylimidazolium hexafluorophosphate | 666.3 | 653.5 | 652.7 | 13.6 | 2.04 |
| 1-Ethyl-2-pentylpyridinium bis(trifluoromethanesulfonyl) amide | 652.7 | 655.5 | 655.8 | -3.1 | -0.47 |
| 1-Heptyl-3-methylimidazolium bis(trifluoromethanesulfonyl) amide | 659.2 | 657 | 657.8 | 1.4 | 0.21 |
| 1H,1H-Perfluorododecan-1-ol | 645.2 | 664 | 670 | -24.8 | -3.84 |
| Ricinelaidic acid | 646 | 668.7 | 669.7 | -23.7 | -3.67 |
| 1-Octylpyridinium bis(trifluoromethylsulfonyl)amide | 686 | 671.8 | 671.5 | 14.5 | 2.11 |
| Docosane | 698 | 675.1 | 674.3 | 23.7 | 3.4 |
| Pentapropylene glycol | 685.8 | 677.3 | 677.1 | 8.7 | 1.27 |
| 1-Methyl-1-heptylpyrrolidinium bis(trifluoromethanesulfonyl) amide | 685.1 | 681.6 | 679.7 | 5.4 | 0.79 |
| 1-Heptyltetrahydrothiophenium bis(trifluoromethylsulfonyl) amide | 685 | 683.6 | 683.6 | 1.4 | 0.2 |
| 1-Ethyl-2-hexylpyridinium bis(trifluoromethanesulfonyl) amide | 685.5 | 685.6 | 685.7 | -0.2 | -0.03 |
| 1-Octyl-3-methylimidazolium bis(trifluoromethanesulfonyl) amide | 690.2 | 687 | 685.7 | 4.5 | 0.65 |
| 3,7,11,15-Tetramethyl-1-hexadecyn-3-ol | 712.5 | 697.7 | 692.3 | 20.2 | 2.84 |
| 1-Octyl-3-cyanopyridinium bis(trifluoromethylsulfonyl)amide | 709 | 710.2 | 710.8 | -1.8 | -0.25 |
| 4-Dimethylamino-1-hexylpyridinium bis(trifluoromethanesulfonyl) amide | 731 | 711.5 | 708.4 | 22.6 | 3.09 |
| 1-Methyl-1-octylpyrrolidinium bis(trifluoromethanesulfonyl) amide | 716.3 | 711.7 | 713.6 | 2.7 | 0.38 |
| 1-Octyltetrahydrothiophenium bis(trifluoromethylsulfonyl) amide | 719 | 713.6 | 713.1 | 5.9 | 0.82 |
| 1-Ethyl-2-heptylpyridinium bis(trifluoromethanesulfonyl) amide | 717.5 | 715.6 | 715.3 | 2.2 | 0.31 |
| Heptylpentaoxyethylene | 722.9 | 717.5 | 716.8 | 6.1 | 0.84 |
| 1-(3,4,5,6-Perfluorohexyl)-3-methylimidazolium-3-methylimidazolium bis(trifluoromethanesulfonyl) amide | 725 | 719.3 | 717.2 | 7.8 | 1.08 |
| DEHP | 708.98 | 723 | 725.3 | -16.32 | -2.3 |
| Di-n-octyl phthalate | 707.1 | 726.9 | 727.5 | -20.4 | -2.89 |
| Bis(1-ethylhexyl) o-phthalate | 704.6 | 728.1 | 729.9 | -25.3 | -3.59 |
| Butyl 1-butylnicotinate bis(trifluoromethylsulfonyl)amide | 707 | 728.8 | 729.8 | -22.8 | -3.22 |
| Dihexyl sebacate | 710.9 | 736 | 737.3 | -26.4 | -3.71 |
| Glycerol tricaproate | 753.1 | 737 | 735.1 | 18 | 2.39 |
| N-Hexyl-3-methyl-4-dimethylaminopyridinium bis(trifluoromethanesulfonyl) amide | 725 | 738.1 | 741 | -16 | -2.21 |
| 1-Nonyltetrahydrothiophenium bis(trifluoromethylsulfonyl) amide | 741 | 743.7 | 744.2 | -3.2 | -0.43 |
| 1-Ethyl-2-octylpyridinium bis(trifluoromethanesulfonyl) amide | 749.4 | 745.7 | 745.2 | 4.2 | 0.56 |
| 1-Decyl-3-methylimidazolium bis(trifluoromethanesulfonyl) amide | 754.8 | 747.1 | 746.2 | 8.6 | 1.14 |
| Tri-n-octylamine | 750.8 | 763 | 760.2 | -9.4 | -1.25 |
| Pentacosane | 769 | 765.2 | 765.1 | 3.9 | 0.51 |
| 1-Methyl-1-decylpyrrolidinium bis(trifluoromethanesulfonyl) amide | 778.9 | 771.8 | 772.3 | 6.6 | 0.85 |
| 1-Decyltetrahydrothiophenium bis(trifluoromethylsulfonyl) amide | 780 | 773.7 | 774.1 | 5.9 | 0.76 |
| 1-Ethyl-2-nonylpyridinium bis(trifluoromethanesulfonyl) amide | 778.5 | 775.7 | 775.4 | 3.1 | 0.4 |
| 1-Methyl-3-menthyloxymethylimidazolium bis(trifluoromethylsulfonyl)imide | 781.4 | 786 | 788.7 | -7.3 | -0.93 |
| Hexapropylene glycol | 807.5 | 796.4 | 791.5 | 16 | 1.98 |
| 1-Ethyl-2-decylpyridinium bis(trifluoromethanesulfonyl) amide | 811.2 | 805.8 | 805.1 | 6.1 | 0.75 |
| 1-Dodecyl-3-methylimidazolium bis(trifluoromethanesulfonyl) amide | 820.2 | 807.2 | 807.3 | 12.9 | 1.57 |
| 1-Ethyl-3-menthyloxymethylimidazolium bis(trifluoromethylsulfonyl)imide | 818.4 | 813.4 | 814 | 4.4 | 0.54 |
| Bis(2-ethylhexyl) azelate | 799.7 | 822.3 | 822.6 | -22.9 | -2.86 |
| Heptacosane | 828.4 | 825.3 | 824.8 | 3.6 | 0.43 |
| 1-Propyl-3-menthyloxymethylimidazolium bis(trifluoromethylsulfonyl)imide | 839.4 | 843.4 | 844 | -4.6 | -0.55 |
| Bis(2-ethylhexyl) sebacate | 849.4 | 852.3 | 852.9 | -3.5 | -0.41 |
| 1-Butyl-3-menthyloxymethylimidazolium bis(trifluoromethylsulfonyl)imide | 866.2 | 873.5 | 874.8 | -8.6 | -0.99 |
| Vitamin E acetate | 897.9 | 888 | 884.7 | 13.2 | 1.47 |
| 1-Pentyl-3-menthyloxymethylimidazolium bis(trifluoromethylsulfonyl)imide | 905 | 903.5 | 903.3 | 1.7 | 0.19 |
| Dodecahydrosqualene | 886.36 | 903.9 | 904 | -17.64 | -1.99 |
| 1-Hexyl-3-menthyloxymethylimidazolium bis(trifluoromethylsulfonyl)imide | 944.6 | 933.6 | 932.5 | 12.1 | 1.28 |
| 11-Decylheneicosane | 949.8 | 943.6 | 942.4 | 7.4 | 0.78 |
| 1-Heptyl-3-menthyloxymethylimidazolium bis(trifluoromethylsulfonyl)imide | 960.5 | 963.6 | 963.3 | -2.8 | -0.29 |
| 1-Octyl-3-menthyloxymethylimidazolium bis(trifluoromethylsulfonyl)imide | 995 | 993.7 | 994.9 | 0.1 | 0.01 |
| 1-Nonyl-3-menthyloxymethylimidazolium bis(trifluoromethylsulfonyl)imide | 1023.6 | 1023.7 | 1023.4 | 0.2 | 0.02 |
| 1-Decyl-3-menthyloxymethylimidazolium bis(trifluoromethylsulfonyl)imide | 1045.9 | 1053.8 | 1054.4 | -8.5 | -0.81 |
| Tetraoctoxysilane | 1095.4 | 1076.6 | 1071.3 | 24.1 | 2.2 |
| 1-Undecyl-3-menthyloxymethylimidazolium bis(trifluoromethylsulfonyl)imide | 1088.3 | 1083.8 | 1083.5 | 4.8 | 0.44 |
| Glyceryl tricaprate | 1108.8 | 1097.6 | 1097.6 | 11.2 | 1.01 |
| 1-Dodecyl-3-menthyloxymethylimidazolium bis(trifluoromethylsulfonyl)imide | 1117.9 | 1113.9 | 1113.4 | 4.5 | 0.4 |
| Tetradecyl trihexylphosphonium bis(trifluoromethylsulfonyl)amide | 1298.8 | 1311.9 |  | -13.1 | -1.01 |
| Benzene hexa-n-hexanoate | 1300 | 1313.4 | 1325.3 | -25.3 | -1.95 |
| Benzene hexa-n-heptanoate | 1500 | 1493.7 | 1488.3 | 11.7 | 0.78 |
| TMPTO | 1849 | 1856.8 | 1857.5 | -8.5 | -0.46 |
