# Supplementary material for: Calculation of the Isobaric Heat Capacities of the Liquid and Solid Phase of Organic Compounds at 298.15K by Means of a Generally Applicable Computer Algorithm Based on the Group-Additivity Method
Source: Preprints.org preprint supplement (doi:10.20944/preprints202002.0076.v1), 2020-02-06
Supplement: Supplementary file 3 [file S04. Experimental vs. calculated Cp(sol,298) Data Table.doc]

| Molecules sorted by calc. values |  |  |  |  |  |
| --- | --- | --- | --- | --- | --- |
| Molecule name | Cp(sol,298) exp | Cp(sol,298) calc | Cp(sol,298) test | Deviation | Dev. in % |
| 1,2,4-Triazole | 78.7 | 70.8 | 63.7 | 15 | 19.06 |
| Imidazole | 83.93 | 86 | 85.9 | -1.97 | -2.35 |
| Urea | 93.8 | 86.7 | 85.3 | 8.5 | 9.06 |
| 1H-Pyrazole | 81 | 88.9 | 91.7 | -10.7 | -13.21 |
| Glycine | 99.3 | 89.9 | 87 | 12.3 | 12.39 |
| Acetamide | 86.65 | 90.1 | 90.5 | -3.85 | -4.44 |
| Methylammonium iodide | 93.93 | 92.9 |  | 1.03 | 1.1 |
| Pyrazine | 102.35 | 96.4 | 94.6 | 7.75 | 7.57 |
| Thiourea | 96.9 | 98 | 97.8 | -0.9 | -0.93 |
| Thioacetamide | 100.3 | 99.2 |  | 1.1 | 1.1 |
| Diformylhydrazine | 99.12 | 100.3 |  | -1.18 | -1.19 |
| Hydrazinecarboxamide | 110.6 | 101.9 |  | 8.7 | 7.87 |
| Propanone | 96.2 | 102.3 | 102.2 | -6 | -6.24 |
| Dicyanomethane | 110.29 | 104.7 | 103.3 | 6.99 | 6.34 |
| 1,3,5-Trioxane | 111.4 | 105.6 |  | 5.8 | 5.21 |
| Oxalamide | 110.86 | 105.6 | 104.7 | 6.16 | 5.56 |
| 1,3-Dioxolan-2-one | 117.12 | 106.9 |  | 10.22 | 8.73 |
| 2-Methylimidazole | 105.09 | 107.9 | 108.6 | -3.51 | -3.34 |
| Benzene | 97.9 | 107.9 | 107 | -9.1 | -9.3 |
| Acrylamide | 110.58 | 109.6 | 111.3 | -0.72 | -0.65 |
| 2,4-Imidazolidinedione | 117.09 | 109.9 | 108.6 | 8.49 | 7.25 |
| 3-Amino-5-methylisoxazole | 125.1 | 111.1 | 98.4 | 26.7 | 21.34 |
| Oxalic acid | 91 | 112.1 | 112.6 | -21.6 | -23.74 |
| Purine | 106.9 | 112.4 |  | -5.5 | -5.14 |
| Hydrazinecarbothioamide | 110.9 | 113.2 |  | -2.3 | -2.07 |
| Dimethylene urethane | 113.8 | 114.2 | 113.7 | 0.1 | 0.09 |
| beta-Alanine | 116.4 | 115.4 | 112.5 | 3.9 | 3.35 |
| Methylcarbamide | 114.74 | 115.7 | 115.9 | -1.16 | -1.01 |
| 1,3-Oxazolidine-2-thione | 117.1 | 115.8 |  | 1.3 | 1.11 |
| (L)-Alanine | 119.9 | 116.5 | 116.3 | 3.6 | 3 |
| Squaric acid | 121.8 | 116.8 | 114.1 | 7.7 | 6.32 |
| 2,5-Pyrrolidinedione | 123.88 | 118.7 | 117 | 6.88 | 5.55 |
| 2-Thioxo-4-imidazolidinone | 137.05 | 121.2 | 117.8 | 19.25 | 14.05 |
| Serine | 135.6 | 121.7 | 118 | 17.6 | 12.98 |
| Sarcosine | 118.2 | 122.5 |  | -4.3 | -3.64 |
| 1,4-Benzoquinone | 129 | 123 | 121.8 | 7.2 | 5.58 |
| Glycine anhydride | 134 | 123.5 | 122.7 | 11.3 | 8.43 |
| 1,3-Dithiane | 123.84 | 123.9 |  | -0.06 | -0.05 |
| Phenol | 127.44 | 123.9 | 124 | 3.44 | 2.7 |
| Uracil | 120.5 | 124.3 | 124.5 | -4 | -3.32 |
| Cytosine | 132.6 | 124.8 | 123.4 | 9.2 | 6.94 |
| 2-Mercapto-2-thiazoline | 125.3 | 125.3 |  | 0 | 0 |
| N-Methylmaleimide | 146.65 | 125.9 | 123.8 | 22.85 | 15.58 |
| Carbonothioic dihydrazide | 125.3 | 128.5 |  | -3.2 | -2.55 |
| Lactic acid | 127.6 | 128.8 | 129 | -1.4 | -1.1 |
| Nortricyclene | 129 | 130.8 | 131.1 | -2.1 | -1.63 |
| Hypoxanthine | 134.5 | 131 | 132.2 | 2.3 | 1.71 |
| Malonamide | 133.38 | 131.1 | 131.7 | 1.68 | 1.26 |
| Propylenecarbonate | 122.51 | 131.3 |  | -8.79 | -7.17 |
| 2-Aminopyridine | 142.47 | 132.4 | 125.6 | 16.87 | 11.84 |
| Methimazole | 129.8 | 132.8 | 130.6 | -0.8 | -0.62 |
| 2-Ethylimidazole | 147.08 | 133.4 | 130.1 | 16.98 | 11.54 |
| Imidodicarbonic diamide | 131.3 | 133.9 | 134.3 | -3 | -2.28 |
| 2-Pyrazinecarboxylic acid | 143.5 | 134 | 132.4 | 11.1 | 7.74 |
| 2,4-Hexadiyne | 133.57 | 134.1 |  | -0.53 | -0.4 |
| 2-Furoic acid | 132.26 | 135.4 |  | -3.14 | -2.37 |
| Tetrahydro-2H-1,3-oxazine-2-thione | 139.7 | 135.4 |  | 4.3 | 3.08 |
| Methacrylamide | 143.8 | 135.7 | 133.8 | 10 | 6.95 |
| 2-Methyl-2-propanol | 146.11 | 136 | 133 | 13.11 | 8.97 |
| Barbituric acid | 141.1 | 136.2 | 135.6 | 5.5 | 3.9 |
| 4-Fluorophenol | 144.6 | 137 | 136.6 | 8 | 5.53 |
| 5-Methylhydantoin | 143.11 | 137.2 | 136.4 | 6.71 | 4.69 |
| Proline | 150.4 | 137.3 | 132.3 | 18.1 | 12.03 |
| Cyanuric acid | 133.5 | 137.8 | 139.1 | -5.6 | -4.19 |
| Malonic acid | 127.63 | 138.8 | 138.8 | -11.17 | -8.75 |
| 1,3-Dibromopropane | 156.1 | 139.1 |  | 17 | 10.89 |
| Isobutyramide | 148.1 | 139.2 | 140.2 | 7.9 | 5.33 |
| 1,2-Dihydroxybenzene | 144.3 | 139.9 | 139.4 | 4.9 | 3.4 |
| 1,4-Dihydroxybenzene | 136.4 | 139.9 | 141.3 | -4.9 | -3.59 |
| 1,3-Dihydroxybenzene | 135.53 | 139.9 | 141.3 | -5.77 | -4.26 |
| 4-Chlorophenol | 161.06 | 140.3 | 140.2 | 20.86 | 12.95 |
| 1,4-Dichlorobenzene | 147.76 | 140.6 | 140.6 | 7.16 | 4.85 |
| Benzimidazole | 128.8 | 140.7 | 143.3 | -14.5 | -11.26 |
| 1H-Indazole | 128.8 | 140.7 | 144 | -15.2 | -11.8 |
| 1,3,5,7-Tetroxane | 142.22 | 140.8 |  | 1.42 | 1 |
| 4-Aminobutyric acid | 146.4 | 140.8 | 138 | 8.4 | 5.74 |
| 3-Thiophenecarboxylic acid | 134.17 | 141.1 | 141.1 | -6.93 | -5.17 |
| 2-Acetylpyrrole | 132.05 | 141.3 | 144.8 | -12.75 | -9.66 |
| 2-Aminobutyric acid | 146.4 | 142 | 142.1 | 4.3 | 2.94 |
| 6-Aminopurine | 147 | 142.7 |  | 4.3 | 2.93 |
| Vitamin B3 | 151.3 | 143.5 | 142.6 | 8.7 | 5.75 |
| 2-Acetylfuran | 140.94 | 144.3 |  | -3.36 | -2.38 |
| Norbornene | 129.9 | 144.6 | 144.3 | -14.4 | -11.09 |
| N,N'-Dimethylurea | 133.3 | 144.8 | 150.7 | -17.4 | -13.05 |
| 2-Thiophenecarboxylic acid | 153.78 | 145.1 | 143.5 | 10.28 | 6.68 |
| cis-3-Chloro-2-butenoic acid | 140.2 | 145.4 |  | -5.2 | -3.71 |
| trans-3-Chloro-2-butenoic acid | 159.8 | 145.4 |  | 14.4 | 9.01 |
| Fumaric acid | 141.8 | 145.9 | 146.2 | -4.4 | -3.1 |
| Maleic acid | 135.6 | 145.9 | 145.6 | -10 | -7.37 |
| N-Methylsuccinimide | 150.45 | 146 | 146.1 | 4.35 | 2.89 |
| 4-Chloroaniline | 151.2 | 146 | 146 | 5.2 | 3.44 |
| Nicotinic acid | 151.3 | 146.7 | 146.2 | 5.1 | 3.37 |
| 1,4-Dibromobenzene | 145.7 | 146.8 | 147.1 | -1.4 | -0.96 |
| Diethanolamine | 137 | 147.4 |  | -10.4 | -7.59 |
| Thiobarbituric acid | 137.2 | 147.5 | 149 | -11.8 | -8.6 |
| Ethylene oxalate | 141.9 | 147.9 | 147.9 | -6 | -4.23 |
| Thianaphthene | 163.01 | 148.9 | 148.8 | 14.21 | 8.72 |
| Xanthine | 151.34 | 149 | 149.3 | 2.04 | 1.35 |
| Benzamide | 153.8 | 149.2 | 149.8 | 4 | 2.6 |
| 1,4-Dioxane-2,5-dione | 133.28 | 149.3 | 149.5 | -16.22 | -12.17 |
| p-Cresol | 150.2 | 149.7 | 150.1 | 0.1 | 0.07 |
| o-Cresol | 154.56 | 149.7 | 149.9 | 4.66 | 3.02 |
| N,N-Dimethylurea | 134.3 | 150.3 | 144.4 | -10.1 | -7.52 |
| 5-Methyluracil | 150.2 | 150.4 | 151 | -0.8 | -0.53 |
| Bicyclo[2.2.2]oct-2-ene | 156.73 | 150.9 | 150.4 | 6.33 | 4.04 |
| 1,2-Diaminobenzene | 150.82 | 151.4 | 151.7 | -0.88 | -0.58 |
| 1,3-Diaminobenzene | 153.7 | 151.4 | 147.3 | 6.4 | 4.16 |
| Threonine | 155.31 | 152 | 151.9 | 3.41 | 2.2 |
| Hexamethylenetetramine | 152.29 | 152.2 |  | 0.09 | 0.06 |
| Benzoic acid | 147.07 | 152.5 | 152.9 | -5.83 | -3.96 |
| Glycylglycine | 163.97 | 153.1 | 154.2 | 9.77 | 5.96 |
| N-Acetylglycinamide | 152.7 | 153.3 | 151.8 | 0.9 | 0.59 |
| Isoquinoline | 177.68 | 154.1 | 152.7 | 24.98 | 14.06 |
| 1,4-Cyclohexanedione | 161.5 | 154.5 | 153.9 | 7.6 | 4.71 |
| 4-Hydroxybenzaldehyde | 149.9 | 155.5 | 156.3 | -6.4 | -4.27 |
| p-Toluidine | 165.2 | 155.5 | 154 | 11.2 | 6.78 |
| Succindiamide | 158.17 | 156.5 | 155.7 | 2.47 | 1.56 |
| 2-Pyridinealdoxime | 151.93 | 156.5 |  | -4.57 | -3.01 |
| Butylene carbonate | 139.34 | 156.7 |  | -17.36 | -12.46 |
| 1,3,5-Trichlorobenzene | 158.35 | 157 | 163.4 | -5.05 | -3.19 |
| 1,3-Dithiane sulfone | 157.6 | 157.7 |  | -0.1 | -0.06 |
| Guanine | 160.7 | 157.9 |  | 2.8 | 1.74 |
| epsilon-Caprolactam | 156.78 | 158 | 156.8 | -0.02 | -0.01 |
| 2-Benzimidazolethiol | 171.23 | 158.1 | 153.2 | 18.03 | 10.53 |
| 2,2-Dimethyl-1,3-propanediol | 183.18 | 158.1 | 155.4 | 27.78 | 15.17 |
| Benzenecarbothioamide | 152.8 | 158.3 |  | -5.5 | -3.6 |
| Asparagine | 159.8 | 158.7 | 158.3 | 1.5 | 0.94 |
| 1,3-Benzoxazole-2-thione | 153.1 | 158.7 |  | -5.6 | -3.66 |
| Naphthalene | 168.2 | 159.8 | 159.4 | 8.8 | 5.23 |
| 5-Methylisoxazole-3-carboxylic acid | 146.2 | 159.8 | 163.1 | -16.9 | -11.56 |
| 2-Aminobenzothiazole | 153.2 | 160.3 | 164 | -10.8 | -7.05 |
| Isopropylcarbamide | 170.3 | 161.7 | 162.7 | 7.6 | 4.46 |
| 3-Acetyl-2-oxazolidinone | 164.7 | 161.8 | 160.5 | 4.2 | 2.55 |
| Aspartic acid | 155.18 | 161.9 | 160.2 | -5.02 | -3.23 |
| Pivalamide | 159.8 | 162.1 | 162.5 | -2.7 | -1.69 |
| Methyl methacrylate | 165.3 | 162.5 | 159.2 | 6.1 | 3.69 |
| Butanedioic acid | 152.93 | 163 | 163.9 | -10.97 | -7.17 |
| Bicyclo[2.2.2]octane | 157.69 | 163.8 | 164.6 | -6.91 | -4.38 |
| Norbornane | 151 | 163.8 | 165.1 | -14.1 | -9.34 |
| Phthalonitrile | 161.3 | 164.2 | 163.6 | -2.3 | -1.43 |
| Erythritol | 161.9 | 164.2 | 165.6 | -3.7 | -2.29 |
| 1,4-Benzenedicarbonitrile | 161.2 | 164.2 | 166.9 | -5.7 | -3.54 |
| 1-Azabicyclo[2.2.2]octane | 169.37 | 164.3 | 163.7 | 5.67 | 3.35 |
| DABCO | 153.18 | 164.9 | 158.9 | -5.72 | -3.73 |
| 4-Nitrophenol | 143.9 | 165.1 | 165.9 | -22 | -15.29 |
| Trimethylacetic acid | 177.8 | 165.3 | 165.2 | 12.6 | 7.09 |
| 3-Chloronitrobenzene | 168.2 | 165.4 | 166.2 | 2 | 1.19 |
| 4-Chloronitrobenzene | 169.9 | 165.4 | 164.2 | 5.7 | 3.35 |
| Valine | 165 | 165.6 | 165.1 | -0.1 | -0.06 |
| Phthalic anhydride | 160 | 165.6 | 167.2 | -7.2 | -4.5 |
| 2,5-Dihydroxytoluene | 174.9 | 165.7 | 166.5 | 8.4 | 4.8 |
| Benzenesulfonamide | 172.91 | 165.9 | 164.6 | 8.31 | 4.81 |
| 5-Aminovaleric acid | 163.7 | 166.3 | 166.5 | -2.8 | -1.71 |
| 1,3,5-Tribromobenzene | 161.7 | 166.3 | 167.6 | -5.9 | -3.65 |
| 1,3-Benzothiazole-2-thione | 157.3 | 166.3 |  | -9 | -5.72 |
| 3-Thiopheneacetic acid | 167.76 | 166.5 | 169.2 | -1.44 | -0.86 |
| 2-Amino-2-methyl-1,3-propanediol | 161 | 166.6 | 168.7 | -7.7 | -4.78 |
| Uric acid | 166.1 | 167 | 164.2 | 1.9 | 1.14 |
| 2-Methylindole | 176.09 | 167.6 | 166.6 | 9.49 | 5.39 |
| Benzimidazole-2-thione | 171.23 | 167.8 | 168.3 | 2.93 | 1.71 |
| trans-1,2-Cyclohexanediol | 163.2 | 168 | 166.4 | -3.2 | -1.96 |
| cis-1,2-Cyclohexanediol | 160.4 | 168 | 170.5 | -10.1 | -6.3 |
| 3-Carboxyphenol | 157.3 | 168.5 | 168.5 | -11.2 | -7.12 |
| 4-Carboxyphenol | 155.2 | 168.5 | 168.9 | -13.7 | -8.83 |
| 4-Chlorobenzoic acid | 167.8 | 168.8 | 168.3 | -0.5 | -0.3 |
| 3-Chlorobenzoic acid | 163.6 | 168.8 | 171.5 | -7.9 | -4.83 |
| 2-Chlorobenzoic acid | 163.2 | 168.8 | 171.5 | -8.3 | -5.09 |
| Salicylic acid | 160.9 | 169.7 | 169.8 | -8.9 | -5.53 |
| FOX-7 | 176.59 | 170.1 | 173.6 | 2.99 | 1.69 |
| 1-Benzopyran-4-one | 176.8 | 170.3 |  | 6.5 | 3.68 |
| 2-Thiopheneacetic acid | 159.23 | 170.6 | 173.4 | -14.17 | -8.9 |
| Acenaphthylene | 183.59 | 170.7 | 171.4 | 12.19 | 6.64 |
| 3-Nitroaniline | 158.84 | 170.8 | 170.6 | -11.76 | -7.4 |
| 4-Nitroaniline | 154.2 | 170.8 | 172.8 | -18.6 | -12.06 |
| 3,4-Dihydroxybenzaldehyde | 205.9 | 171.5 | 171.2 | 34.7 | 16.85 |
| 2-Bromobenzoic acid | 154 | 171.9 | 171 | -17 | -11.04 |
| 3-Bromobenzoic acid | 151.4 | 171.9 | 172.3 | -20.9 | -13.8 |
| 4-Bromobenzoic acid | 151.4 | 171.9 | 173.1 | -21.7 | -14.33 |
| 2-Nitroaniline | 166 | 172 | 172.2 | -6.2 | -3.73 |
| 2,4-Dichlorobenzaldehyde | 186.5 | 172.2 | 170.1 | 16.4 | 8.79 |
| 1,2,4,5-Tetrachlorobenzene | 202.5 | 173.3 | 171.2 | 31.3 | 15.46 |
| 2-Amino-5-nitropyridine | 158 | 173.6 | 183.1 | -25.1 | -15.89 |
| p-Anthranilic acid | 177.8 | 174.2 | 175.5 | 2.3 | 1.29 |
| TRIS | 171.27 | 174.2 | 174.9 | -3.63 | -2.12 |
| m-Anthranilic acid | 162.8 | 174.2 | 175.5 | -12.7 | -7.8 |
| Pentaerythritol | 188.4 | 174.4 | 170.6 | 17.8 | 9.45 |
| 4-Nitrotoluene | 172.3 | 174.9 | 175.6 | -3.3 | -1.92 |
| 4-Ethylphenol | 206.9 | 175.2 | 174.7 | 32.2 | 15.56 |
| o-Anthranilic acid | 165.3 | 175.4 | 175.7 | -10.4 | -6.29 |
| 8-Quinolinol | 180.42 | 175.5 | 175.3 | 5.12 | 2.84 |
| 2-Naphthol | 172.8 | 175.9 | 176 | -3.2 | -1.85 |
| 1-Naphthol | 166.9 | 175.9 | 176 | -9.1 | -5.45 |
| 1,3,5,7,9-Pentoxecane | 171.5 | 176.1 |  | -4.6 | -2.68 |
| N-Methylphthalimide | 185.33 | 177 | 175.2 | 10.13 | 5.47 |
| 2,6-Pyridinedicarboxylic acid | 166.31 | 177.3 | 181.1 | -14.79 | -8.89 |
| 2-Methylbenzoic acid | 174.9 | 178.3 | 178.2 | -3.3 | -1.89 |
| 4-Methylbenzoic acid | 169 | 178.3 | 178.4 | -9.4 | -5.56 |
| 3-Methylbenzoic acid | 163.6 | 178.3 | 177.9 | -14.3 | -8.74 |
| 1,3-Dimethyluracil | 170 | 178.7 | 181.6 | -11.6 | -6.82 |
| Acetanilide | 179.3 | 179 | 179 | 0.3 | 0.17 |
| Alanylglycine | 168 | 179.7 | 181.3 | -13.3 | -7.92 |
| 5-Amino-2-mercaptobenzimidazole | 172 | 179.8 | 183.7 | -11.7 | -6.8 |
| Benzoylformic acid | 192.9 | 180.2 | 179.6 | 13.3 | 6.89 |
| N-Acetyl-L-alanine amide | 181.3 | 180.6 | 182.1 | -0.8 | -0.44 |
| 4,4'-Bipyridine | 185.6 | 181.3 | 185.7 | -0.1 | -0.05 |
| exo-Dicyclopentadiene | 188.7 | 181.8 | 178.2 | 10.5 | 5.56 |
| Glutaramide | 170.21 | 182 | 183 | -12.79 | -7.51 |
| N,N'-Diethylurea | 219 | 182 | 177.3 | 41.7 | 19.04 |
| Enantholactam | 205 | 182.1 | 180.8 | 24.2 | 11.8 |
| 3-Phenylpropiolic acid | 180 | 182.2 |  | -2.2 | -1.22 |
| 2-(Acetylamino)-N-methylethanamide | 177.75 | 182.3 | 181 | -3.25 | -1.83 |
| 2,4,6-Tribromophenol | 172 | 182.3 | 185.8 | -13.8 | -8.02 |
| Glutamine | 184.18 | 182.9 | 182.9 | 1.28 | 0.69 |
| Adamantane | 190 | 183.2 | 183.7 | 6.3 | 3.32 |
| Benzofuran-2-carboxylic acid | 184.8 | 184 | 185.5 | -0.7 | -0.38 |
| Indole-2-carboxylic acid | 178.4 | 184.2 | 186.3 | -7.9 | -4.43 |
| Hexachloroethane | 198.24 | 184.5 |  | 13.74 | 6.93 |
| n-Butylurea | 207.9 | 185.3 | 185.2 | 22.7 | 10.92 |
| 2-Methylnaphthalene | 195.8 | 185.7 | 185.1 | 10.7 | 5.46 |
| 3,5-Dimethylisoxazole-4-carboxylic acid | 177.8 | 185.9 | 186.7 | -8.9 | -5.01 |
| 2-Amino-4-methylbenzothiazole | 182.3 | 186.1 | 187.9 | -5.6 | -3.07 |
| 2-Amino-6-methylbenzothiazole | 197.08 | 186.1 | 180.8 | 16.28 | 8.26 |
| trans-Cinnamic acid | 197.5 | 186.2 | 186.1 | 11.4 | 5.77 |
| Glutamic acid | 175.06 | 186.2 | 187.2 | -12.14 | -6.93 |
| 4-Amino-3-furazanecarboxamidoxime | 180.4 | 186.4 |  | -6 | -3.33 |
| 2-Methylbutanedioic acid | 199.6 | 186.7 | 187.6 | 12 | 6.01 |
| N-Isobutylacetamide | 190 | 186.9 | 186.7 | 3.3 | 1.74 |
| sec-Butylurea | 207.9 | 187.1 | 182.3 | 25.6 | 12.31 |
| 4-Dimethylaminopyridine | 181.32 | 187.5 | 187.1 | -5.78 | -3.19 |
| N,N-Diethylurea | 183.3 | 187.6 | 186.5 | -3.2 | -1.75 |
| 4-Aminobenzenesulfonamide | 199.75 | 187.7 | 183.6 | 16.15 | 8.09 |
| 2-Aminobenzenesulfonamide | 173.92 | 187.7 | 192.1 | -18.18 | -10.45 |
| Mandelic acid | 199.2 | 187.9 | 187.1 | 12.1 | 6.07 |
| Hexamethyleneglycol | 190 | 188 | 189.5 | 0.5 | 0.26 |
| t-Butylcarbamide | 185.5 | 188 | 187.8 | -2.3 | -1.24 |
| 2,4,6-Tribromoaniline | 181.4 | 188.1 | 184.1 | -2.7 | -1.49 |
| Pentanedioic acid | 186.9 | 188.5 | 188.4 | -1.5 | -0.8 |
| 2-(Dinitromethylene)-1,3-diazacyclopentane | 205.41 | 188.5 | 184.6 | 20.81 | 10.13 |
| Cyclohexanone oxime | 199.38 | 188.8 |  | 10.58 | 5.31 |
| Tartaric acid | 184.5 | 189 | 190.1 | -5.6 | -3.04 |
| 1-Norbornyl cyanide | 172.9 | 189 | 191.1 | -18.2 | -10.53 |
| Pentafluorophenol | 201.3 | 189.4 | 186.2 | 15.1 | 7.5 |
| 3,4,5,6-Tetrahydrophthalic anhydride | 193.39 | 189.7 | 189.8 | 3.59 | 1.86 |
| endo-2-Cyanonorbornane | 193.93 | 189.8 | 189.7 | 4.23 | 2.18 |
| exo-Bicyclo[2.2.1]heptane-2-carbonitrile | 200 | 189.8 | 185.2 | 14.8 | 7.4 |
| 1,4-Dinitrobenzene | 192 | 190.2 | 190.8 | 1.2 | 0.62 |
| 1,3-Dinitrobenzene | 188.3 | 190.2 | 190.2 | -1.9 | -1.01 |
| 1,2-Dinitrobenzene | 195 | 190.2 | 190.4 | 4.6 | 2.36 |
| Acenaphthene | 191.38 | 190.8 | 191.1 | 0.28 | 0.15 |
| 4-Nitrophthalimide | 199.62 | 191 | 190 | 9.62 | 4.82 |
| 1-Benzylimidazole | 182.1 | 191 | 195.5 | -13.4 | -7.36 |
| 3-Nitrophthalimide | 222.29 | 191 | 189.4 | 32.89 | 14.8 |
| Isoleucine | 188.28 | 191.1 | 189.6 | -1.32 | -0.7 |
| N-Methylpivalamide | 183 | 191.1 | 191 | -8 | -4.37 |
| Leucine | 200.8 | 191.1 | 191.5 | 9.3 | 4.63 |
| Ethriol | 213.8 | 191.1 | 190.6 | 23.2 | 10.85 |
| t-Butylacetamide | 190 | 191.3 | 193.2 | -3.2 | -1.68 |
| 2,5-Dibromobenzoic acid | 223 | 191.4 | 189.1 | 33.9 | 15.2 |
| 3,5-Dibromobenzoic acid | 223.1 | 191.4 | 188.5 | 34.6 | 15.51 |
| 2-Methylbenzenesulfonamide | 193.48 | 191.7 | 194.9 | -1.42 | -0.73 |
| epsilon-Aminocaproic acid | 175.7 | 191.7 | 192.8 | -17.1 | -9.73 |
| 4-Methylbenzenesulfonamide | 205.46 | 191.7 | 187.3 | 18.16 | 8.84 |
| Arabinose | 184.1 | 192 | 193 | -8.9 | -4.83 |
| Methyl 3-hydroxybenzoate | 205 | 192 | 192.1 | 12.9 | 6.29 |
| 4-Methoxybenzoic acid | 207.5 | 192 | 191.8 | 15.7 | 7.57 |
| Xylose | 180.4 | 192 | 196.3 | -15.9 | -8.81 |
| Methyl 4-hydroxybenzoate | 214.41 | 192 | 191.7 | 22.71 | 10.59 |
| Biphenyl | 198.4 | 192.8 | 193.5 | 4.9 | 2.47 |
| 2-Acetylbenzofuran | 192.1 | 193 | 194.1 | -2 | -1.04 |
| Dimethyl fumarate | 199.2 | 193 | 193.7 | 5.5 | 2.76 |
| 2-Adamantanol | 207.2 | 193.2 | 192.5 | 14.7 | 7.09 |
| 1,4-Phenylene diisocyanate | 211.7 | 193.2 |  | 18.5 | 8.74 |
| Dibenzofuran | 199.01 | 193.5 | 194.9 | 4.11 | 2.07 |
| 4-Nitrobenzoic acid | 180.3 | 193.6 | 194.1 | -13.8 | -7.65 |
| 3-Nitrobenzoic acid | 179.9 | 193.6 | 194 | -14.1 | -7.84 |
| Thiophenedicarboxylic acid | 204.87 | 194.1 | 177.5 | 27.37 | 13.36 |
| Ornithine | 191.2 | 194.3 | 197.1 | -5.9 | -3.09 |
| 2-Nitrobenzoic acid | 191.6 | 194.8 | 194.8 | -3.2 | -1.67 |
| 2-Hydroxyacetanilide | 182.4 | 195 | 195.8 | -13.4 | -7.35 |
| 4-Hydroxy-3-methoxybenzaldehyde | 187.6 | 195.1 | 195.5 | -7.9 | -4.21 |
| D-Ribose | 185.97 | 195.1 | 197 | -11.03 | -5.93 |
| 1-Adamantanol | 196.7 | 195.6 | 195.7 | 1 | 0.51 |
| Carbazole | 194 | 195.6 | 195.3 | -1.3 | -0.67 |
| Chloranil | 193.8 | 196.1 |  | -2.3 | -1.19 |
| Methyl N-phenylurethane | 203.3 | 196.1 | 195.4 | 7.9 | 3.89 |
| N-Phenylglycine | 177.4 | 196.1 | 199.3 | -21.9 | -12.34 |
| 1,3,5-Trichlorotrifluorobenzene | 197 | 196.3 | 196.2 | 0.8 | 0.41 |
| 2-Methyl-4-nitroaniline | 217.1 | 196.6 | 196.6 | 20.5 | 9.44 |
| 2-Ethyl-4-pyridinecarbothioamide | 201.3 | 196.9 |  | 4.4 | 2.19 |
| Terephthalic acid | 199.6 | 197.1 | 196.7 | 2.9 | 1.45 |
| Isophthalic acid | 201.7 | 197.1 | 197.1 | 4.6 | 2.28 |
| Phthalic acid | 188.11 | 197.1 | 197.3 | -9.19 | -4.89 |
| 2-Mercapto-5-methoxybenzimidazole | 195.4 | 197.6 | 197.1 | -1.7 | -0.87 |
| Fluorene | 203.13 | 197.6 | 197.7 | 5.43 | 2.67 |
| Methyl 4-aminobenzoate | 200 | 197.8 | 197.2 | 2.8 | 1.4 |
| 4-Methyl-2-nitroaniline | 205.4 | 197.8 | 197.6 | 7.8 | 3.8 |
| Thionaphthene-2-carboxylic acid | 179 | 197.8 | 202.6 | -23.6 | -13.18 |
| 1,6-Anhydro-beta-D-glucopyranose | 187.2 | 198 | 197.3 | -10.1 | -5.4 |
| Lactide | 184.3 | 198.2 | 199.6 | -15.3 | -8.3 |
| cis-Cyclohexane-1,2-dicarboxylic anhydride | 207.4 | 200 | 200.5 | 6.9 | 3.33 |
| endo-5-Norbornene-2,3-dicarboxylic anhydride | 183.3 | 200.2 | 205.8 | -22.5 | -12.27 |
| Gallic acid | 199.55 | 200.5 | 200.9 | -1.35 | -0.68 |
| trans-Decahydroquinoline | 193.79 | 200.5 |  | -6.71 | -3.46 |
| 2-Chloro-6-(trichloromethyl)pyridine | 189.35 | 200.9 |  | -11.55 | -6.1 |
| Phenylalanine | 203.1 | 201.1 | 200.9 | 2.2 | 1.08 |
| Mesitol | 189.6 | 201.4 | 201.6 | -12 | -6.33 |
| Dibenzo[b,d]thiophene | 223.73 | 201.6 | 210.5 | 13.23 | 5.91 |
| Methyl 4-methylbenzoate | 199.1 | 201.8 | 203.3 | -4.2 | -2.11 |
| Tyramine | 213.75 | 202.1 | 194.5 | 19.25 | 9.01 |
| trans-4-Coumaric acid | 193 | 202.3 | 201.8 | -8.8 | -4.56 |
| Arabitol | 201.35 | 203.3 | 205.1 | -3.75 | -1.86 |
| 3-Chloromandelic acid | 211.1 | 204.3 | 203.5 | 7.6 | 3.6 |
| N-(2-Cyanoethyl)aniline | 174.6 | 205.1 | 209.4 | -34.8 | -19.93 |
| Pentachlorophenol | 201.96 | 205.7 | 206 | -4.04 | -2 |
| beta-Alanyl-beta-alanine | 196 | 205.9 | 206.7 | -10.7 | -5.46 |
| Hexachlorobenzene | 201.29 | 206 | 205.5 | -4.21 | -2.09 |
| 3-Nitrophthalic anhydride | 224.02 | 206.8 | 203.4 | 20.62 | 9.2 |
| 4-Nitrophthalic anhydride | 175.74 | 206.8 | 207.6 | -31.86 | -18.13 |
| Xylitol | 207 | 206.9 | 202.7 | 4.3 | 2.08 |
| Alanylalanine | 194.9 | 207 | 207.2 | -12.3 | -6.31 |
| 3-Nitrobenzenesulfonamide | 199.97 | 207.1 | 211.6 | -11.63 | -5.82 |
| 4-Nitrobenzenesulfonamide | 219.98 | 207.1 | 205.4 | 14.58 | 6.63 |
| (L)-Methionine | 205.16 | 207.4 |  | -2.24 | -1.09 |
| N-Acetyl-L-prolinamide | 208.9 | 207.5 | 205.1 | 3.8 | 1.82 |
| Adipamide | 203.5 | 207.5 | 207.3 | -3.8 | -1.87 |
| 2-Chloro-5-(trichloromethyl)pyridine | 192 | 207.8 |  | -15.8 | -8.23 |
| Theophylline | 196.8 | 207.8 | 212.7 | -15.9 | -8.08 |
| 3-Aminocinnamic acid | 227.6 | 208 | 207.3 | 20.3 | 8.92 |
| 2-Nitrobenzenesulfonamide | 179.54 | 208.3 | 212.3 | -32.76 | -18.25 |
| 1-Cyanoadamantane | 218.6 | 208.4 | 207.7 | 10.9 | 4.99 |
| 2-Hydroxybiphenyl | 227.61 | 208.9 | 209 | 18.61 | 8.18 |
| 2-Chlorobiphenyl | 211.92 | 209.2 | 208.8 | 3.12 | 1.47 |
| 4-Chlorobiphenyl | 243.76 | 209.2 | 208.8 | 34.96 | 14.34 |
| 2-(Acetylamino)-N-methylpropanamide | 201.3 | 209.6 | 211.8 | -10.5 | -5.22 |
| Trimellitic anhydride | 248.9 | 210.2 | 207.6 | 41.3 | 16.59 |
| 2-Deoxy-d-glucose | 200.2 | 210.4 | 210.5 | -10.3 | -5.14 |
| 2-(Dinitromethylene)-1,3-diazacyclohexane | 207.76 | 210.6 | 211.1 | -3.34 | -1.61 |
| 1,10-Phenanthroline | 198.74 | 211.1 | 215 | -16.26 | -8.18 |
| 1,2,4,5-Tetramethylbenzene | 215.1 | 211.2 | 209 | 6.1 | 2.84 |
| Benzo[h]quinoline | 206.36 | 211.4 | 212.4 | -6.04 | -2.93 |
| Phenanthridine | 201.87 | 211.4 | 211.5 | -9.63 | -4.77 |
| Guajen | 216.47 | 211.5 | 211.4 | 5.07 | 2.34 |
| 2,7-Dimethylnaphthalene | 204.39 | 211.5 | 211.4 | -7.01 | -3.43 |
| 2,6-Dimethylnaphthalene | 204.2 | 211.5 | 211.7 | -7.5 | -3.67 |
| 1,8-Dimethylnaphthalene | 242.8 | 211.5 | 210.9 | 31.9 | 13.14 |
| Anthracene | 210.5 | 211.8 | 212 | -1.5 | -0.71 |
| Phenanthrene | 220.3 | 211.8 | 213.2 | 7.1 | 3.22 |
| DAAF | 215.53 | 212.5 |  | 3.03 | 1.41 |
| Dibenzo-p-dioxin | 206.7 | 212.6 | 213.6 | -6.9 | -3.34 |
| 4-Methoxycinnamaldehyde | 217.4 | 212.8 | 211.8 | 5.6 | 2.58 |
| 4-Methyl-4-cyclohexene-1,2-dicarboxylic anhydride | 203.51 | 213.1 | 212.3 | -8.79 | -4.32 |
| (1,1-Dimethylethyl)urea | 185.5 | 213.4 | 216.7 | -31.2 | -16.82 |
| 3-Cyano-4-methoxymethyl-6-methyl-(2-pyridone) | 211.76 | 213.5 | 214.5 | -2.74 | -1.29 |
| 2,4,6-Trimethylbenzonitrile | 220.5 | 213.5 | 213 | 7.5 | 3.4 |
| 1,6-Hexanedioic acid | 196.6 | 213.9 | 214 | -17.4 | -8.85 |
| Diphenyl ether | 216.56 | 214.2 | 214.9 | 1.66 | 0.77 |
| 2-Phenylaniline | 221.86 | 214.6 | 214.8 | 7.06 | 3.18 |
| DNTA hydrate | 213.13 | 215.4 | 214.2 | -1.07 | -0.5 |
| Hippuric acid | 217 | 215.6 | 215.6 | 1.4 | 0.65 |
| 4-Methyl-2-(dinitromethylene)-1,3-diazacyclopentane | 218.89 | 215.9 | 220 | -1.11 | -0.51 |
| Dibenzo[b,e]pyridine | 205.07 | 216.8 | 219.3 | -14.23 | -6.94 |
| Tyrosine | 216.44 | 217.1 | 217.3 | -0.86 | -0.4 |
| Trimethylhydroquinone | 217.6 | 217.4 | 216.9 | 0.7 | 0.32 |
| Diphenylmethane | 233.5 | 218.3 | 217.8 | 15.7 | 6.72 |
| Caffeic acid | 181.96 | 218.3 | 221 | -39.04 | -21.46 |
| 3,4-Dimethoxybenzaldehyde | 213.5 | 218.6 | 220.9 | -7.4 | -3.47 |
| 4-Phenyltoluene | 238.74 | 218.7 | 218 | 20.74 | 8.69 |
| Xanthone | 226 | 219 | 219.9 | 6.1 | 2.7 |
| 4,4'-Difluorobiphenyl | 222.77 | 219.1 | 218.6 | 4.17 | 1.87 |
| 9,10-Dihydrophenanthrene | 243.8 | 219.4 | 218.7 | 25.1 | 10.3 |
| N-Propylpiperidine | 202.3 | 219.5 | 220.5 | -18.2 | -9 |
| 4,5-Dihydroxy-2-(dinitromethylene)imidazolidine | 217.76 | 219.8 | 221.5 | -3.74 | -1.72 |
| 4-Nitroacetanilide | 230.5 | 220.1 | 219.4 | 11.1 | 4.82 |
| 1,2,4,5-Benzenetetracarbonitrile | 222.3 | 220.5 | 217.9 | 4.4 | 1.98 |
| Benzophenone | 224.8 | 220.5 | 220.4 | 4.4 | 1.96 |
| 9,10-Dihydroanthracene | 219.06 | 220.8 | 220.7 | -1.64 | -0.75 |
| 1-Adamantylcarboxamide | 220.5 | 221.6 | 222.9 | -2.4 | -1.09 |
| 2-Phenylbenzimidazole | 208.09 | 221.8 | 223 | -14.91 | -7.17 |
| Fluoranthene | 230.25 | 221.9 | 220.8 | 9.45 | 4.1 |
| Phenazine | 234.3 | 221.9 | 205.8 | 28.5 | 12.16 |
| Diamantane | 223.4 | 222.1 | 224.7 | -1.3 | -0.58 |
| 4-Nitrophenetole | 246 | 222.4 | 221.7 | 24.3 | 9.88 |
| Tolane | 225.9 | 222.6 |  | 3.3 | 1.46 |
| 5-Methyl-5-phenylhydantoin | 235.85 | 222.6 | 222.6 | 13.25 | 5.62 |
| N-Methylcarbazole | 217.84 | 222.8 | 224.8 | -6.96 | -3.2 |
| D-Tagatose | 228 | 223 | 223 | 5 | 2.19 |
| beta-D-Fructose | 227.7 | 223 | 222.4 | 5.3 | 2.33 |
| Phenoxathiin | 213.77 | 223 | 231.8 | -18.03 | -8.43 |
| Pyromellitic dianhydride | 219.9 | 223.4 | 226.8 | -6.9 | -3.14 |
| Inositol | 218 | 223.6 | 223 | -5 | -2.29 |
| D-Mannose | 223.22 | 224 | 226.8 | -3.58 | -1.6 |
| alpha-D-Glucose | 219.19 | 224 | 224.2 | -5.01 | -2.29 |
| D-Galactose | 213.7 | 224 | 226.3 | -12.6 | -5.9 |
| D-Psicose | 221.3 | 224.2 | 222.5 | -1.2 | -0.54 |
| Diphenyl sulfide | 239.7 | 224.5 | 224 | 15.7 | 6.55 |
| Pentaerythritol tetrabromide | 218.57 | 224.7 |  | -6.13 | -2.8 |
| 4,4'-Dihydroxybiphenyl | 224.31 | 224.9 | 224.4 | -0.09 | -0.04 |
| 4-Dimethylaminobenzaldehyde | 234 | 224.9 | 216.8 | 17.2 | 7.35 |
| 9,10-Anthraquinone | 226.6 | 225.3 | 226.3 | 0.3 | 0.13 |
| Ethyl 4-hydroxybenzoate | 233.93 | 225.8 | 225.9 | 8.03 | 3.43 |
| Ethyl 3-hydroxybenzoate | 217.22 | 225.8 | 225.3 | -8.08 | -3.72 |
| N-Benzyl-beta-alanine | 221.7 | 225.9 | 227 | -5.3 | -2.39 |
| 1,4-Anthraquinone | 223.34 | 226.1 | 227.3 | -3.96 | -1.77 |
| trans-Stilbene | 235 | 226.6 | 226.5 | 8.5 | 3.62 |
| N-Benzylalanine | 222.4 | 227 | 228.7 | -6.3 | -2.83 |
| Cyclohexylbenzene | 263.17 | 227.1 | 227.3 | 35.87 | 13.63 |
| Citrulline | 232.6 | 227.2 | 226.1 | 6.5 | 2.79 |
| 2,3,5,6-Tetramethyl-1,4-benzoquinone | 231.54 | 227.4 | 222.3 | 9.24 | 3.99 |
| 4-Nitrocinnamic acid | 238.1 | 227.4 | 226.7 | 11.4 | 4.79 |
| 3-Nitrocinnamic acid | 240.2 | 227.4 | 228.2 | 12 | 5 |
| 2-Nitrocinnamic acid | 240.6 | 227.4 | 227.6 | 13 | 5.4 |
| Pyrene | 229.7 | 227.8 | 227.9 | 1.8 | 0.78 |
| 1,3-Diethylbarbituric acid | 248.5 | 227.9 | 223.4 | 25.1 | 10.1 |
| Diphenylmethanol | 236.8 | 228.3 | 226.6 | 10.2 | 4.31 |
| Ethyl vanillin | 212.2 | 228.8 | 229.6 | -17.4 | -8.2 |
| N-Acetyl valinamide | 232.1 | 229.7 | 229.6 | 2.5 | 1.08 |
| Ethyl N-phenylcarbamate | 227.2 | 229.9 | 230.4 | -3.2 | -1.41 |
| Camphene | 235.13 | 231.1 | 228.1 | 7.03 | 2.99 |
| 1,3,5-Trinitrobenzene | 222.7 | 231.4 | 232.3 | -9.6 | -4.31 |
| Ethyl 4-aminobenzoate | 236.4 | 231.5 | 231.7 | 4.7 | 1.99 |
| 2-Chloro-N,N-dimethylnicotinamide | 259.4 | 232 |  | 27.4 | 10.56 |
| Pimelamide | 230.82 | 232.9 | 233.9 | -3.08 | -1.33 |
| Caffeine | 232 | 232.9 | 239.6 | -7.6 | -3.28 |
| trans-Azobenzene | 229 | 233.1 |  | -4.1 | -1.79 |
| Dopa | 260.6 | 233.1 | 232.5 | 28.1 | 10.78 |
| Thianthrene | 224.97 | 233.3 | 250.7 | -25.73 | -11.44 |
| Barbital | 228.7 | 233.6 | 235.5 | -6.8 | -2.97 |
| 1-Acetyladamantane | 217.5 | 233.8 | 235.3 | -17.8 | -8.18 |
| 1,2,3-Trichloro-4,5,6-trimethylbenzene | 252.34 | 234.5 | 234.5 | 17.84 | 7.07 |
| Tetrahydroanthracene | 247.02 | 234.6 | 234.9 | 12.12 | 4.91 |
| 2-(Dinitromethylene)-1,3-diazacycloheptane | 215.4 | 234.7 | 239 | -23.6 | -10.96 |
| 3,4-Dihydroxyhydrocinnamic acid | 218.62 | 235.4 | 235.5 | -16.88 | -7.72 |
| Camphor | 242.7 | 236 | 236 | 6.7 | 2.76 |
| Bicyclo[3.3.3]undecane | 213.2 | 236 | 236.3 | -23.1 | -10.83 |
| Pentamethylbenzene | 210.5 | 237 | 237.4 | -26.9 | -12.78 |
| Tryptophane | 238.15 | 237.2 | 238.3 | -0.15 | -0.06 |
| 4-Methylphenanthrene | 262.8 | 237.6 | 237.7 | 25.1 | 9.55 |
| 4-Nitrophthalic acid | 232.24 | 238.2 | 239 | -6.76 | -2.91 |
| 3-Nitrophthalic acid | 247.02 | 238.2 | 237.8 | 9.22 | 3.73 |
| 1,8-Octanediol | 236.36 | 238.9 | 237.1 | -0.74 | -0.31 |
| 1,3-Diethyl-2-thiobarbituric acid | 236.9 | 239.2 | 240.8 | -3.9 | -1.65 |
| Heptanedioic acid | 240.7 | 239.4 | 240 | 0.7 | 0.29 |
| 3,4-Dimethoxyphenylacetonitrile | 243.5 | 240.6 | 244 | -0.5 | -0.21 |
| 9-Ethyl-9H-carbazole | 238.2 | 241.4 | 241.4 | -3.2 | -1.34 |
| 2,4,6-Trimethylphenyl isocyanide | 241.8 | 241.8 |  | 0 | 0 |
| 1,2,3,4-Tetrahydro-N-methylcarbazole | 241.35 | 241.8 | 242.5 | -1.15 | -0.48 |
| Ferulic acid | 235.94 | 241.8 | 240.8 | -4.86 | -2.06 |
| 1,8-Dinitronaphthalene | 254.4 | 242.2 | 240.7 | 13.7 | 5.39 |
| 1,5-Dinitronaphthalene | 259.4 | 242.2 | 241.1 | 18.3 | 7.05 |
| Sorbitol | 239 | 242.3 | 243.7 | -4.7 | -1.97 |
| 8-Aminocaprylic acid | 251.7 | 242.7 | 243.7 | 8 | 3.18 |
| Alanylglycylglycine | 236 | 242.8 | 243.6 | -7.6 | -3.22 |
| 1-Methoxy-a-D-glucopyranoside | 233.7 | 242.8 | 243.2 | -9.5 | -4.07 |
| Isoborneol | 261.06 | 243.2 | 239.9 | 21.16 | 8.11 |
| Borneol | 261.06 | 243.2 | 236.9 | 24.16 | 9.25 |
| 9-Hydroxy-1,4-anthraquinone | 237.67 | 243.3 | 242.6 | -4.93 | -2.07 |
| 3-Fluoro-5-(3-pyridinyloxy)-benzenamine | 216.03 | 243.3 | 247.3 | -31.27 | -14.47 |
| 1,2-Diphenylethane | 253.76 | 243.8 | 243 | 10.76 | 4.24 |
| Dimethylterephthalate | 261.1 | 244.2 | 242.1 | 19 | 7.28 |
| Citric acid | 226.4 | 244.4 | 249 | -22.6 | -9.98 |
| 4,4'-Dimethylbiphenyl | 242.26 | 244.5 | 244.3 | -2.04 | -0.84 |
| N-Butylpiperidine | 242.97 | 244.9 | 243.9 | -0.93 | -0.38 |
| 2-Benzylbenzimidazole | 228.92 | 245 | 248.2 | -19.28 | -8.42 |
| Naphthalene-1,5-diisocyanate | 223.4 | 245.2 |  | -21.8 | -9.76 |
| Glyceryl-2-benzoate | 236.4 | 245.7 | 247.1 | -10.7 | -4.53 |
| Dulcose | 238.5 | 246 | 246.6 | -8.1 | -3.4 |
| 4,5,9,10-Tetrahydropyrene | 257.12 | 246 | 244.1 | 13.02 | 5.06 |
| Diphenylcarbonate | 263.13 | 247.2 |  | 15.93 | 6.05 |
| Benzil | 245.7 | 248.3 | 248.5 | -2.8 | -1.14 |
| Diphenyldisulfide | 241.7 | 248.3 |  | -6.6 | -2.73 |
| 1-Methoxycarbonyladamantane | 264.2 | 248.4 | 249.6 | 14.6 | 5.53 |
| 2,4,6-Trinitrophenol | 239.7 | 248.6 | 248.5 | -8.8 | -3.67 |
| 2,9-Dimethyl-1,10-phenanthroline | 253 | 248.8 | 250 | 3 | 1.19 |
| 2,6-Naphthalenedicarboxylic acid | 230.3 | 249 | 248.7 | -18.4 | -7.99 |
| Diphenylsulfone | 244.3 | 250.1 | 251.8 | -7.5 | -3.07 |
| Bisphenol F | 246.3 | 250.3 | 250.9 | -4.6 | -1.87 |
| Menthol | 250.1 | 250.8 | 251.9 | -1.8 | -0.72 |
| 1-Benzoylglycerol | 238.9 | 252.8 | 254 | -15.1 | -6.32 |
| Pentamethylchlorobenzene | 244.8 | 253.4 | 254 | -9.2 | -3.76 |
| 5-Cyano-5H-dibenzo[a,d]cycloheptene | 259.8 | 255.1 | 254.7 | 5.1 | 1.96 |
| 1,4-Bis-(2-hydroxyethyl)piperazine | 250.68 | 255.2 | 254.3 | -3.62 | -1.44 |
| N-Acetyl-D-leucine amide | 259.6 | 255.2 | 251.5 | 8.1 | 3.12 |
| Propyl phenylcarbamate | 263.6 | 255.3 | 254 | 9.6 | 3.64 |
| Monuron | 256 | 255.5 | 253.6 | 2.4 | 0.94 |
| 2,3,4,5-Tetramethylbenzoic acid | 249.5 | 255.8 | 256.6 | -7.1 | -2.85 |
| 2,3,5,6-Tetramethylbenzoic acid | 231.7 | 255.8 | 255.4 | -23.7 | -10.23 |
| Alanylvaline | 240 | 256.1 | 258 | -18 | -7.5 |
| Propyl 4-aminobenzoate | 292.46 | 257 | 256 | 36.46 | 12.47 |
| TNT | 243.3 | 257.2 | 259.4 | -16.1 | -6.62 |
| 1-Benzylpyrazole | 259.61 | 257.3 |  | 2.31 | 0.89 |
| 1,2,3,4,5,6,7,8-Octahydroanthracene | 277.96 | 257.3 | 254.8 | 23.16 | 8.33 |
| Bis(4-aminophenyl) ether | 278.2 | 257.7 | 258.1 | 20.1 | 7.23 |
| Suberamide | 245.33 | 258.4 | 260.4 | -15.07 | -6.14 |
| 3-Dimethylaminomethylindole | 283.7 | 258.6 | 243.4 | 40.3 | 14.21 |
| N-Acetylnorvaline-N'-methylamide | 239.69 | 260.5 | 260.7 | -21.01 | -8.77 |
| 1,2,3,6,7,8-Hexahydropyrene | 255.54 | 261.2 | 260.7 | -5.16 | -2.02 |
| 4,4-Methylenedianiline | 270.9 | 261.8 | 257.4 | 13.5 | 4.98 |
| Hexamethylbenzene | 245.6 | 262.9 | 263.7 | -18.1 | -7.37 |
| 3-Hydroxyflavone | 270.1 | 263.1 | 259.3 | 10.8 | 4 |
| Tetracene | 260.5 | 263.8 | 265.1 | -4.6 | -1.77 |
| 9,10-Benzophenanthrene | 259.2 | 263.8 | 265.1 | -5.9 | -2.28 |
| Benz[a]anthracene | 273.6 | 263.8 | 263.8 | 9.8 | 3.58 |
| 1,9-Nonanediol | 256.74 | 264.3 | 265.9 | -9.16 | -3.57 |
| Octanedioic acid | 267.6 | 264.9 | 264.5 | 3.1 | 1.16 |
| 9-Methoxy-1,4-anthraquinone | 269.21 | 265.7 | 264.9 | 4.31 | 1.6 |
| 7-Hydroxyflavone | 253.1 | 265.9 | 266.9 | -13.8 | -5.45 |
| 6-Hydroxyflavone | 250.3 | 265.9 | 266.8 | -16.5 | -6.59 |
| 4'-Bromomethyl-2-cyanobiphenyl | 257 | 266.4 |  | -9.4 | -3.66 |
| 5-Hydroxyflavone | 279.8 | 267.2 | 266.5 | 13.3 | 4.75 |
| [2,2]Metacyclophane | 240.6 | 269 | 268.9 | -28.3 | -11.76 |
| 6-Aminoflavone | 277.9 | 271.7 | 269.7 | 8.2 | 2.95 |
| Benzo[k]fluoranthene | 273.9 | 273.8 | 273.6 | 0.3 | 0.11 |
| Benzo[b]fluoranthene | 279.4 | 273.8 | 274.6 | 4.8 | 1.72 |
| p-Methacryloyloxybenzoic acid | 257.9 | 273.8 | 277.8 | -19.9 | -7.72 |
| Bisphenol E | 276.41 | 274 | 275.5 | 0.91 | 0.33 |
| Antipyrine | 268.2 | 274 |  | -5.8 | -2.16 |
| anti-trans-Truxane | 275.3 | 274.1 | 280.8 | -5.5 | -2 |
| N-Acetyl-D-glucosamine | 276.9 | 275.4 | 278.4 | -1.5 | -0.54 |
| 1-(4-Formylphenyl)naphthalene | 278.3 | 276.4 | 276.5 | 1.8 | 0.65 |
| [2,2]Metaparacyclophane | 261.5 | 277.7 | 278.3 | -16.8 | -6.42 |
| [2.2]Paracyclophane | 252.7 | 277.7 | 277.8 | -25.1 | -9.93 |
| m-Terphenyl | 281 | 277.8 | 278.9 | 2.1 | 0.75 |
| p-Terphenyl | 279.6 | 277.8 | 277.4 | 2.2 | 0.79 |
| o-Terphenyl | 274.75 | 277.8 | 278 | -3.25 | -1.18 |
| Benzoylglycylglycine | 277.4 | 278.8 | 279.8 | -2.4 | -0.87 |
| Arabinosylhypoxanthine | 283.3 | 279.3 | 279.3 | 4 | 1.41 |
| Perhydrophenanthrene | 289.5 | 279.5 | 279.3 | 10.2 | 3.52 |
| Perylene | 274.9 | 279.8 | 280.2 | -5.3 | -1.93 |
| Pentamethylbenzoic acid | 249.9 | 281.6 | 282.3 | -32.4 | -12.97 |
| 5,5-Diphenylhydantoin | 287.59 | 281.8 | 283.7 | 3.89 | 1.35 |
| trans-1,2-Dibenzoylethylene | 275.3 | 282 | 284.9 | -9.6 | -3.49 |
| Bisphenol S | 280.3 | 282.1 | 282.2 | -1.9 | -0.68 |
| Butyl 4-aminobenzoate | 308 | 282.4 | 282.4 | 25.6 | 8.31 |
| 4,4'-Dichlorodiphenyl sulphone | 269.3 | 282.8 | 291.1 | -21.8 | -8.1 |
| Alanylnorleucine | 276 | 283.4 | 280.7 | -4.7 | -1.7 |
| Azelamide | 270.3 | 283.8 | 284.2 | -13.9 | -5.14 |
| 1-(4-Methoxyphenyl)naphthalene | 282.5 | 284.4 | 285.5 | -3 | -1.06 |
| N-Benzoyl-N-methylbenzamide | 287.14 | 284.9 | 283.4 | 3.74 | 1.3 |
| N-Methylephedrine | 298.89 | 285.3 | 271.1 | 27.79 | 9.3 |
| Octyl urea | 278.7 | 287.1 | 287.3 | -8.6 | -3.09 |
| Vidarabine | 290.1 | 288.8 |  | 1.3 | 0.45 |
| 1,3-Di-t-butyl urea | 295.6 | 289.2 | 283.9 | 11.7 | 3.96 |
| Indeno[1,2,3-cd]pyrene | 297.9 | 289.8 | 289.1 | 8.8 | 2.95 |
| 1,10-Decanediol | 279.26 | 289.8 | 290.5 | -11.24 | -4.02 |
| cis-5a,6,11a,12-Tetrahdro[1,4]benzoxazino[3,2-b]-[1,4]-benzoxazine | 290.71 | 290.2 | 286.6 | 4.11 | 1.41 |
| Nonanedioic acid | 294.5 | 290.3 | 290.2 | 4.3 | 1.46 |
| 4-t-Butylbiphenyl | 304.73 | 290.6 | 290.1 | 14.63 | 4.8 |
| 4-Aminoantipyrine | 294.6 | 291 |  | 3.6 | 1.22 |
| Triptycene | 283.1 | 291.7 | 292.2 | -9.1 | -3.21 |
| 4,4'-Diaminodiphenyldisulfide | 294 | 291.8 |  | 2.2 | 0.75 |
| 2-(6-Methoxynaphthalen-2-yl)propanoic acid | 296.3 | 293.1 | 293.2 | 3.1 | 1.05 |
| 4,4'-Diaminodiphenyl sulfone | 314.9 | 293.6 | 286.8 | 28.1 | 8.92 |
| 3,3'-Dihydroxy-4,4'-diaminodiphenylmethane | 281.2 | 293.9 | 296.8 | -15.6 | -5.55 |
| Dibenzo[a,e]cyclooctene-5,11-dicarbonitrile | 299.8 | 294.3 | 290.6 | 9.2 | 3.07 |
| Dimethyl-2,6-naphthalinedicarboxylate | 283.8 | 296.1 | 295.2 | -11.4 | -4.02 |
| Bisphenol A | 301.34 | 296.8 | 298.7 | 2.64 | 0.88 |
| Tetramethylthiuram disulfide | 301.7 | 297.2 |  | 4.5 | 1.49 |
| 4'-Propylbiphenyl-4-carbonitrile | 302.97 | 297.7 | 297.4 | 5.57 | 1.84 |
| Triphenylamine | 297.5 | 299.2 | 299.4 | -1.9 | -0.64 |
| 1,2-Dibenzoylethane | 291.2 | 299.2 | 301.6 | -10.4 | -3.57 |
| 1,2-Diphenylbenzimidazole | 318.7 | 300.3 | 296.4 | 22.3 | 7 |
| Tritane | 308.8 | 301.1 | 300 | 8.8 | 2.85 |
| 3,3',4,4'-Tetraaminodiphenyl ether | 319.7 | 301.2 | 291.1 | 28.6 | 8.95 |
| Ibuprofen | 328.01 | 302 | 301.2 | 26.81 | 8.17 |
| 1-Benzyl-3-methylimidazolium chloride | 302.4 | 302.4 |  | 0 | 0 |
| 2-(4-Nitrobenzoylhydrazone)-propionic acid | 315.93 | 302.9 | 294 | 21.93 | 6.94 |
| 2,2'-Diindanyl | 332.6 | 302.9 | 300.1 | 32.5 | 9.77 |
| 1,4-Di-t-butylbenzene | 323.15 | 303.4 | 302.3 | 20.85 | 6.45 |
| 4,4'-Diisocyanatodiphenylmethane | 307 | 303.6 |  | 3.4 | 1.11 |
| Pentyl 4-aminobenzoate | 308.7 | 307.9 | 307.9 | 0.8 | 0.26 |
| Tetracyclopropylsuccinonitrile | 321.8 | 308.1 | 309 | 12.8 | 3.98 |
| Sebacamide | 289.66 | 309.3 | 309.7 | -20.04 | -6.92 |
| PMC | 315.3 | 309.9 | 309.4 | 5.9 | 1.87 |
| 4-(Phenylmethoxy)benzeneacetic acid | 340 | 310.4 | 309.9 | 30.1 | 8.85 |
| Ellagic acid | 328.85 | 310.9 | 305.1 | 23.75 | 7.22 |
| Coronene | 317.17 | 311.8 | 313.6 | 3.57 | 1.13 |
| Triphenylethylene | 309.2 | 311.9 | 312 | -2.8 | -0.91 |
| 4-t-Butyldiphenyl ether | 304.06 | 312 | 312 | -7.94 | -2.61 |
| t-Butyl 1-phenylethylcarbamate | 313.81 | 312.4 | 307.8 | 6.01 | 1.92 |
| 1-Methyl-7-isopropylphenanthrene | 294.6 | 312.6 | 313.4 | -18.8 | -6.38 |
| Triphenylmethanol | 318.8 | 313.4 | 312.9 | 5.9 | 1.85 |
| 3,4,4'-Trichlorocarbanilide | 284.13 | 313.5 | 323 | -38.87 | -13.68 |
| Isoproturon | 293.28 | 314.1 | 318.2 | -24.92 | -8.5 |
| 1,11-Undecanediol | 297.79 | 315.2 | 315.7 | -17.91 | -6.01 |
| Pentacene | 311.5 | 315.7 | 316.1 | -4.6 | -1.48 |
| Decanedioic acid | 321.4 | 315.8 | 315.7 | 5.7 | 1.77 |
| 1-(3-Formyl-4-methoxyphenyl)naphthalene | 313.8 | 316 | 318.2 | -4.4 | -1.4 |
| [3,3]Paracyclophane | 324.3 | 317.1 | 315.8 | 8.5 | 2.62 |
| 1,2'-Dinaphthylmethane | 314.6 | 322.2 | 322.4 | -7.8 | -2.48 |
| 1-(3,4-Dimethoxyphenyl)naphthalene | 321.6 | 323.9 | 327.4 | -5.8 | -1.8 |
| 1,1,1-Triphenylethane | 316.7 | 323.9 | 323.2 | -6.5 | -2.05 |
| Perfluorobiphenyl | 317.4 | 323.9 | 334.7 | -17.3 | -5.45 |
| 1,1,2-Triphenylethane | 319.7 | 326.5 | 326.5 | -6.8 | -2.13 |
| Trolox | 332 | 328.7 | 325.2 | 6.8 | 2.05 |
| 1,8-Diphenylnaphthalene | 328.3 | 329.8 | 329.1 | -0.8 | -0.24 |
| 1-(Biphenyl-4-yl)naphthalene | 328.3 | 329.8 | 329.8 | -1.5 | -0.46 |
| 1,4-Diphenylnaphthalene | 324 | 329.8 | 329.2 | -5.2 | -1.6 |
| Hexyl phenylcarbamate | 336.8 | 331.7 | 330.2 | 6.6 | 1.96 |
| 3-Phenyl-5-phenoxymethyl-2-oxazolidinone | 310.6 | 332.4 | 333.7 | -23.1 | -7.44 |
| Hexyl 4-aminobenzoate | 342.2 | 333.4 | 333.1 | 9.1 | 2.66 |
| Undecanediamide | 314.53 | 334.8 | 335.3 | -20.77 | -6.6 |
| Dicumyl | 321.1 | 336.7 | 338.3 | -17.2 | -5.36 |
| Tri-t-butylmethane | 354.8 | 339.5 | 338.9 | 15.9 | 4.48 |
| 1,12-Dodecanediol | 330.23 | 340.7 | 340.2 | -9.97 | -3.02 |
| Undecanedioic acid | 348.3 | 341.2 | 341.5 | 6.8 | 1.95 |
| 2,4,6-Triphenylpyridine | 358.6 | 343 | 340.8 | 17.8 | 4.96 |
| N-Benzoyl-o-aminodiphenylamine | 356.6 | 348.7 | 353 | 3.6 | 1.01 |
| Tri-t-butylmethanol | 350.6 | 351.9 | 350.1 | 0.5 | 0.14 |
| 4-Nitro-4'-t-butyl-diphenylether | 359.52 | 353.1 | 353 | 6.52 | 1.81 |
| Bisphenol AP | 365.85 | 356 | 356.5 | 9.35 | 2.56 |
| Perchlorobiphenyl | 344 | 356.4 | 375.8 | -31.8 | -9.24 |
| 1-Tridecanol | 378 | 358.6 | 357 | 21 | 5.56 |
| Dodecanediamide | 327.84 | 360.2 | 362.3 | -34.46 | -10.51 |
| p-Quaterphenyl | 363.5 | 362.8 | 363.2 | 0.3 | 0.08 |
| 1,3,5-Triphenylbenzene | 361 | 362.8 | 363.7 | -2.7 | -0.75 |
| o-Quaterphenyl | 359.1 | 362.8 | 362.6 | -3.5 | -0.97 |
| m-Quaterphenyl | 359.5 | 362.8 | 363.2 | -3.7 | -1.03 |
| 1,2,3-Triphenylbenzene | 352.37 | 362.8 | 361.9 | -9.53 | -2.7 |
| 3,5-Di-t-butylsalicylic acid | 383 | 365.3 | 362.3 | 20.7 | 5.4 |
| 1,13-Tridecanediol | 366.88 | 366.2 | 365.5 | 1.38 | 0.38 |
| Dodecanedioic acid | 375.2 | 366.7 | 366.2 | 9 | 2.4 |
| N-(3-Fluoro-5-(3-pyridinyloxy)phenyl)-N'-3-pyridinylurea | 362.32 | 372.4 | 375.8 | -13.48 | -3.72 |
| Tridecanoic acid | 387.6 | 373.4 | 373 | 14.6 | 3.77 |
| 1,1'-Diphenyl-1,1'-bicyclopentyl | 375.5 | 377.3 | 377.6 | -2.1 | -0.56 |
| Tetraphenylmethane | 368.2 | 383 | 385.4 | -17.2 | -4.67 |
| Tetraisopropoxysilane | 359.48 | 383 | 389.6 | -30.12 | -8.38 |
| Myristyl alcohol | 388 | 384.1 | 384 | 4 | 1.03 |
| Tetrapropoxysilane | 363.39 | 387.1 | 395.7 | -32.31 | -8.89 |
| 4,4'-Di-t-butylbiphenyl | 412.41 | 388.4 | 387.5 | 24.91 | 6.04 |
| 1,14-Tetradecanediol | 379.61 | 391.6 | 390.3 | -10.69 | -2.82 |
| 1,13-Tridecanedioic acid | 402.1 | 392.2 | 390.6 | 11.5 | 2.86 |
| 1,8-Di(4-formylphenyl)naphthalene | 393.5 | 393 | 393.2 | 0.3 | 0.08 |
| Indapamide | 396.31 | 394 |  | 2.31 | 0.58 |
| Tetraphenylsilane | 395.8 | 395.7 |  | 0.1 | 0.03 |
| Tetraphenylethylene | 388.7 | 397.1 | 399 | -10.3 | -2.65 |
| 1-Monocaprin | 410 | 397.4 | 395.6 | 14.4 | 3.51 |
| Tetradecanoic acid | 432.01 | 398.9 | 397.2 | 34.81 | 8.06 |
| 2-Pentadecanone | 426.8 | 407.8 | 408.5 | 18.3 | 4.29 |
| 1,1,1,2-Tetraphenylethane | 395.4 | 408.5 | 410.9 | -15.5 | -3.92 |
| 1,8-Di(4-methoxyphenyl)naphthalene | 399.2 | 408.9 | 409.7 | -10.5 | -2.63 |
| 1,1,2,2-Tetraphenylethane | 399.6 | 409.3 | 410.6 | -11 | -2.75 |
| 1-Pentadecanol | 400 | 409.5 | 408.9 | -8.9 | -2.23 |
| Nonyl 4-aminobenzoate | 422.6 | 409.7 | 409.3 | 13.3 | 3.15 |
| 4-Hexyloxybenzylideneaniline | 404.52 | 411 | 412.1 | -7.58 | -1.87 |
| Tetradecanediamide | 383.31 | 411.1 | 410.6 | -27.29 | -7.12 |
| N-(4-Ethoxybenzylidene)-4-butylaniline | 429.09 | 411.4 | 410 | 19.09 | 4.45 |
| Lactose | 412.5 | 414.9 | 416.8 | -4.3 | -1.04 |
| 1,15-Pentadecanediol | 377.45 | 417.1 | 418.7 | -41.25 | -10.93 |
| Maltose | 434.7 | 417.4 | 413.7 | 21 | 4.83 |
| Cellobiose | 436.1 | 417.4 | 410 | 26.1 | 5.98 |
| 1,14-Tetradecanedioic acid | 429 | 417.6 | 418 | 11 | 2.56 |
| Saccharose | 424.3 | 418.2 | 410.7 | 13.6 | 3.21 |
| 4-Hexyloxybenzylideneamino-4'-fluorobenzene | 442.55 | 424.1 | 422.1 | 20.45 | 4.62 |
| 1-Pentadecanoic acid | 443.28 | 424.3 | 423.4 | 19.88 | 4.48 |
| 1,1'-Diphenyl-1,1'-bicyclohexyl | 403.8 | 425.4 | 426.2 | -22.4 | -5.55 |
| 4-Hexyloxybenzylideneamino-4'-chlorobenzene | 434.94 | 427.3 | 426.3 | 8.64 | 1.99 |
| Cetane | 441.8 | 431 | 430.7 | 11.1 | 2.51 |
| 1-Hexadecanol | 422 | 435 | 434.3 | -12.3 | -2.91 |
| 4-Hexyloxybenzylidene-4'-toluidine | 441.4 | 436.8 | 436.7 | 4.7 | 1.06 |
| N-(4-Hexyloxybenzylidene)-4-aminobenzonitrile | 432.51 | 439.1 | 440.6 | -8.09 | -1.87 |
| cis-(5,12)-7,7,14,14-Hexamethyl-1,4,8,11-tetraazacyclotetradecane | 444.8 | 440.5 |  | 4.3 | 0.97 |
| Glyceryl-2-laurate | 436.4 | 441.2 | 442 | -5.6 | -1.28 |
| 1,16-Hexadecanediol | 426.18 | 442.5 | 443.5 | -17.32 | -4.06 |
| Vitamin B2 | 442.2 | 445.8 | 448.3 | -6.1 | -1.38 |
| N,N'-Bis-(m-methoxyphenyl)terephtalamide | 458.1 | 447.4 | 446.4 | 11.7 | 2.55 |
| N,N'-Bis(p-methoxyphenyl)terephthalamide | 467.8 | 447.4 | 446.1 | 21.7 | 4.64 |
| m-Quinquephenyl | 443.7 | 447.7 | 446.5 | -2.8 | -0.63 |
| o-Quinquephenyl | 444.3 | 447.7 | 448.7 | -4.4 | -0.99 |
| p-Quinquephenyl | 455.5 | 447.7 | 446.8 | 8.7 | 1.91 |
| 1-Glyceryl laurate | 447.7 | 448.3 | 448.7 | -1 | -0.22 |
| Palmitic acid | 460.7 | 449.8 | 449.2 | 11.5 | 2.5 |
| Dibenzo-18-crown-6 | 439.7 | 460.9 | 464.8 | -25.1 | -5.71 |
| Hexadecanedioic acid | 482.8 | 468.5 | 468 | 14.8 | 3.07 |
| p-Diacetylbenzene diethyl ketal | 462 | 468.5 | 478.4 | -16.4 | -3.55 |
| Methylprednisolone | 472.1 | 469.5 | 465 | 7.1 | 1.5 |
| 1,8-Di(3-formyl-4-methoxyphenyl)naphthalene | 458.2 | 472.1 | 475.9 | -17.7 | -3.86 |
| Methyl hexadecanoate | 474.47 | 473.3 | 471.8 | 2.67 | 0.56 |
| Margaric acid | 475.7 | 475.2 | 475.5 | 0.2 | 0.04 |
| 2,4,6-Trimethyl-2,4,6-triphenylcyclotrisiloxane | 506.7 | 477.7 |  | 29 | 5.72 |
| Tetra-2-methyl-1-propoxysilane | 477.59 | 481.7 | 480.6 | -3.01 | -0.63 |
| Octadecane | 485.64 | 481.9 | 481.7 | 3.94 | 0.81 |
| Bis-(o-aminophenyl)-2,2'-dibenzimidazole oxide | 471.1 | 483.6 | 487.3 | -16.2 | -3.44 |
| Tetra-2-butoxysilane | 487.27 | 484.8 | 482.9 | 4.37 | 0.9 |
| N-(4-Pentyloxybenzylidene)-4-butylaniline | 478.2 | 487.7 | 488.8 | -10.6 | -2.22 |
| 1,8-Di(3,4-dimethoxyphenyl)naphthalene | 470.1 | 488 | 495 | -24.9 | -5.3 |
| Di(4'-methoxyphenyl)cyclohexane-1,4-dicarboxylate | 478.6 | 488.9 | 490.4 | -11.8 | -2.47 |
| Tetrabutoxysilane | 493.68 | 489 | 486.9 | 6.78 | 1.37 |
| 1,4-Bis(diphenylamino)benzene | 470.6 | 490.6 | 503.2 | -32.6 | -6.93 |
| Pentaphenylethane | 473.6 | 491.3 | 492.5 | -18.9 | -3.99 |
| 2-Monomyristin | 506.3 | 492.1 | 491.6 | 14.7 | 2.9 |
| Risperidal | 502 | 494.3 | 487.4 | 14.6 | 2.91 |
| 1,2,3,4-Tetraphenylnaphthalene | 491.6 | 499.7 | 500.4 | -8.8 | -1.79 |
| 1,8-Bis(biphenyl-4-yl)naphthalene | 490.9 | 499.7 | 500.6 | -9.7 | -1.98 |
| Stearic acid | 501.6 | 500.7 | 501.3 | 0.3 | 0.06 |
| 4-Nitrophenyl-4'-octyloxybenzoate | 510 | 510 | 510.7 | -0.7 | -0.14 |
| N-(4-Hexyloxybenzylidene)-4-butylaniline | 512.02 | 513.2 | 514.6 | -2.58 | -0.5 |
| 1-Nonadecanoic acid | 525.4 | 526.2 | 525.5 | -0.1 | -0.02 |
| 4,4'-Bis-(N-carbazolyl) -1,1'-biphenyl | 539.36 | 529.7 | 524.6 | 14.76 | 2.74 |
| 2,3-Dimethyl-2,3-bis(4-t-butylphenyl)butane | 529.5 | 532.3 | 532.8 | -3.3 | -0.62 |
| 2-Monopalmitin | 558.6 | 543 | 540.9 | 17.7 | 3.17 |
| 1-Palmitoylglycerol | 566.9 | 550.1 | 549.2 | 17.7 | 3.12 |
| Arachidic acid | 545.1 | 551.6 | 552.4 | -7.3 | -1.34 |
| 2,11-Dicyclohexyldodecane | 557.3 | 563.3 | 564 | -6.7 | -1.2 |
| 1,1-Dicyclohexyldodecane | 562.6 | 565.1 | 564 | -1.4 | -0.25 |
| N-Formylmethionine-leucyl-phenylalanine | 567.6 | 569.7 |  | -2.1 | -0.37 |
| Dibenzo-24-crown-8-ether | 577 | 570.2 | 567.9 | 9.1 | 1.58 |
| Methyl arachidate | 578.99 | 575.2 | 576.2 | 2.79 | 0.48 |
| 3,4-Dimethyl-3,4-bis(4-t-butylphenyl)hexane | 587.9 | 583.2 | 584.1 | 3.8 | 0.65 |
| Tetra-3-methyl-1-butoxysilane | 591.28 | 583.6 | 580.4 | 10.88 | 1.84 |
| Docosane | 563.6 | 583.8 | 585.6 | -22 | -3.9 |
| Tetra-2-pentoxysilane | 610.23 | 586.6 | 578.6 | 31.63 | 5.18 |
| Simvastatin | 577 | 589.5 | 590.9 | -13.9 | -2.41 |
| Tetrapentoxysilane | 621.56 | 590.8 | 584.2 | 37.36 | 6.01 |
| N-Formylmethionine-leucyl-phenylalanine methyl ether | 597.6 | 593.2 |  | 4.4 | 0.74 |
| 2-Stearoylglycerol | 610.4 | 594 | 595.5 | 14.9 | 2.44 |
| 1-Glyceryl stearate | 610.4 | 601 | 601.1 | 9.3 | 1.52 |
| Methylprednisolone aceponate | 604.8 | 615 | 618.6 | -13.8 | -2.28 |
| 3,4-Diethyl-3,4-bis(4-t-butylphenyl)-hexane | 631.3 | 635 | 634.2 | -2.9 | -0.46 |
| Tetramethyltetraphenylcyclotetrasiloxane | 615 | 636.9 |  | -21.9 | -3.56 |
| 2,3,6-Tris(phenylimino)-1,3,5-triphenyl-1,3,5-triazacyclohexane | 672.4 | 673.2 |  | -0.8 | -0.12 |
| Dibenzo-30-crown-10 | 680.4 | 679.6 | 676.9 | 3.5 | 0.51 |
| 2,4,5,7-Tetramethyl-4,5-bis(4-t-butylphenyl)octane | 683.9 | 681.4 | 678.6 | 5.3 | 0.77 |
| Hexacosane | 661.2 | 685.6 | 687.8 | -26.6 | -4.02 |
| 4,5-Dipropyl-4,5-bis-(4-t-butylphenyl)octane | 724.2 | 736 | 736.4 | -12.2 | -1.68 |
| Triacontane | 808.8 | 787.5 | 789 | 19.8 | 2.45 |
| 1,1,3,3,5,5-Hexaphenyl-7,7-dimethylcyclotetrasiloxane | 815.5 | 815.2 |  | 0.3 | 0.04 |
| 5,6-Dibutyl-5,6-bis(4-t-butylphenyl)decane | 805.5 | 837.8 | 843 | -37.5 | -4.66 |
| Dotriacontane | 806 | 838.4 | 840 | -34 | -4.22 |
| Tetra-2-ethyl-1-hexoxysilane | 870.88 | 889.1 | 898.2 | -27.32 | -3.14 |
| Tetratriacontane | 887.4 | 889.3 | 890.8 | -3.4 | -0.38 |
| Pentatriacontane | 915.9 | 914.8 | 913.5 | 2.4 | 0.26 |
| Octaphenylpentacyclosilsesquioxane | 1129 | 1146.8 |  | -17.8 | -1.58 |
