# Supplementary material for: Calculation of the Isobaric Heat Capacities of the Liquid and Solid Phase of Organic Compounds at 298.15K by Means of a Generally Applicable Computer Algorithm Based on the Group-Additivity Method
Source: Preprints.org preprint supplement (doi:10.20944/preprints202002.0076.v1), 2020-02-06
Supplement: Supplementary file 5 [file S05. Outliers of Cp(liq,298) by GA approach.xls]

## Sheet: Tabelle1
Outliers of Cp(liq,298)
Name	Cp(liq) exp	Cp(liq) calc	Diff exp-calc	Abs Diff
Benzene hexa-n-octanoate	2131.3	1722.1	409.2	409.2
Trihexyl tetradecyl phosphonium chloride	772.4	1044.9	-272.5	272.5
Tetrabutylphosphonium 2-aminoethanesulfonate	990	741.3	248.7	248.7
2,5-Dimethyl-2,4-hexadiene	459	233.9	225.1	225.1
Tetrabutylphosphonium L-threoninate	961	758.3	202.7	202.7
Tetrabutylphosphonium L-cysteinate	920	740.2	179.8	179.8
Trihexyl tetradecyl phosphonium decanoate	1162.9	1337.4	-174.5	174.5
1-Hexadecyl-3-methylimidazolium bis(trifluoromethanesulfonyl) amide	1084	911.7	172.3	172.3
Octatetracontane	1594.1	1428	166.1	166.1
1-Ethyltetrahydrothiophenium bis(trifluoromethylsulfonyl) amide	687.5	523.3	164.2	164.2
Tetra-1-dodecoxysilane	1678.85	1515	163.85	163.85
Tetrabutylphosphonium L-lysinate	1000	837.3	162.7	162.7
1,2-Dipiperazinylethane	539.7	378.8	160.9	160.9
Acetophenone diethyl ketal	210	360.9	-150.9	150.9
Trihexyl tetradecyl phosphonium octanoate	1135.6	1279.1	-143.5	143.5
4-Heptoxyphenyl 4'-butylbenzoate	793.3	661	132.3	132.3
n-Hexadecanoic acid	677.8	546.2	131.6	131.6
Hexatriacontane	1205	1077.7	127.3	127.3
Ethane	210.9	85.3	125.6	125.6
N-(2-Trimethylsilylethyl)ethylenimine	300.8	424	-123.2	123.2
Tritriacontane	1112.5	990.2	122.3	122.3
2-Ethoxyethylacetate	376	255.1	120.9	120.9
N-(4-Methoxybenzylidene)-4-n-butylaniline	477	596.5	-119.5	119.5
1-Tetradecyl-3-methylimidazolium bis(trifluoromethanesulfonyl) amide	971.6	853.3	118.3	118.3
Perfluorobutane	127.2	239.6	-112.4	112.4
1-Ethyl-3-methylpyridinium bis(trifluoromethylsulfonyl)amide	630.5	521.3	109.2	109.2
Trielaidin	1841.76	1735.1	106.66	106.66
Trihexyl tetradecyl phosphonium hexanoate	1118.4	1220.7	-102.3	102.3
1-Hexyl-3-methylimidazolium dicyanoamide	534	432.6	101.4	101.4
Perfluoropentane	188.3	289.1	-100.8	100.8
Perfluorohexane	240.2	338.7	-98.5	98.5
4'-Heptyl-p-tercyclohexyl	752.7	655.8	96.9	96.9
Dodecylcyclohexane	615.5	520.7	94.8	94.8
3-Nitro-3-(4-nitrophenyl)pentane	409.79	316.7	93.09	93.09
Methyltributylammonium L-threoninate	753	660	93	93
Octacosane	937.2	844.2	93	93
1-Pentylpyridinium hexafluorophosphate	345.25	436.7	-91.45	91.45
Trihexyl tetradecyl phosphonium dicyanamide	1024.9	1111.6	-86.7	86.7
Tricyclo(5,0(2,6))decane	236.6	322.7	-86.1	86.1
Methyltributylammonium lysinate	824	739.1	84.9	84.9
Acetic acid 2-methoxyethylester	310	226	84	84
1-Octadecyl-3-methylimidazolium bis(trifluoromethanesulfonyl) amide	1052	970.1	81.9	81.9
Tetrabutylammonium docusate	1324	1242.3	81.7	81.7
1-Eicosanethiol	725.9	645.1	80.8	80.8
1-Octyl-3-methylpyridinium tetrafluoroborate	589	511.5	77.5	77.5
Hexamethylbenzene	370.7	294	76.7	76.7
Perfluorododecane	546.8	620.2	-73.4	73.4
Ethyl 2-methylbutyrate	327.4	254.4	73	73
1-(3-Cyanopropyl)-pyridinium bis(trifluoromethylsulfonyl) amide	632	560.4	71.6	71.6
N-(2-Aminoethyl)-N'-((2-aminoethyl)-2-aminoethyl)piperazine	528.9	459	69.9	69.9
Triethanolamine	389	319.9	69.1	69.1
Glycidyl butyrate	337.358	268.4	68.9578	68.9578
1,4,8,11-Tetraazacyclotetradecane	374.6	443.3	-68.7	68.7
Diphenylsulfide	271.1	339.1	-68	68
Trihexyl tetradecyl phosphonium butyrate	1095.1	1162.3	-67.2	67.2
3-Methylthiophene	150.62	216.5	-65.88	65.88
Thiophene	123.8	187.6	-63.8	63.8
2,2-Dimethyl-3-pentanol	349	287.8	61.2	61.2
cis-3-Methylcyclohexanol	199.6	258.8	-59.2	59.2
Paraldehyde	257.3	199.1	58.2	58.2
4-Chloromethyl-1,3-dioxolan-2-one	248.1	190.5	57.6	57.6
cis-Bicyclo(4,2,0)octane	258.6	201.1	57.5	57.5
trans-4-Methylcyclohexanol	202.1	258.8	-56.7	56.7
1-Hexyl-2-propyl-3,5-diethylpyridinium bis(trifluoromethylsulfonyl)amide	766	821.7	-55.7	55.7
m-Terphenyl	417.1	363.1	54	54
Tetra-1-decoxysilane	1373.5	1319.6	53.9	53.9
1,3-Bis-(1-isocyanato-1-methylethyl)benzene	464	410.3	53.7	53.7
Diacetone alcohol	221.3	270.7	-49.4	49.4
Eicosane	663.6	614.2	49.4	49.4
Tetra-1-heptoxysilane	909.4	958.2	-48.8	48.8
trans-Stilbene	343.1	294.3	48.8	48.8
N-Benzylbenzaldehyde imine	384.7	337.7	47	47
1-Octadecanethiol	648	601.1	46.9	46.9
4-Chloronitrobenzene	250.2	203.4	46.8	46.8
2-Methyl-3-buten-2-ol	208.4	254.1	-45.7	45.7
1-Hexyl-3-methylpyridinium bromide	343	388.4	-45.4	45.4
Tributylcarbinol	548.6	503.9	44.7	44.7
Glycerol	218.9	260.9	-42	42
1-Butyl-3-methylimidazolium nitrate	353.5	311.7	41.8	41.8
Octaethylcyclotetrasiloxane	746	704.2	41.8	41.8
1,5-Hexadiene	133.1	174.7	-41.6	41.6
2,4-Toluene diisocyanate	287.8	246.6	41.2	41.2
2-Methyl-2,4-pentanediol	263.1	303.2	-40.1	40.1
N-Propylpyridinium tetrafluoroborate	363	323.1	39.9	39.9
Cyclobutanol	143.12	182.9	-39.78	39.78
4-Propyl-4-heptanol	446.6	407.2	39.4	39.4
2,3-Epoxypropyl methacrylate	299.958	260.6	39.3576	39.3576
4-Carbomethoxyhomocubane	288	248.9	39.1	39.1
1,1,3,3-Tetraethyl-5,5-dimethylcyclotrisiloxane	502.9	463.8	39.1	39.1
Decamethyltetrasiloxane	538.77	577.7	-38.93	38.93
1-Hexyl-3-methylimidazolium hexafluorophosphate	424	462.8	-38.8	38.8
Quadricyclane	157.6	119	38.6	38.6
Hexa(phenylthio)benzene	1036.39	1074.9	-38.5059	38.5059
Pentyl propanoate	245.2	283.6	-38.4	38.4
Diisopentyl ether	379	340.6	38.4	38.4
Decamethylcyclopentasiloxane	634.6	596.7	37.9	37.9
Isophytol	729.7	691.9	37.8	37.8
1-Hexyl-3,5-dimethylpyridinium bis(trifluoromethylsulfonyl)amide	620	657.7	-37.7	37.7
Ethyl stearate	605	642.6	-37.6	37.6
Tripropylene glycol	440.6	478.1	-37.5	37.5
1-Butyl-4-methylpyridinium tetrafluoroborate	414	376.6	37.4	37.4
2-Tetradecanone	415.2	452.5	-37.3	37.3
Methyltributylammonium serinate	635	672.3	-37.3	37.3
1-(3-Cyanopropyl)-pyridinium dicyanamide	422	384.8	37.2	37.2
4-Ethyl-3-hexanol	361.3	324.1	37.2	37.2
Glycidol	132.603	169.7	-37.0968	37.0968
3-Ethyl-3-pentanol	353.9	317	36.9	36.9
1-Hexadecanethiol	574	537.3	36.7	36.7
Pyrrolidinium nitrate	228	192	36	36
1,1,1,5,5,5-Hexamethyl-3,3-diphenyltrisiloxane	648	612.4	35.6	35.6
Tristearin	1787.47	1822.9	-35.43	35.43
2,3,6,7,10,11-Hexaoctanoyloxytriphenylene	1956.1	1920.7	35.4	35.4
4-Nitrotoluene	172.4	207.5	-35.1	35.1
2,3-Butanediol	213	247.8	-34.8	34.8
Dibenzyldisulfide	420.7	386	34.7	34.7
Hydroxymethyl acetate	214	179.3	34.7	34.7
1,2-Propyleneglycol	180.3	214.8	-34.5	34.5
2,2-Dimethyl-1-propanol	244.3	209.8	34.5	34.5
N,N'-Di-(2-aminoethyl)piperazine	407.1	372.9	34.2	34.2
11-Cyclohexyleicosane	787.4	753.3	34.1	34.1
Chloropentafluoroethane	114.2	148.3	-34.1	34.1
Tetrabutylphosphonium L-serinate	748	714.2	33.8	33.8
Di-n-octyladipate	701.5	735.2	-33.7	33.7
1-Ethylpyridinium hexafluorophosphate	293	326.6	-33.6	33.6
1H,1H-Perfluorotetradecan-1-ol	725.3	758.8	-33.5	33.5
1-(1-Isocyanato-1-methylethyl-3-(1-methylethenyl)benzene	382	348.7	33.3	33.3
Di-n-octylamine	507.2	540.5	-33.3	33.3
1-Octyl-3-methylimidazolium trifluoromethylsulfonate	577.7	544.5	33.2	33.2
Tetrabutylphosphonium L-valinate	747	780.1	-33.1	33.1
Diisopropanolamine	328.18	361.1	-32.9198	32.9198
1-Hexyl-3-methylimidazolium bromide	344	376.8	-32.8	32.8
N-Butylpyridinium tetrafluoroborate	383.8	351	32.8	32.8
1-Propylpyridinium hexafluorophosphate	328.7	361.4	-32.7	32.7
Ethyl 1-ethylnicotinate ethosulfate	513	480.3	32.7	32.7
1-Cyclopentylmethyl-3-methylimidazolium bis(trifluoromethanesulfonyl) amide	560.6	593.2	-32.6	32.6
N-Phenylpiperidine	324.112	291.7	32.412	32.412
4-t-Butylbiphenyl	383.6	351.4	32.2	32.2
3,7,11-Trimethyl-1-dodecen-3-ol	574.5	542.4	32.1	32.1
Perfluoroheptane	419	387.2	31.8	31.8
3-Methyl-4-heptanol	355.8	324.2	31.6	31.6
Hexaethylcyclotrisiloxane	535.1	503.7	31.4	31.4
Ethylurea	151.5	182.9	-31.4	31.4
1-Octyl-3-methylimidazolium bromide	392	423.4	-31.4	31.4
1-Propyl-3-methylpyridinium bis(trifluoromethylsulfonyl)amide	517	548.4	-31.4	31.4
2-Methyl-3-hexanol	324	292.7	31.3	31.3
Di(2-ethylhexyl)adipate	701.5	732.8	-31.3	31.3
Unatriacontane	912.1	943.4	-31.3	31.3
3-Formylpropiononitrile	195.8	164.6	31.2	31.2
Isobutyroylchloride	131.8	162.9	-31.1	31.1
Trihexyl tetradecyl phosphonium acetate	1078.2	1109	-30.8	30.8
3-Oxabicyclo(3,2,2)nonane	185.06	215.8	-30.74	30.74
Benzyl methacrylate	269.9	300.3	-30.4	30.4
1-Ethyl-3-methylimidazolium trifluoroacetate	316	346.3	-30.3	30.3
1-(2-Hydroxyethyl)-3-methyl-1H-imidazolium 2,2,2-trifluoroacetate	369	399	-30	30
1-Naphthol	284.5	254.6	29.9	29.9
N-Octyl-3-methylpyridinium bis(trifluoromethanesulfonyl) amide	669	698.8	-29.8	29.8
1,2-Diethylpyridinium ethylsulfate	412	441.5	-29.5	29.5
n-Dodecylmercaptan	442.7	414	28.7	28.7
5-Methyl-2-heptanol	296.2	324.8	-28.6	28.6
Cyclobutanol	153.7	182.3	-28.6	28.6
Diethylenetriamine	254	282.5	-28.5	28.5
4'-Heptyl-m-tercyclohexyl	668.6	640.3	28.3	28.3
Hexaethylene glycol	620.1	591.8	28.3	28.3
2-Piperidone	208.4	180.1	28.3	28.3
Pentafluoroaniline	231	259.2	-28.2	28.2
3-Methyl-2-heptanol	297.5	325.4	-27.9	27.9
N-(2-Trimethylsilylethyl)trimethylenimine	304.6	332.4	-27.8	27.8
Vinylacetate	169.5	141.9	27.6	27.6
1-Tetradecanethiol	501.7	474.1	27.6	27.6
Not evaluable:
1-(2,2,3-Trimethyl-1,3-oxazolidin-5-yl)-butane-1,2,3,4-tetrol	546.792			0
1-(3-Cyanopropyl)-2,3-dimethylimidazolium bis(trifluoromethylsulfonyl) amide	715			0
1-(3-Cyanopropyl)-2,3-dimethylimidazolium chloride	282			0
1,1,3,3-Tetramethyl-1,3-diphenyldisiloxane	508.1			0
1-Butyl-1-methylpyrrolidinium tris(pentafluoroethyl)trifluorophosphate	769			0
1-Ethylazepanium ethosulfate	341.544			0
1-Methyl-3-decylimidazolium saccharinate	774.6			0
1-Methyl-3-octylimidazolium saccharinate	702.2			0
1-Methyltetrahydrothiophenium bis(trifluoromethylsulfonyl) amide	797.368			0
1-Methyltetrahydrothiophenium saccharinate	573.614			0
2,2,4,4,6,6-Hexamethylcyclotrisilazane	428			0
4-Chloro-1,3-dioxolan-2-one	238.1			0
Imidazolium octanoate	769			0
N,N-Diethylhydroxylamine	370.8			0
Tributylphosphate	379.4			0
Tris(perfluorobutyl)amine	418.4			0
