# Supplementary material for: Calculation of the Isobaric Heat Capacities of the Liquid and Solid Phase of Organic Compounds at 298.15K by Means of a Generally Applicable Computer Algorithm Based on the Group-Additivity Method
Source: Preprints.org preprint supplement (doi:10.20944/preprints202002.0076.v1), 2020-02-06
Supplement: Supplementary file 7 [file S06. Outliers of Cp(sol,298) by GA approach.xls]

## Sheet: Tabelle1
Outliers of Cp(sol,298)
Name	Cp(sol) exp	Cp(sol) calc	Diff exp-calc	Abs Diff
Benzene hexa-n-octanoate	2131.3	1466.3	665	665
1-Aceto-3-stearin	938.5	659.6	278.9	278.9
N-Benzyl-pivalophenone imine	588.206	349.5	238.706	238.706
4,4'-Bis(maleimidophenyl)methane	118	353.6	-235.6	235.6
Capric acid	475.59	295.3	180.29	180.29
1,2-Diaceto-3-stearin	904.057	726.2	177.857	177.857
Benzene hexa-n-hexanoate	1294.9	1162.2	132.7	132.7
Fenoxycarb	280.28	399.3	-119.02	119.02
N-Phenyl 4-nitrobenzaldimine	398.182	280.1	118.082	118.082
2,4-Dinitrobenzaldehyde	111.83	225.2	-113.37	113.37
N-Phenylbenzophenone imine	429.76	329.5	100.26	100.26
Tetracosane	730.9	634.4	96.5	96.5
Tetratetracontane	1049.6	1143.6	-94	94
Fullerene C70	664.21	574.2	90.01	90.01
4-Nitroanisol	279.9	191.7	88.2	88.2
Tetra-1-hexoxysilane	765.92	687.2	78.72	78.72
Pentacontane	1220.9	1296.4	-75.5	75.5
Dimethylsulfone	125.35	200.3	-74.95	74.95
Hexa(phenylthio)benzene	777.07	851.8	-74.73	74.73
2,2'-Azobisisobutyronitrile	237.55	310.2	-72.65	72.65
Octaphenyltetracyclosiloxane	932.5	1004.8	-72.3	72.3
Thiane sulfone	159.4	228.7	-69.3	69.3
2,2'-Diaminodiphenyldisulfide	223.8	291.3	-67.5	67.5
Glucamine	330	263.2	66.8	66.8
4,5-Diethyl-4,5-bis-(4-tert-butylphenyl)-octane	618.5	684.8	-66.3	66.3
Benzylideneaniline	302.67	238.5	64.17	64.17
Hexaphenylcyclotrisiloxane	683.7	747.4	-63.7	63.7
Dimethyl cubane-1,4-dicarboxylate	251.1	188.6	62.5	62.5
N-Methylbenzaldehydeimine	164.45	226.4	-61.95	61.95
1,3,5-Triazine	95.57	35.3	60.27	60.27
2-Chloronaphthalene	235.64	175.8	59.84	59.84
N-Cyclohexyl-2,4,6-trimethylbenzaldehyde imine	394.51	334.9	59.61	59.61
2,2-Bis(phenyl-4-glycidoxy)propane	485.9	426.4	59.5	59.5
Hexatriacontane	881	940	-59	59
Maltotriose	662.5	605.5	57	57
2-Naphthylamine	125.9	181.7	-55.8	55.8
EDNH	331.3	386.6	-55.3	55.3
Cyclodextrin	1153	1098.1	54.9	54.9
N-Methylglucamine	330	276.9	53.1	53.1
Eicosane	479.9	532.9	-53	53
Bullvalene	190.38	137.5	52.88	52.88
N-(2-Hydroxy-4-methoxybenzylidene)-4-butylaniline	451	398.9	52.1	52.1
2-Methyl-3-amino-4-methoxymethyl-5-aminomethylpyridine	307.1	255.9	51.2	51.2
Hexacyclopropylethane	396.1	345.9	50.2	50.2
Methylsalicylate	244.3	197.1	47.2	47.2
Homocubane-4-carboxylic acid	207	160.1	46.9	46.9
Tritriacontane	900.8	855.1	45.7	45.7
Maleic anhydride	67.4	112.8	-45.4	45.4
Myclobutanil	362.78	407.4	-44.62	44.62
2,4-Dihydroxycinnamic acid	178.36	221.4	-43.04	43.04
Pyridoxine	244.46	201.5	42.96	42.96
not evaluable:
1,3,5-Trithiane	135.3
