# Supplementary material for: Calculation of the Isobaric Heat Capacities of the Liquid and Solid Phase of Organic Compounds at 298.15K by Means of a Generally Applicable Computer Algorithm Based on the Group-Additivity Method
Source: Preprints.org preprint supplement (doi:10.20944/preprints202002.0076.v1), 2020-02-06
Supplement: Supplementary file 9 [file Table 1.doc]

| **Atom Type** | **Neighbours** | **Meaninga** | **Example** |
| --- | --- | --- | --- |
| B(-) | F4 | **B**F4- | tetrafluoroborate |
| C sp3 | H2CN(+) | C**C**H2N(+) | C1 in tetraalkylammonium |
| C sp3 | H2CP(+) | C**C**H2P(+) | C1 in tetraalkylphosphonium |
| C sp3 | H2CS(+) | C**C**H2S(+) | C1 in trialkylsulfonium |
| C(-) sp3 | C3 | C3**C**- | central C- in tricyanocarbeniate |
| C aromatic | H:C:N(+) | C:**C**H:N+ | C2 in pyridinium |
| C(+) aromatic | H:N2 | N:**C**+H:N | C2 in imidazolium |
| C sp | B#N(-) | B-(**C**#N) | C in tetracyanoborate |
| C sp | C#N(-) | C-(**C**#N) | cyano-C in tricyanocarbeniate |
| C sp | N#N(-) | N-(**C**#N) | C in dicyanoamide |
| C sp | =N=S(-) | N=**C**=S- | thiocyanate |
| N(+) sp3 | C4 | **N**+C4 | tetraalkylammonium |
| N(+) sp2 | O2=O(-) | **N**O3- | nitrate |
| N aromatic | C2:C(+) | C-**N**(C):C+ | N1 and N3 in 1,3-dialkylimidazolium |
| N(+) aromatic | C:C2 | C:**N**+(C):C | N in 1-alkylpyridinium |
| N(-) | C2 | C-**N**--C | N- in dicyanoamide |
| N(-) | CS | C-**N**--S | N- in saccharinate |
| N(-) | S2 | S-**N**--S | bis(trifluoromethanesulfonyl)amide |
| P4 | CO2=O(-) | C**P**O3- | alkylphosphonate |
| P(+) | C4 | **P**C4+ | tetraalkylphosphonium |
| P(-) | C3F3 | F3**P**-C3 | tris(pentafluoroethyl)trifluorophosphate |
| P(-) | F6 | **P**F6- | hexafluorophosphate |
| S(+) | C3 | C3**S**+ | trialkylsulfonium |
| S4 | CN=O2(-) | C**S**(O2)N- | bis(trifluoromethanesulfonyl)amide |
| S4 | CO=O2(-) | C**S**O3- | alkylsulfonate |
| S4 | O2=O2(-) | **S**O4- | alkylsulfate |
