# Supplementary material for: Calculation of the Isobaric Heat Capacities of the Liquid and Solid Phase of Organic Compounds at 298.15K by Means of a Generally Applicable Computer Algorithm Based on the Group-Additivity Method
Source: Preprints.org preprint supplement (doi:10.20944/preprints202002.0076.v1), 2020-02-06
Supplement: Supplementary file 19 [file Table 5.doc]

| Molecule name | Cp(liq,298) calc. (GA) | Dev. (%) | Cp(liq,298) exp. | Dev. (%) | Cp(liq,298) calc.(Vm) |
| --- | --- | --- | --- | --- | --- |
| Cyclobutane | 111.00 | -4.42 | 106.30 | -13.26 | 120.40 |
| Butane | 134.20 | 4.76 | 140.90 | 2.84 | 136.90 |
| Cyclopentane | 130.60 | -1.40 | 128.80 | -15.30 | 148.50 |
| Pentane | 164.40 | 1.67 | 167.19 | -0.01 | 167.20 |
| Cyclohexane | 156.80 | 0.82 | 158.10 | -12.14 | 177.30 |
| Hexane | 194.30 | 1.70 | 197.66 | 0.08 | 197.50 |
| Cycloheptane | 182.90 | -1.27 | 180.61 | -13.23 | 204.50 |
| Heptane | 224.30 | 0.46 | 225.33 | -1.10 | 227.80 |
| Cyclooctane | 209.00 | 3.03 | 215.53 | -10.29 | 237.70 |
| Octane | 254.40 | 0.50 | 255.68 | -0.99 | 258.20 |
