# Supplementary material for: Calculation of the Isobaric Heat Capacities of the Liquid and Solid Phase of Organic Compounds at 298.15K by Means of a Generally Applicable Computer Algorithm Based on the Group-Additivity Method
Source: Preprints.org preprint supplement (doi:10.20944/preprints202002.0076.v1), 2020-02-06
Supplement: Supplementary file 23 [file Table 7.doc]

| **Entry** | **Atom Type** | **Neighbours** | **Contribution** | **Occurrences** | **Molecules** |
| --- | --- | --- | --- | --- | --- |
| 1 | B(-) | F4 | 2.99 | 1 | 1 |
| 2 | C sp3 | H3C | 37.29 | 567 | 245 |
| 3 | C sp3 | H3N | 101.87 | 50 | 34 |
| 4 | C sp3 | H3N(+) | 99.64 | 7 | 4 |
| 5 | C sp3 | H3O | 68.1 | 51 | 35 |
| 6 | C sp3 | H3S | 46.07 | 3 | 3 |
| 7 | C sp3 | H3P | 131.12 | 1 | 1 |
| 8 | C sp3 | H3Si | 59.13 | 14 | 5 |
| 9 | C sp3 | H2C2 | 25.46 | 1427 | 249 |
| 10 | C sp3 | H2CN | 83.2 | 89 | 56 |
| 11 | C sp3 | H2CN(+) | 81.21 | 19 | 15 |
| 12 | C sp3 | H2CO | 64.56 | 208 | 107 |
| 13 | C sp3 | H2CS | 71.69 | 22 | 12 |
| 14 | C sp3 | H2CF | 53.8 | 4 | 1 |
| 15 | C sp3 | H2CCl | 50.23 | 5 | 2 |
| 16 | C sp3 | H2CBr | 56.84 | 7 | 3 |
| 17 | C sp3 | H2CJ | 53.06 | 4 | 1 |
| 18 | C sp3 | H2CSi | 63.08 | 1 | 1 |
| 19 | C sp3 | H2N2 | 135.41 | 13 | 3 |
| 20 | C sp3 | H2O2 | 108.24 | 12 | 3 |
| 21 | C sp3 | H2S2 | -6.6 | 3 | 3 |
| 22 | C sp3 | HC3 | 11.82 | 164 | 73 |
| 23 | C sp3 | HC2N | 73.23 | 28 | 23 |
| 24 | C sp3 | HC2N(+) | 70.51 | 29 | 28 |
| 25 | C sp3 | HC2O | 51.69 | 161 | 63 |
| 26 | C sp3 | HC2S | 46.93 | 2 | 1 |
| 27 | C sp3 | HC2Si | 142.14 | 1 | 1 |
| 28 | C sp3 | HCN2 | 138.12 | 1 | 1 |
| 29 | C sp3 | HCNO | 120.32 | 7 | 5 |
| 30 | C sp3 | HCNS | 116.38 | 2 | 1 |
| 31 | C sp3 | HCO2 | 112.23 | 17 | 14 |
| 32 | C sp3 | HCF2 | 245.73 | 1 | 1 |
| 33 | C sp3 | HCCl2 | 92.87 | 1 | 1 |
| 34 | C sp3 | HCBr2 | 68.65 | 1 | 1 |
| 35 | C sp3 | C4 | -2.63 | 81 | 48 |
| 36 | C sp3 | C3N | 62.22 | 11 | 9 |
| 37 | C sp3 | C3N(+) | 19.3 | 2 | 2 |
| 38 | C sp3 | C3O | 27.24 | 10 | 10 |
| 39 | C sp3 | C3Cl | 77.95 | 1 | 1 |
| 40 | C sp3 | C3Br | 44.17 | 1 | 1 |
| 41 | C sp3 | C2NO | 89.8 | 1 | 1 |
| 42 | C sp3 | C2O2 | 91.24 | 6 | 5 |
| 43 | C sp3 | C2S2 | 43.14 | 5 | 2 |
| 44 | C sp3 | CF3 | 69.89 | 2 | 2 |
| 45 | C sp3 | CSF2 | 0 | 1 | 1 |
| 46 | C sp3 | CCl3 | 92.27 | 4 | 3 |
| 47 | C sp2 | H2=C | 39.9 | 6 | 6 |
| 48 | C sp2 | HC=C | 16.89 | 107 | 64 |
| 49 | C sp2 | HC=N | 100.19 | 13 | 13 |
| 50 | C sp2 | HC=O | 43.07 | 14 | 12 |
| 51 | C sp2 | H=CN | 33.5 | 25 | 17 |
| 52 | C sp2 | H=CO | 42.35 | 3 | 3 |
| 53 | C sp2 | H=CS | 35.95 | 7 | 5 |
| 54 | C sp2 | H=CCl | 19.5 | 1 | 1 |
| 55 | C sp2 | HN=N | 102.43 | 17 | 14 |
| 56 | C sp2 | HN=O | 28.96 | 4 | 3 |
| 57 | C sp2 | H=NO | 113.2 | 1 | 1 |
| 58 | C sp2 | C2=C | 5.71 | 29 | 22 |
| 59 | C sp2 | C2=N | 95.6 | 14 | 10 |
| 60 | C sp2 | C2=N(+) | -10.15 | 2 | 2 |
| 61 | C sp2 | C=CN | 17.94 | 16 | 15 |
| 62 | C sp2 | C2=O | 27.71 | 44 | 30 |
| 63 | C sp2 | C=CO | 25.52 | 15 | 13 |
| 64 | C sp2 | C=CS | 28.84 | 5 | 4 |
| 65 | C sp2 | C=CCl | 35.17 | 6 | 3 |
| 66 | C sp2 | =CN2 | 38.14 | 14 | 14 |
| 67 | C sp2 | =CN2(+) | 78.26 | 7 | 7 |
| 68 | C sp2 | CN=N | 87.04 | 19 | 13 |
| 69 | C sp2 | CN=N(+) | 118.57 | 2 | 1 |
| 70 | C sp2 | CN=O | 36.88 | 131 | 92 |
| 71 | C sp2 | =CNO | 54.98 | 1 | 1 |
| 72 | C sp2 | CN=S | 45.98 | 3 | 3 |
| 73 | C sp2 | CO=O | 51.51 | 204 | 153 |
| 74 | C sp2 | CO=O(-) | 15.47 | 41 | 40 |
| 75 | C sp2 | C=OCl | 61.46 | 2 | 1 |
| 76 | C sp2 | =CS2 | 45.08 | 12 | 2 |
| 77 | C sp2 | N2=N | 113.37 | 5 | 3 |
| 78 | C sp2 | N2=O | 54.86 | 43 | 38 |
| 79 | C sp2 | N=NO | 91.78 | 1 | 1 |
| 80 | C sp2 | N2=S | 66.15 | 7 | 7 |
| 81 | C sp2 | N=NS | 105.5 | 7 | 7 |
| 82 | C sp2 | NO=O | 63.23 | 8 | 8 |
| 83 | C sp2 | NO=S | 64.74 | 3 | 3 |
| 84 | C sp2 | =NOS | 108.26 | 1 | 1 |
| 85 | C sp2 | NS=S | 61.88 | 4 | 3 |
| 86 | C sp2 | O2=O | 57.57 | 4 | 4 |
| 87 | C sp2 | OS=S | 63.63 | 1 | 1 |
| 88 | C aromatic | H:C2 | 17.98 | 3228 | 436 |
| 89 | C aromatic | H:C:N | 24.27 | 37 | 20 |
| 90 | C aromatic | H:C:N(+) | 21.42 | 2 | 1 |
| 91 | C aromatic | H:N2 | 7.39 | 3 | 3 |
| 92 | C aromatic | :C3 | 8 | 171 | 57 |
| 93 | C aromatic | C:C2 | 6.52 | 699 | 307 |
| 94 | C aromatic | C:C:N | 5.82 | 13 | 9 |
| 95 | C aromatic | :C2N | 23.81 | 172 | 107 |
| 96 | C aromatic | :C2N(+) | 49.46 | 57 | 42 |
| 97 | C aromatic | :C2:N | 19.68 | 13 | 7 |
| 98 | C aromatic | :C2O | 29.46 | 184 | 113 |
| 99 | C aromatic | :C2P | 14.99 | 6 | 2 |
| 100 | C aromatic | :C2S | 27.09 | 43 | 28 |
| 101 | C aromatic | :C2Si | 58.35 | 53 | 12 |
| 102 | C aromatic | :C2F | 31.09 | 25 | 9 |
| 103 | C aromatic | :C2Cl | 34.34 | 57 | 25 |
| 104 | C aromatic | :C2Br | 37.46 | 18 | 9 |
| 105 | C aromatic | :C2J | 39.97 | 3 | 2 |
| 106 | C aromatic | C:N2 | 18.94 | 3 | 1 |
| 107 | C aromatic | :CN:N | 38.64 | 7 | 5 |
| 108 | C aromatic | :C:NO | 54.28 | 1 | 1 |
| 109 | C aromatic | :C:NCl | 49.18 | 3 | 3 |
| 110 | C aromatic | N:N2 | 35.87 | 4 | 2 |
| 111 | C aromatic | :N2O | 41.26 | 3 | 1 |
| 112 | C(+) aromatic | H:N2 | -39.79 | 3 | 3 |
| 113 | C(+) aromatic | :N3 | -22.38 | 2 | 2 |
| 114 | C sp | H#C | 102.97 | 2 | 1 |
| 115 | C sp | C#C | 14.88 | 8 | 3 |
| 116 | C sp | C#N | 39.61 | 28 | 20 |
| 117 | C sp | C#N(+) | 62.19 | 1 | 1 |
| 118 | C sp | #CSi | 0 | 2 | 1 |
| 119 | C sp | #NO | 58.45 | 2 | 1 |
| 120 | C sp | =N=O | 111.33 | 6 | 3 |
| 121 | N sp3 | H2C | -19 | 5 | 5 |
| 122 | N sp3 | H2C(pi) | 15.93 | 129 | 98 |
| 123 | N sp3 | H2N | 9.99 | 4 | 3 |
| 124 | N sp3 | H2S | 46.21 | 9 | 9 |
| 125 | N sp3 | HC2 | -105.16 | 6 | 3 |
| 126 | N sp3 | HC2(pi) | -56.91 | 78 | 57 |
| 127 | N sp3 | HC2(2pi) | -8.92 | 82 | 61 |
| 128 | N sp3 | HCN(pi) | 21.17 | 7 | 5 |
| 129 | N sp3 | HCN(2pi) | 36.64 | 7 | 7 |
| 130 | N sp3 | C3 | -160.87 | 15 | 10 |
| 131 | N sp3 | C3(pi) | -124.2 | 10 | 9 |
| 132 | N sp3 | C3(2pi) | -83.56 | 27 | 21 |
| 133 | N sp3 | C3(3pi) | -41.9 | 12 | 6 |
| 134 | N sp3 | C2N(pi) | -74.64 | 3 | 3 |
| 135 | N sp3 | C2N(+)(pi) | -53.79 | 7 | 2 |
| 136 | N sp3 | C2N(2pi) | 25.48 | 3 | 3 |
| 137 | N sp3 | C2N(+)(2pi) | -41.29 | 2 | 2 |
| 138 | N sp2 | C=C | -74.49 | 54 | 44 |
| 139 | N sp2 | C=N | 2.83 | 5 | 3 |
| 140 | N sp2 | =CN | -98.36 | 7 | 7 |
| 141 | N sp2 | =CN(+) | -15.06 | 1 | 1 |
| 142 | N sp2 | =CO | -44.88 | 24 | 11 |
| 143 | N sp2 | N=N | 17.38 | 3 | 2 |
| 144 | N aromatic | H2:C(+) | 4.75 | 4 | 2 |
| 145 | N aromatic | HC:C(+) | 41.06 | 1 | 1 |
| 146 | N aromatic | C2:C(+) | -3.16 | 7 | 4 |
| 147 | N aromatic | :C2 | -0.35 | 50 | 33 |
| 148 | N(+) sp3 | H3C | -6.77 | 35 | 34 |
| 149 | N(+) sp3 | H2C2 | -73.86 | 4 | 4 |
| 150 | N(+) sp3 | HC3 | -156.69 | 1 | 1 |
| 151 | N(+) sp3 | C4 | -234.09 | 2 | 2 |
| 152 | N(+) sp2 | CO=O(-) | 9.69 | 72 | 49 |
| 153 | N(+) sp2 | =CO2(-) | -6.85 | 2 | 2 |
| 154 | N(+) sp2 | NO=O(-) | -2.08 | 10 | 5 |
| 155 | N(+) aromatic | C:C2 | 0 | 1 | 1 |
| 156 | N(+) sp | C#C(-) | 24.95 | 3 | 3 |
| 157 | N(+) sp | #CO(-) | 0 | 1 | 1 |
| 158 | O(prim) | HC | -23.3 | 106 | 60 |
| 159 | O(sec) | HC | -16.22 | 117 | 50 |
| 160 | O(tert) | HC | -3.11 | 6 | 6 |
| 161 | O | HC(pi) | 4.54 | 216 | 156 |
| 162 | O | HN(pi) | 16.34 | 3 | 3 |
| 163 | O | HSi | 16.95 | 8 | 2 |
| 164 | O | C2 | -70.23 | 60 | 29 |
| 165 | O | C2(pi) | -40.01 | 123 | 87 |
| 166 | O | C2(2pi) | -24.52 | 46 | 40 |
| 167 | O | CN(2pi) | -28.89 | 5 | 5 |
| 168 | O | CSi | -30.53 | 36 | 9 |
| 169 | O | N2(2pi) | 0.98 | 7 | 4 |
| 170 | O | N2(+)(2pi) | -1.97 | 2 | 2 |
| 171 | O | Si2 | -7.16 | 39 | 8 |
| 172 | P3 | C3 | -2.25 | 1 | 1 |
| 173 | P4 | C3=O | 2.25 | 1 | 1 |
| 174 | P4 | C=OCl2 | 0 | 1 | 1 |
| 175 | S2 | HC | 11.4 | 1 | 1 |
| 176 | S2 | HC(pi) | 16.45 | 5 | 5 |
| 177 | S2 | C2 | -14.99 | 12 | 8 |
| 178 | S2 | C2(pi) | -30.36 | 14 | 6 |
| 179 | S2 | C2(2pi) | -9.47 | 24 | 17 |
| 180 | S2 | CS | -19.94 | 2 | 1 |
| 181 | S2 | CS(pi) | 7.17 | 6 | 3 |
| 182 | S4 | C2=O | 5.82 | 2 | 2 |
| 183 | S4 | C2=O2 | 16.09 | 5 | 5 |
| 184 | S4 | CN=O2 | 2.71 | 9 | 9 |
| 185 | S4 | CO=O2(-) | -117.33 | 1 | 1 |
| 186 | Si | C4 | -197.28 | 3 | 3 |
| 187 | Si | C3O | -100.61 | 4 | 2 |
| 188 | Si | C3Cl | -107.21 | 1 | 1 |
| 189 | Si | C2O2 | -38.19 | 11 | 3 |
| 190 | Si | CO3 | 10.04 | 20 | 3 |
| 191 | Si | CCl3 | 57.96 | 2 | 2 |
| 192 | Si | O4 | 0 | 9 | 9 |
| 193 | (COH)n | n>1 | 3.59 | 145 | 59 |
| 194 | H | H Acceptor | 1.21 | 61 | 43 |
| 195 | Endocyclic bonds | No of single bds | -1.4 | 994 | 148 |
| 196 | Angle60 |  | 1.04 | 15 | 2 |
| 197 | Angle90 |  | 0.31 | 12 | 6 |
| 198 | Angle102 |  | 2.19 | 283 | 82 |
| A | Based on | Valid groups | 126 |  | 800 |
| B | Goodness of fit | R2 | 0.9915 |  | 732 |
| C | Deviation | Average | 9.35 |  | 732 |
| D | Deviation | Standard | 12.19 |  | 732 |
| E | K-fold cv | K | 10 |  | 659 |
| F | Goodness of fit | Q2 | 0.9875 |  | 659 |
| G | Deviation | Average (cv) | 10.99 |  | 659 |
| H | Deviation | Standard (cv) | 14.13 |  | 659 |
